# Supplementary material for: Palladium-catalyzed direct C2-arylation of azoles with aromatic triazenes
Source: Royal Society of Chemistry journal article supplement (doi:10.1039/c9ob01883b), 2019-01-01

## *Supporting Information*

### **Palladium-Catalyzed Direct C2-Arylation of Azoles with Aromatic Triazenes**

Can Liu,<sup>b</sup> Zhiming Wang,<sup>a</sup> Lei Wang,<sup>\*,a,b,c</sup> Pinhua Li,<sup>b,c</sup> and Yicheng Zhang<sup>\*,b,c</sup>

<sup>a</sup> Advanced Research Institute and Department of Chemistry, Taizhou University, Taizhou, Zhejiang 318000, P. R. China

E-mail: leiwang@chnu.edu.cn

<sup>b</sup> Department of Chemistry, Huaibei Normal University, Huaibei, Anhui 235000, P. R. China

E-mail: lbqzhyeh@163.com

Fax: +86-561-309-0518; Tel: +86-561-380-2069

<sup>c</sup> State Key Laboratory of Organometallic Chemistry and Key Laboratory of Synthetic Chemistry of Natural Substances  
Shanghai Institute of Organic Chemistry, Chinese Academy of Sciences, Shanghai 200032, P. R. China

*C. Liu and Z. Wang contributed equally to this work.*

#### ***Table of Contents for Supporting Information***

|                                                                     |   |
|---------------------------------------------------------------------|---|
| <sup>1</sup> H and <sup>13</sup> C NMR spectra of the products..... | 1 |
|---------------------------------------------------------------------|---|

# <sup>1</sup>H and <sup>13</sup>C NMR spectra of the products

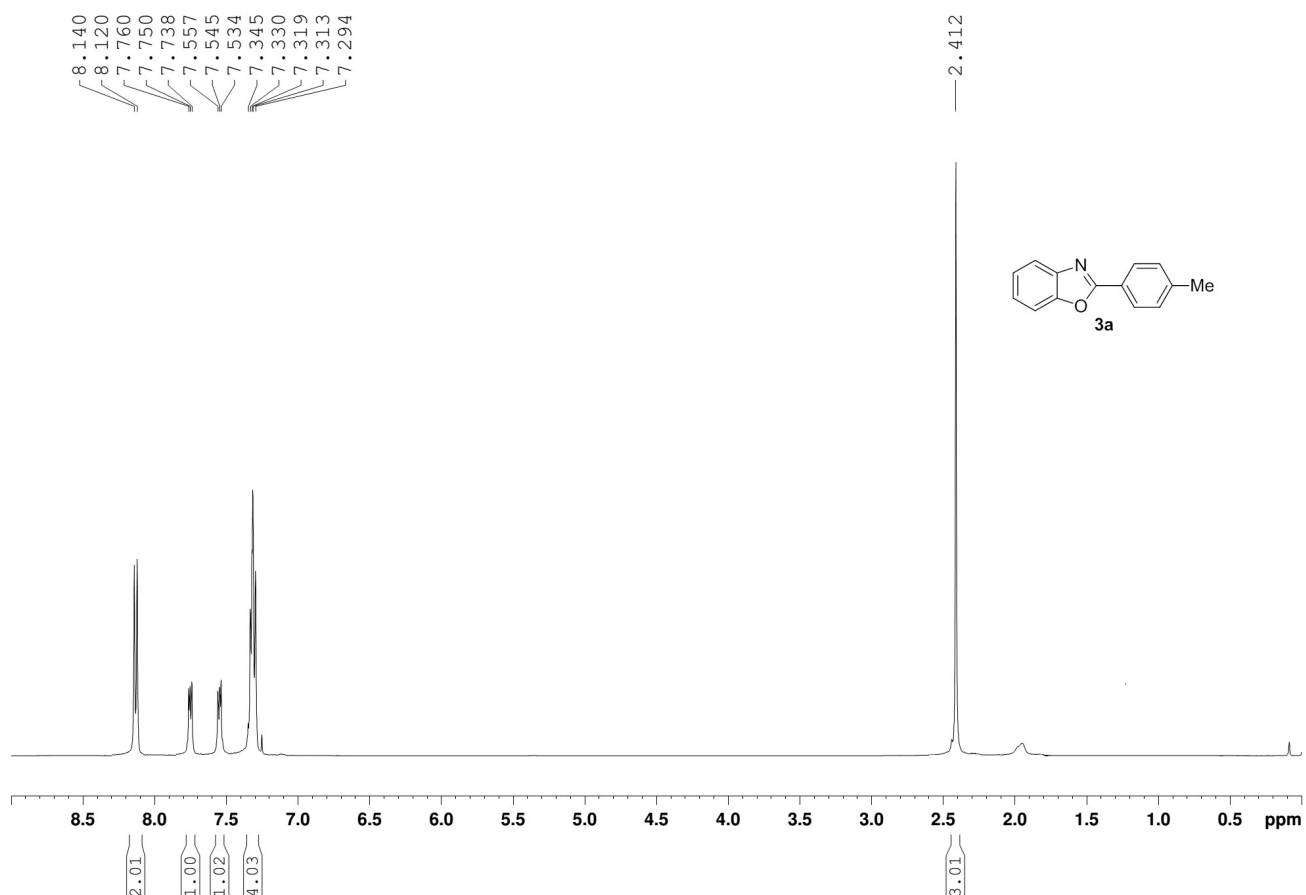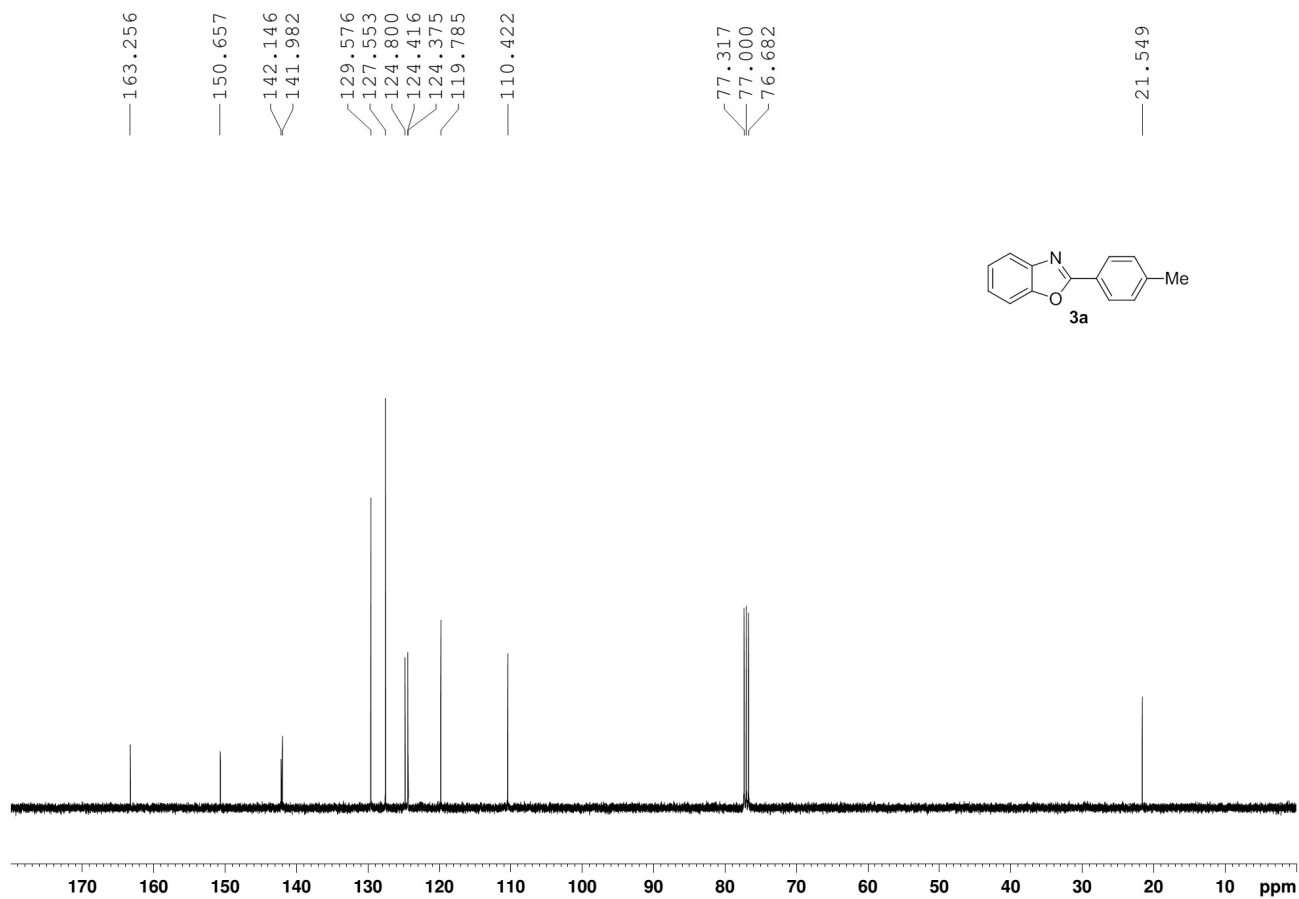

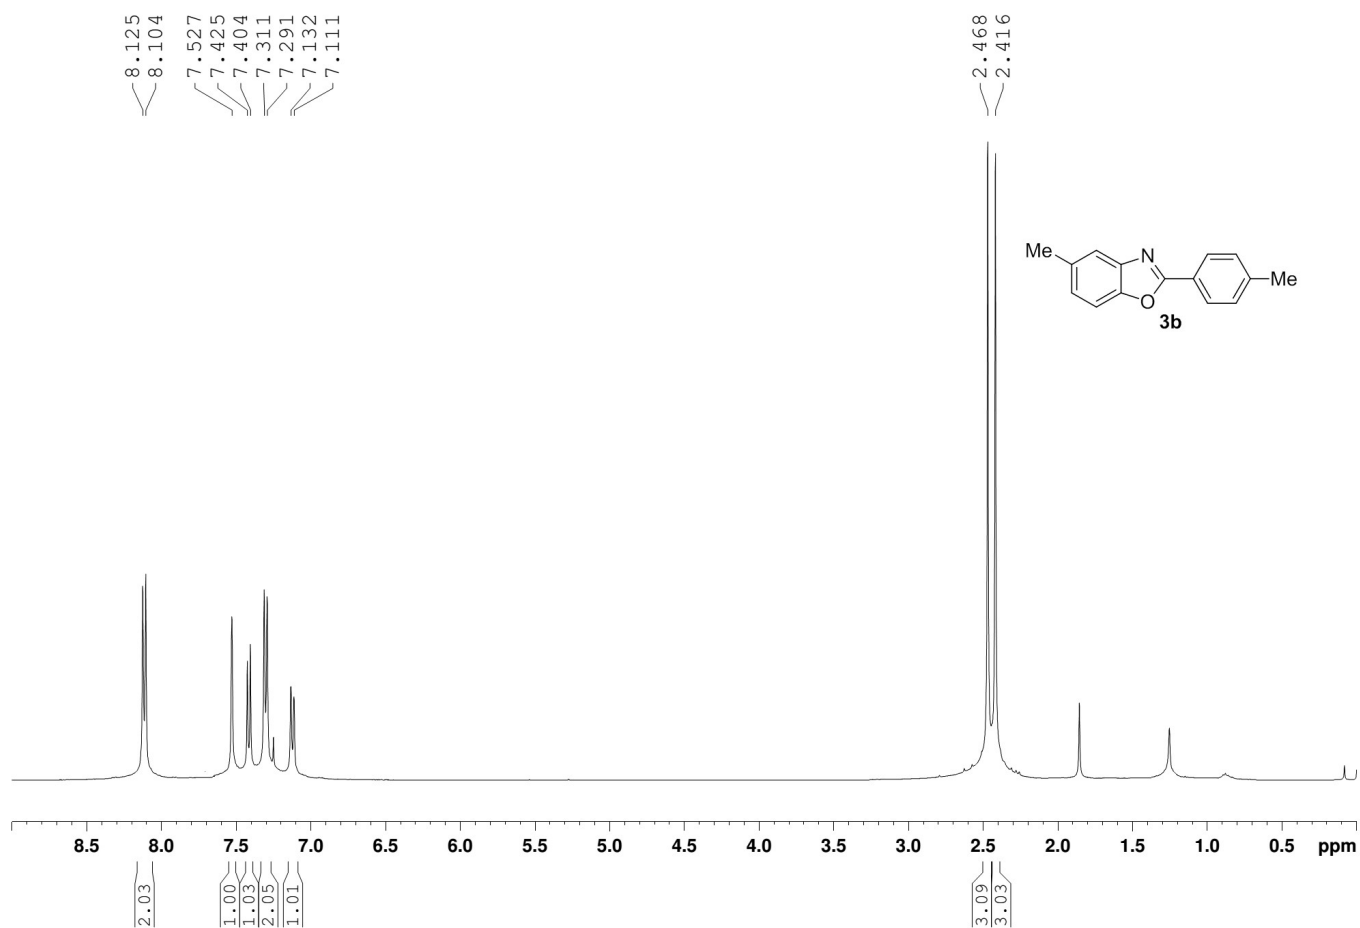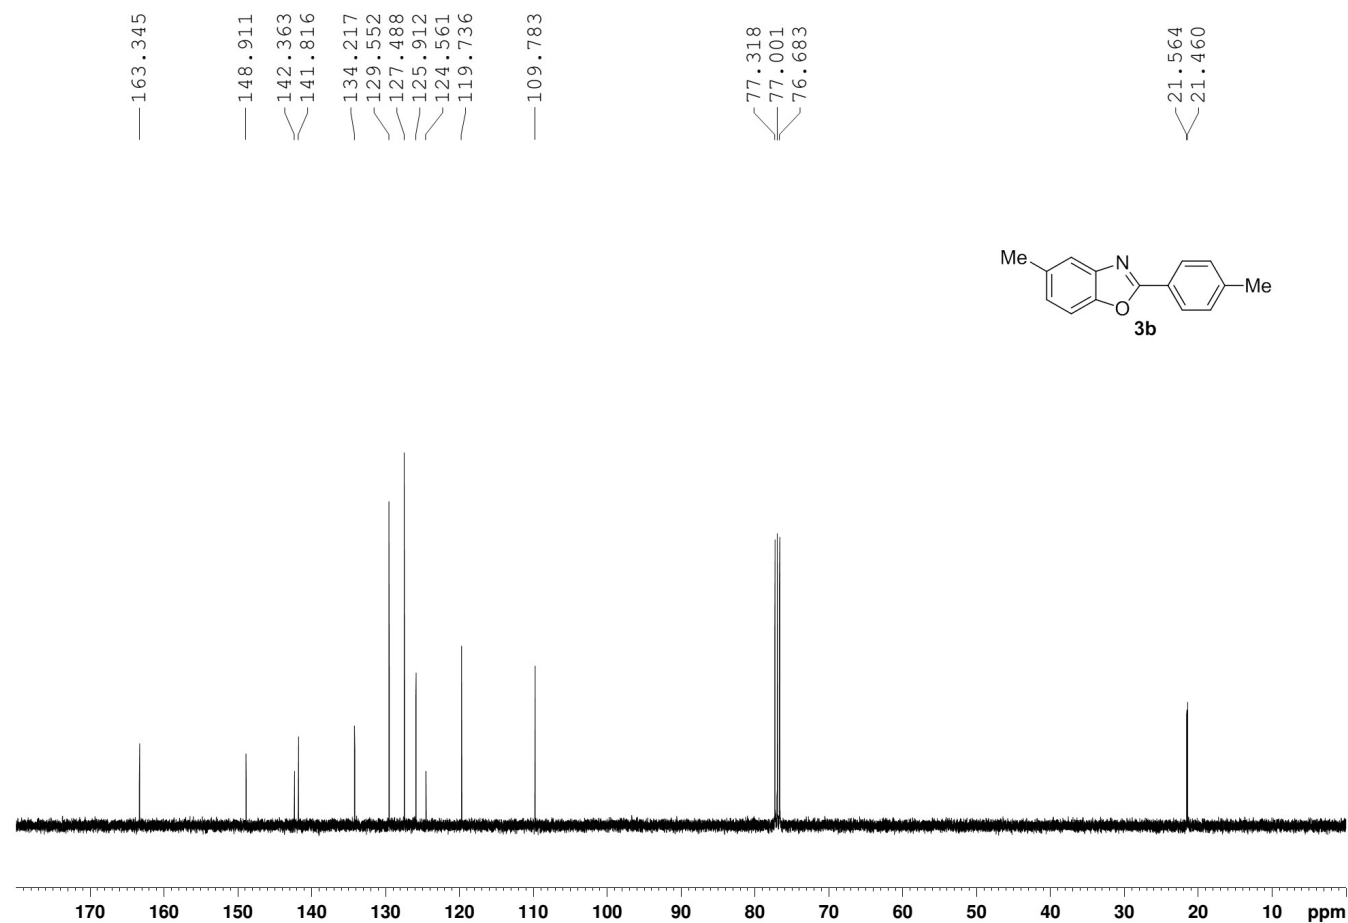

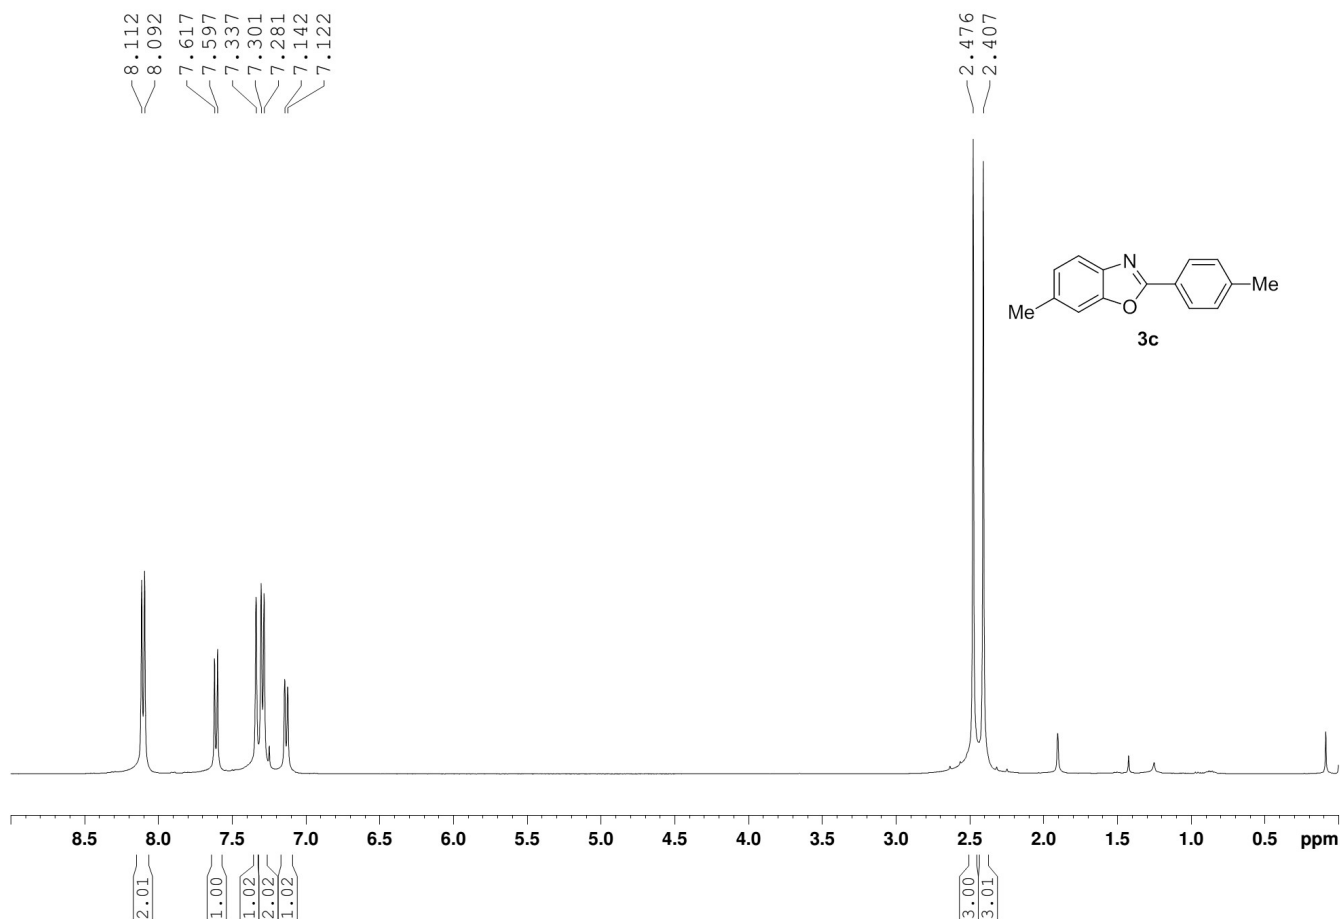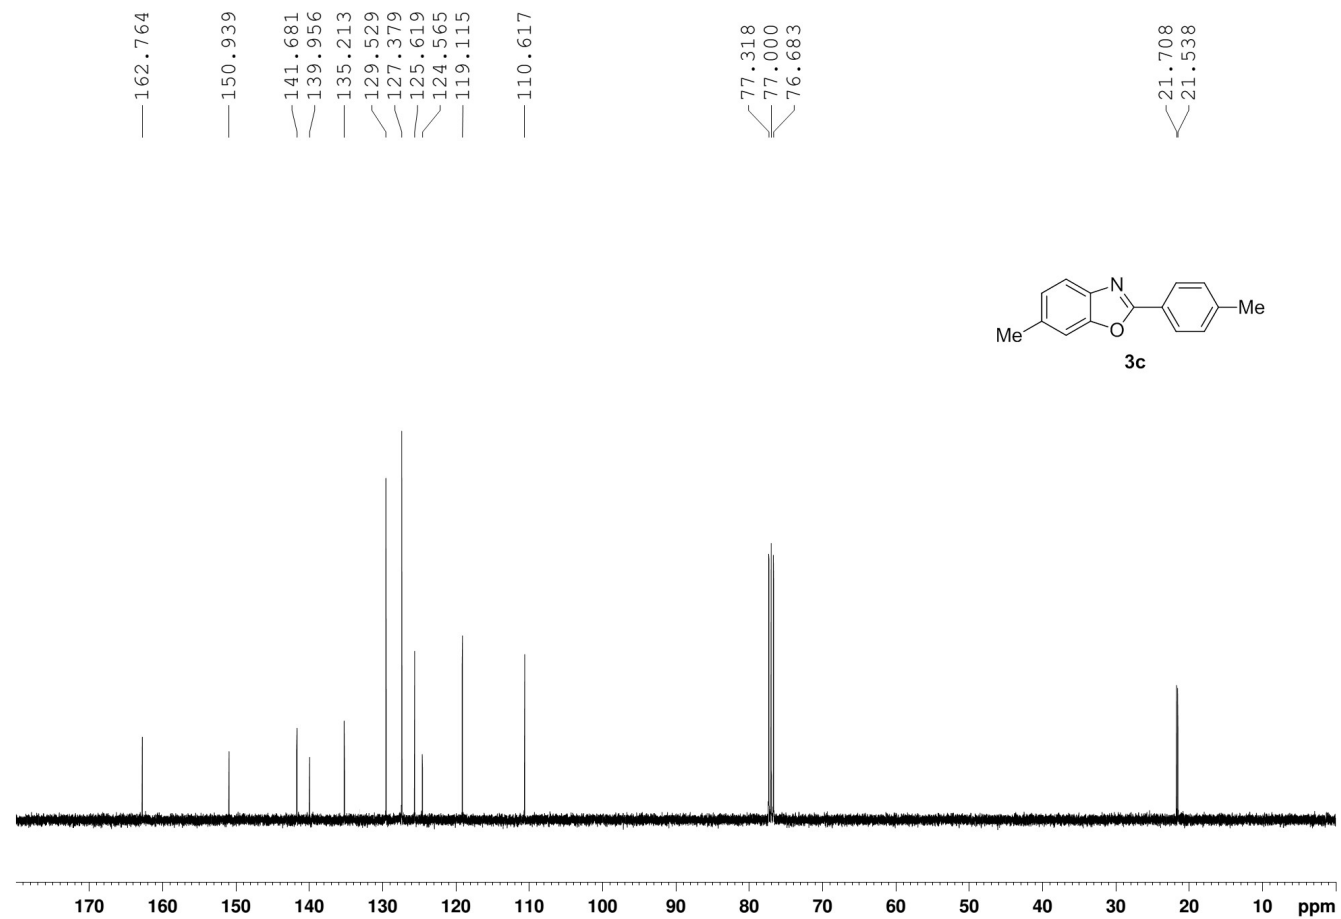



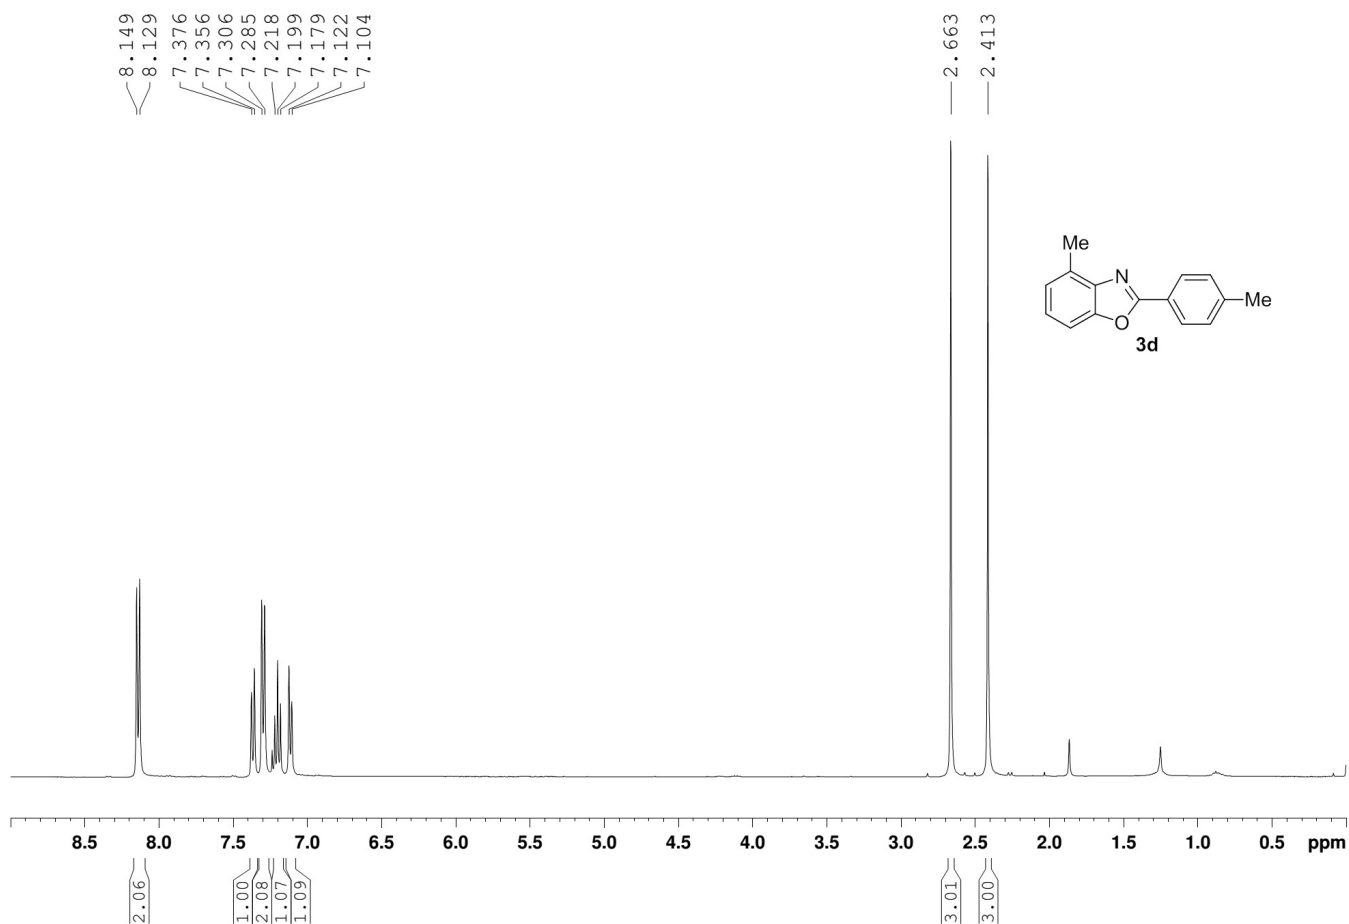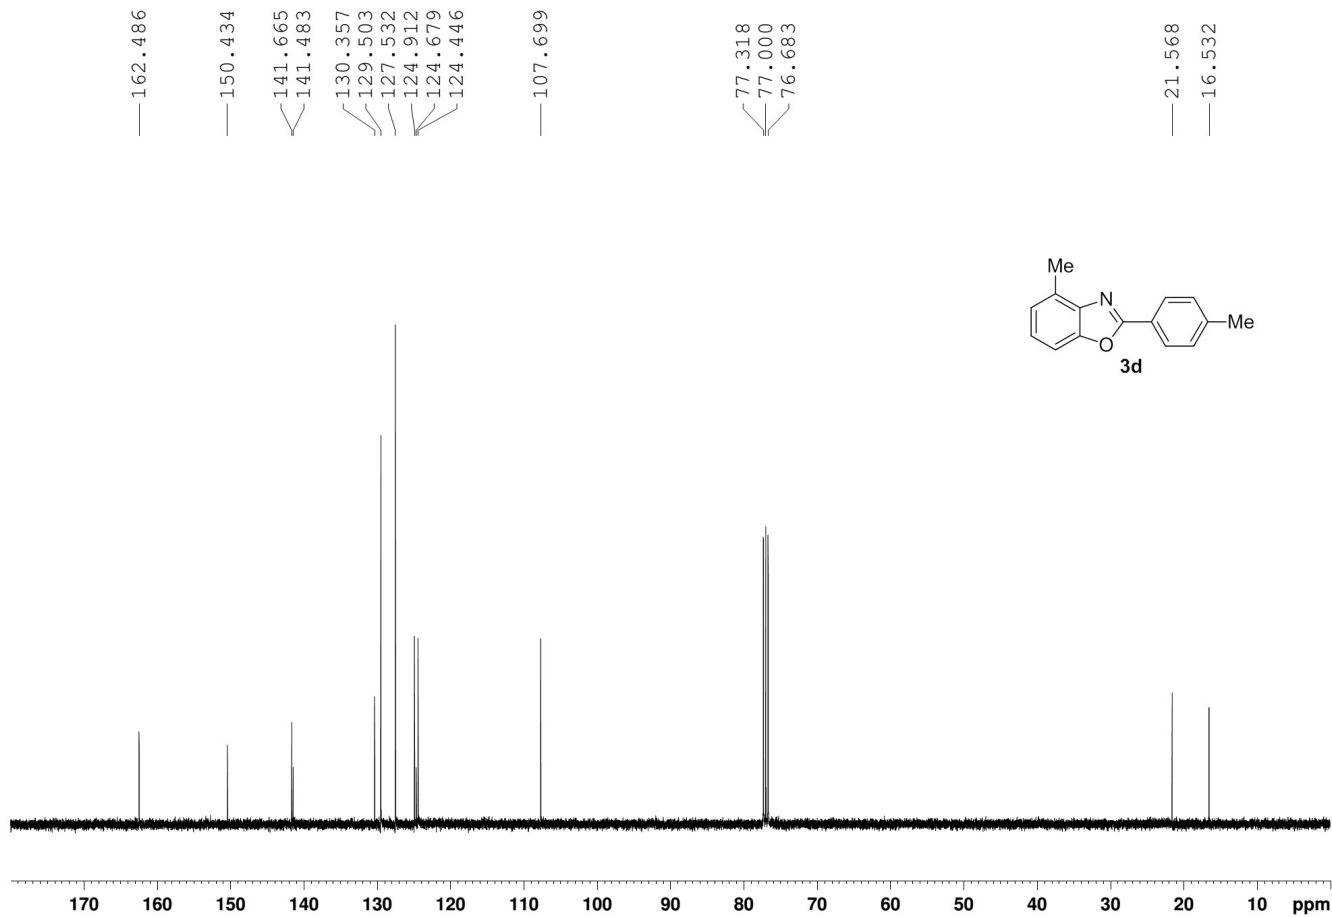

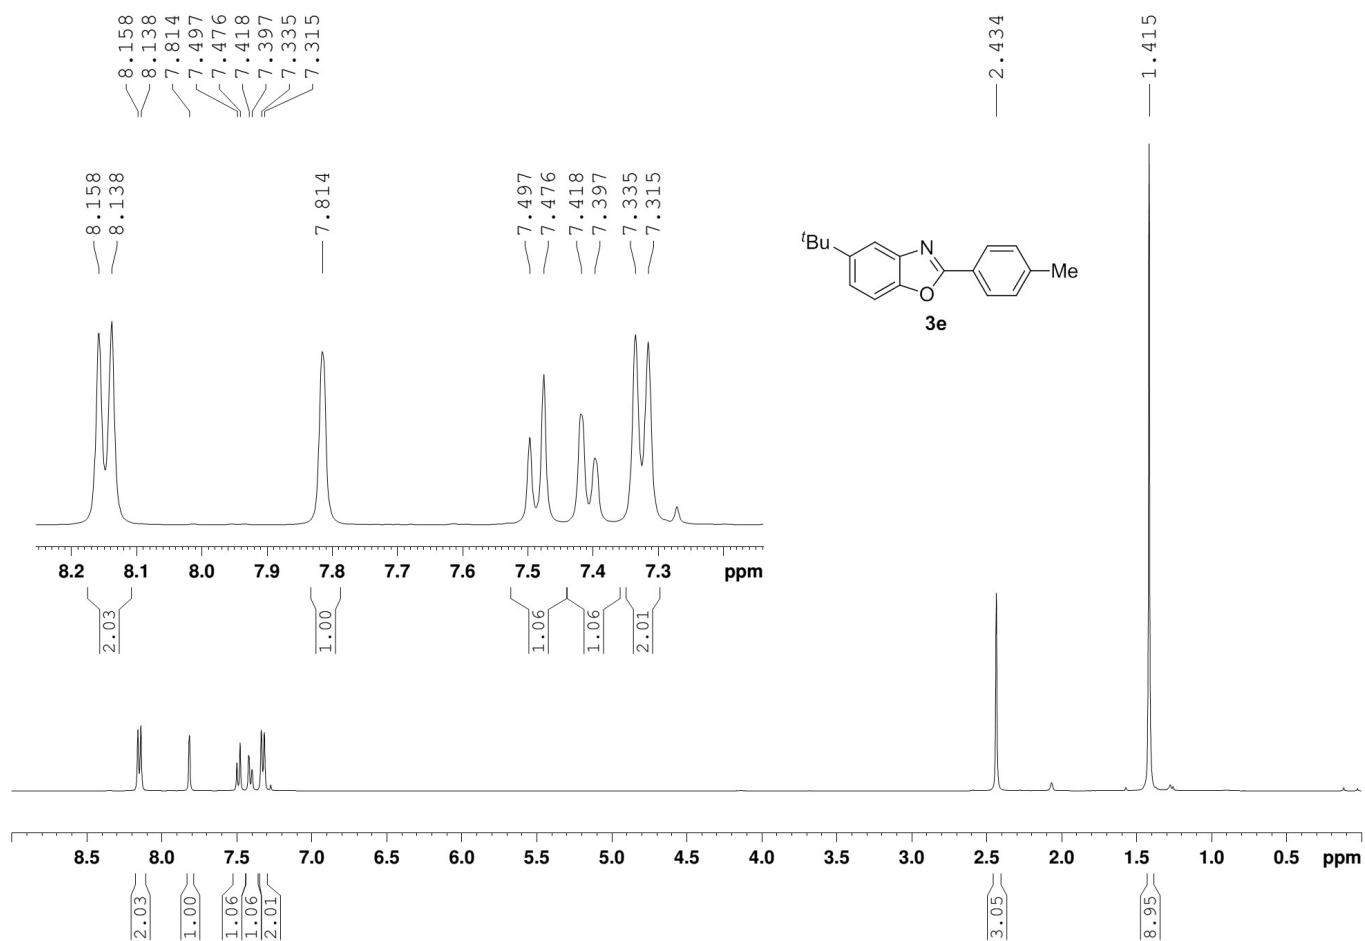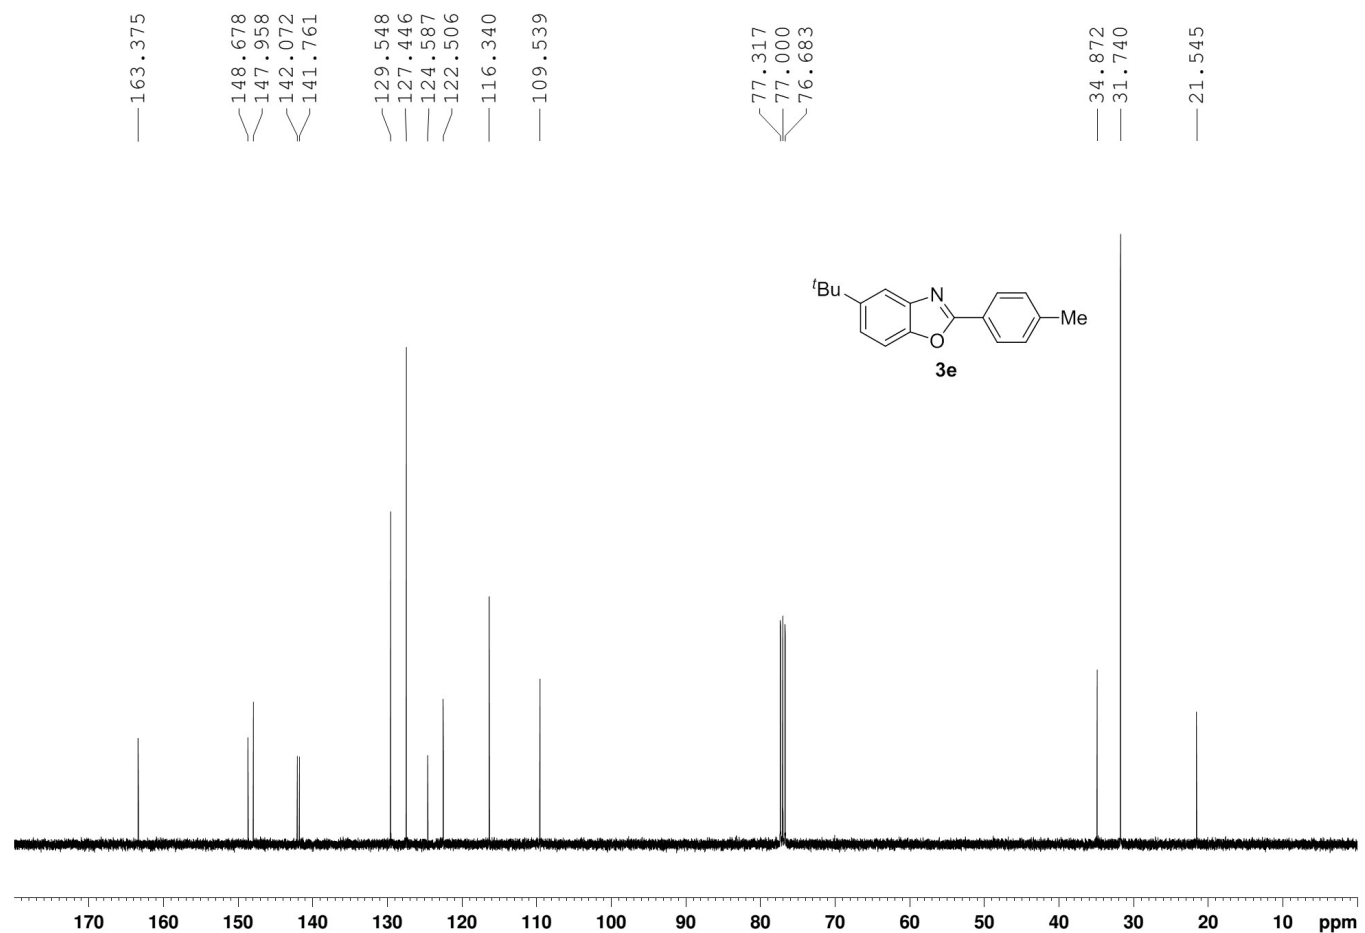

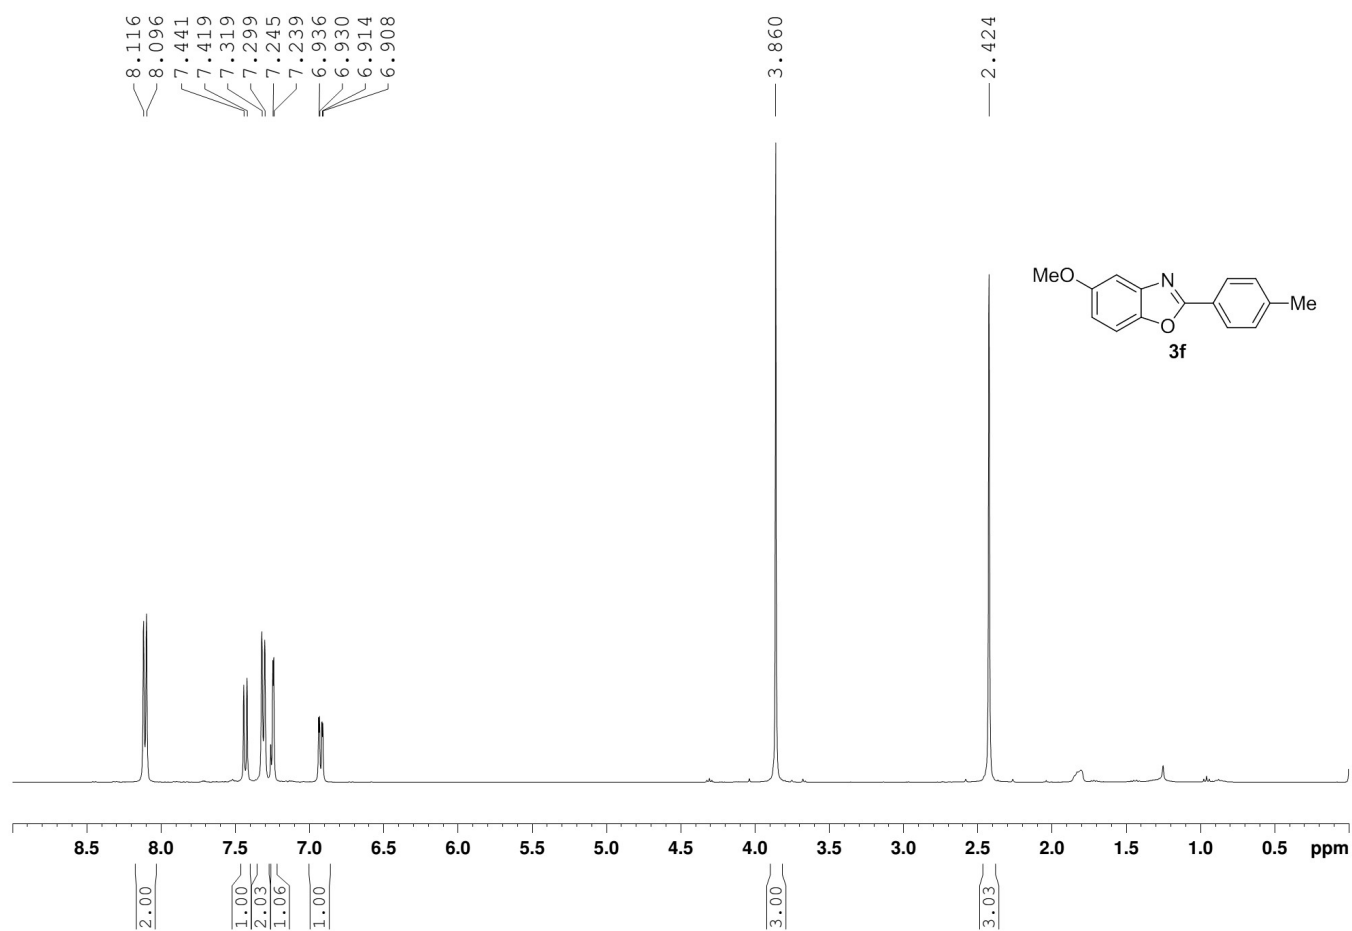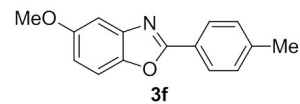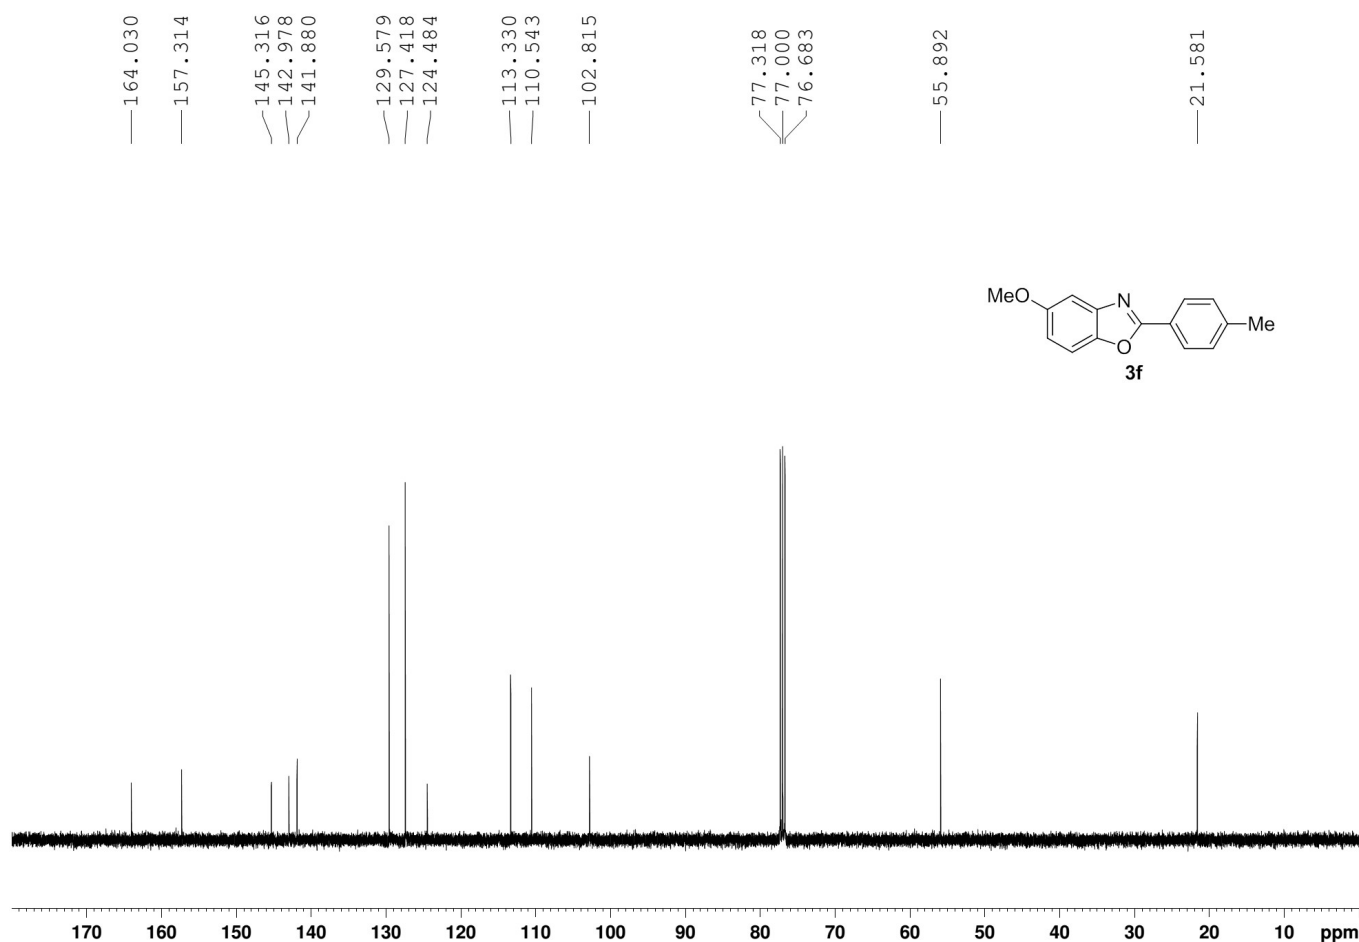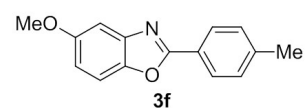

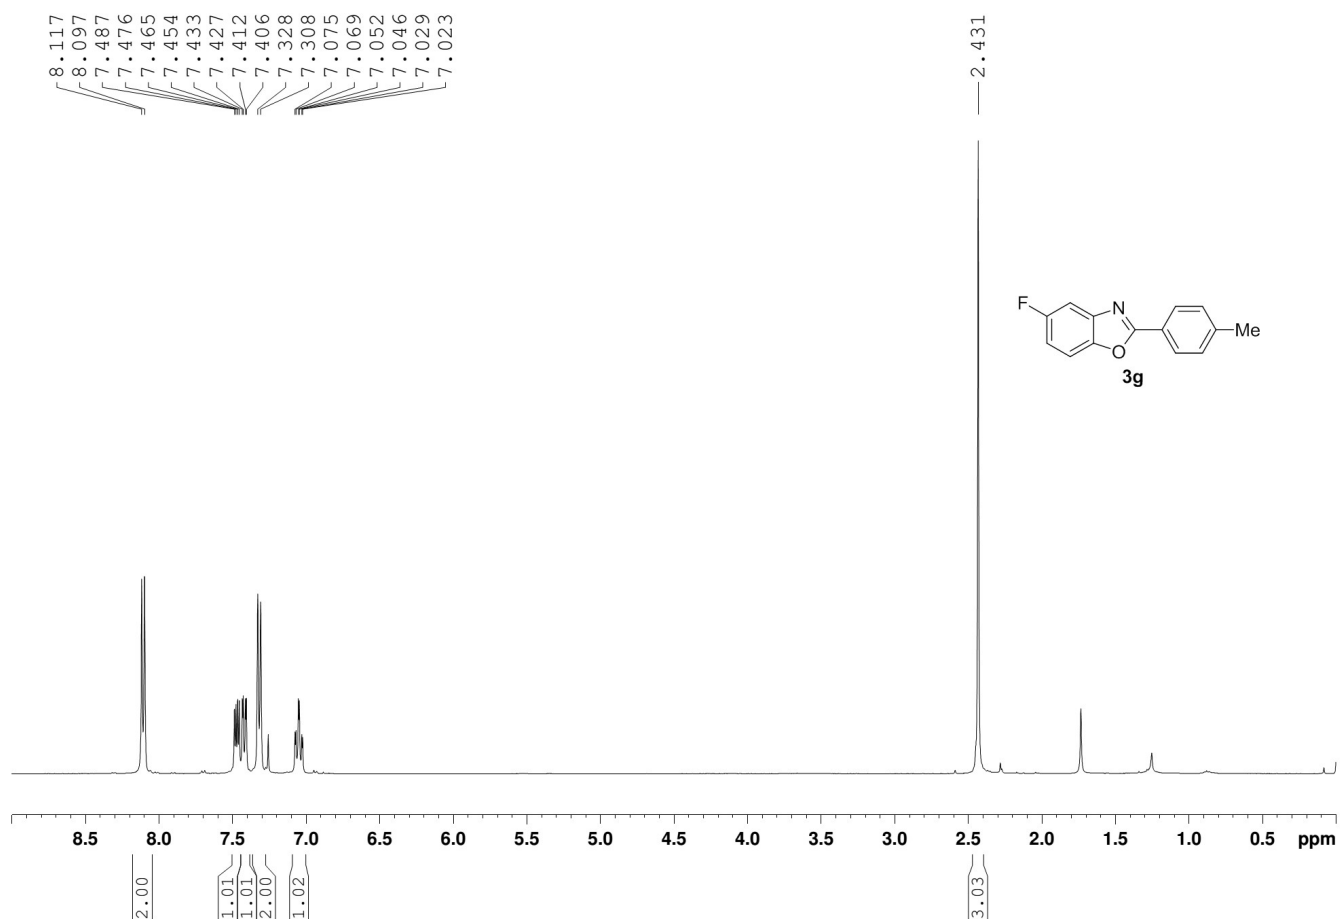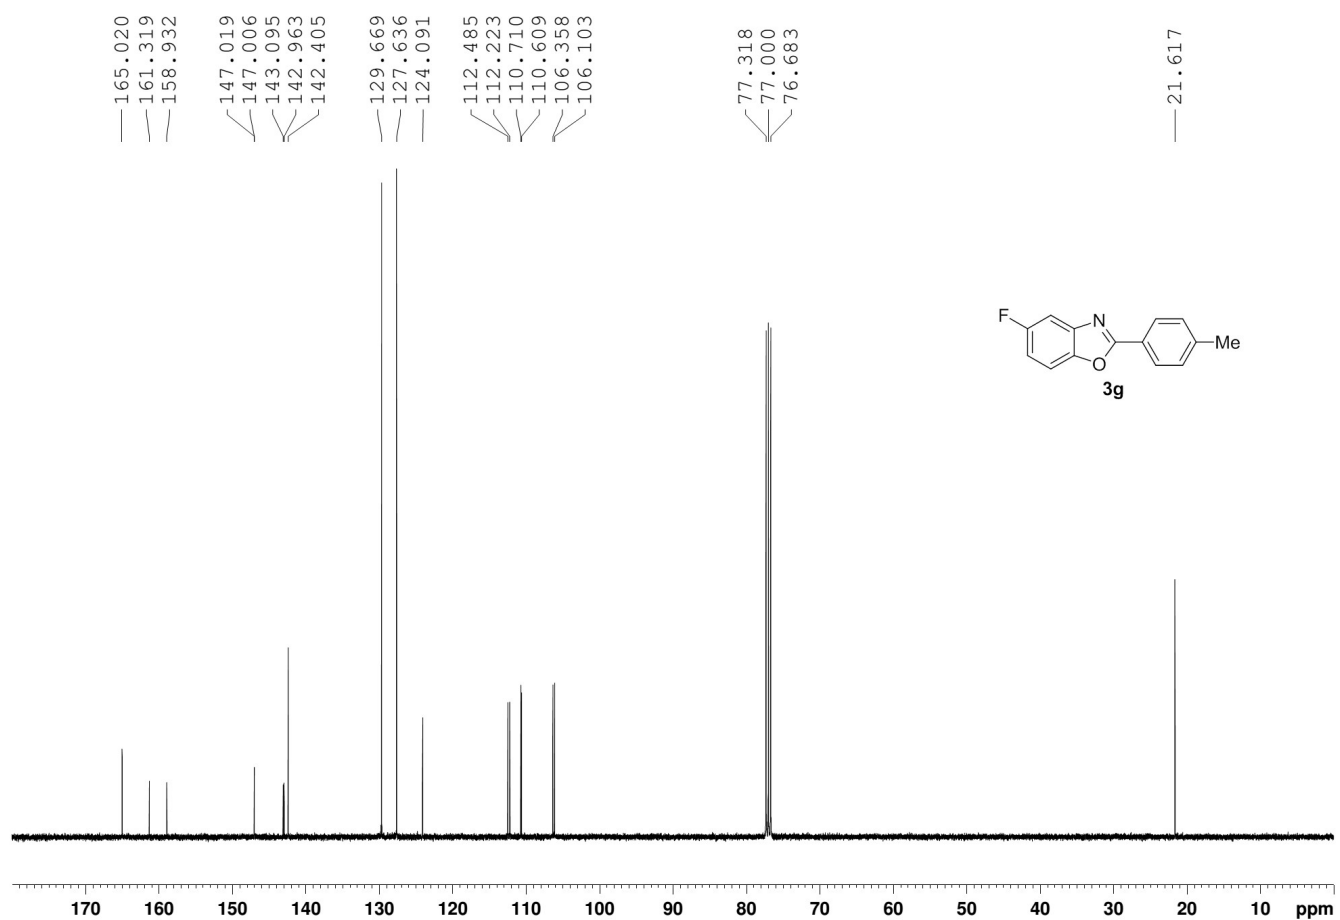

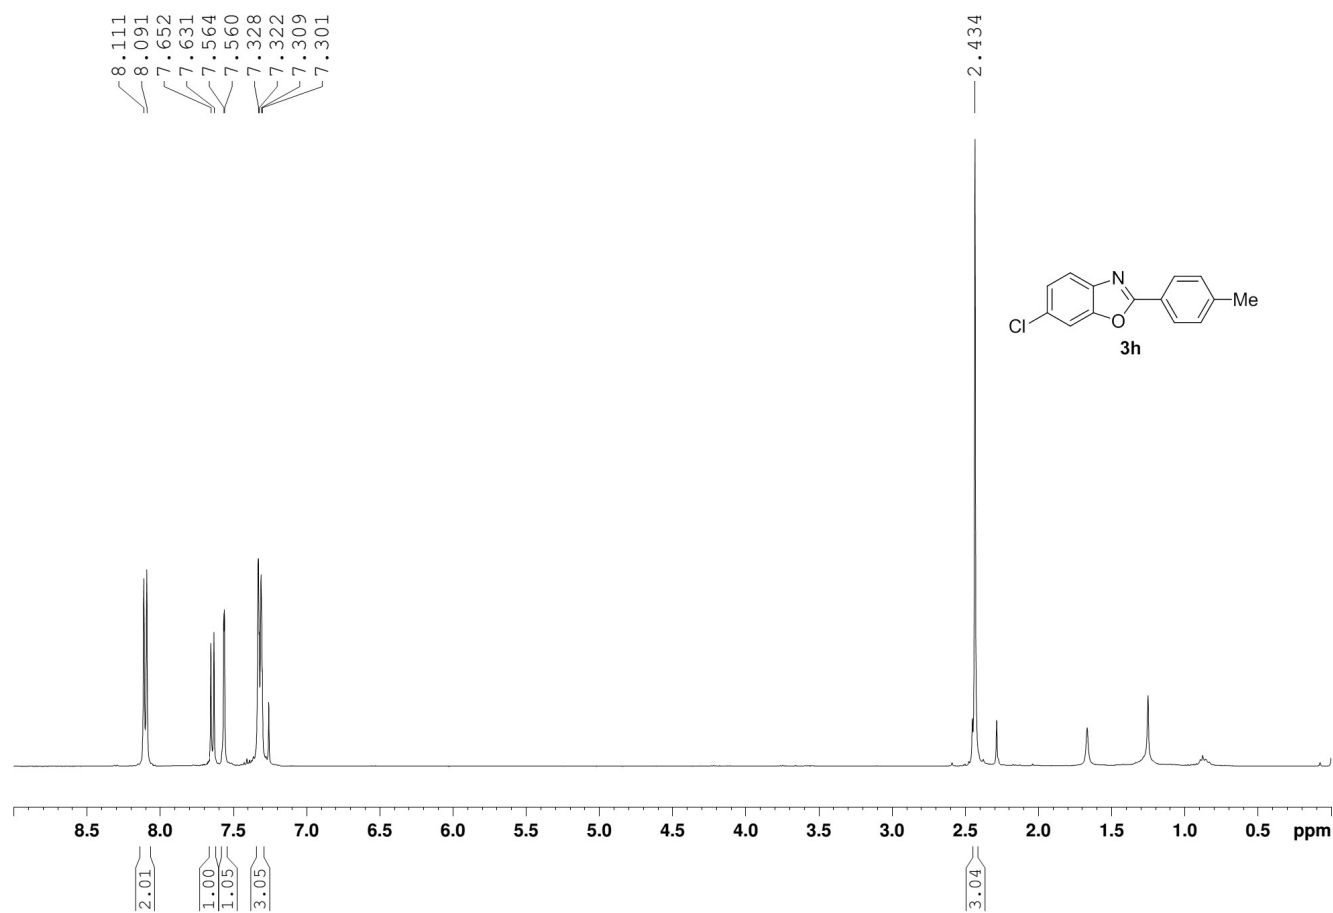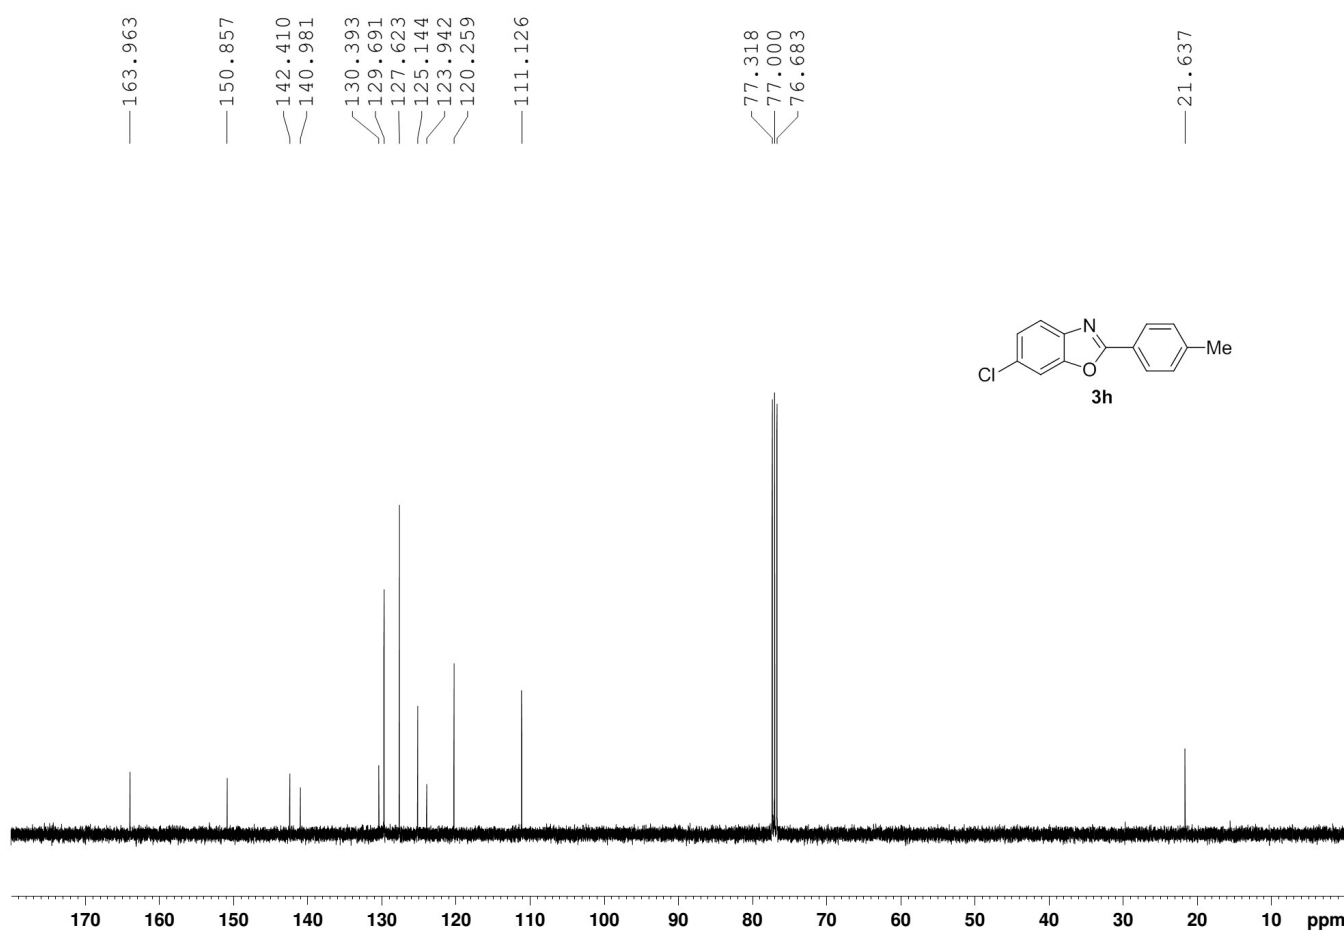

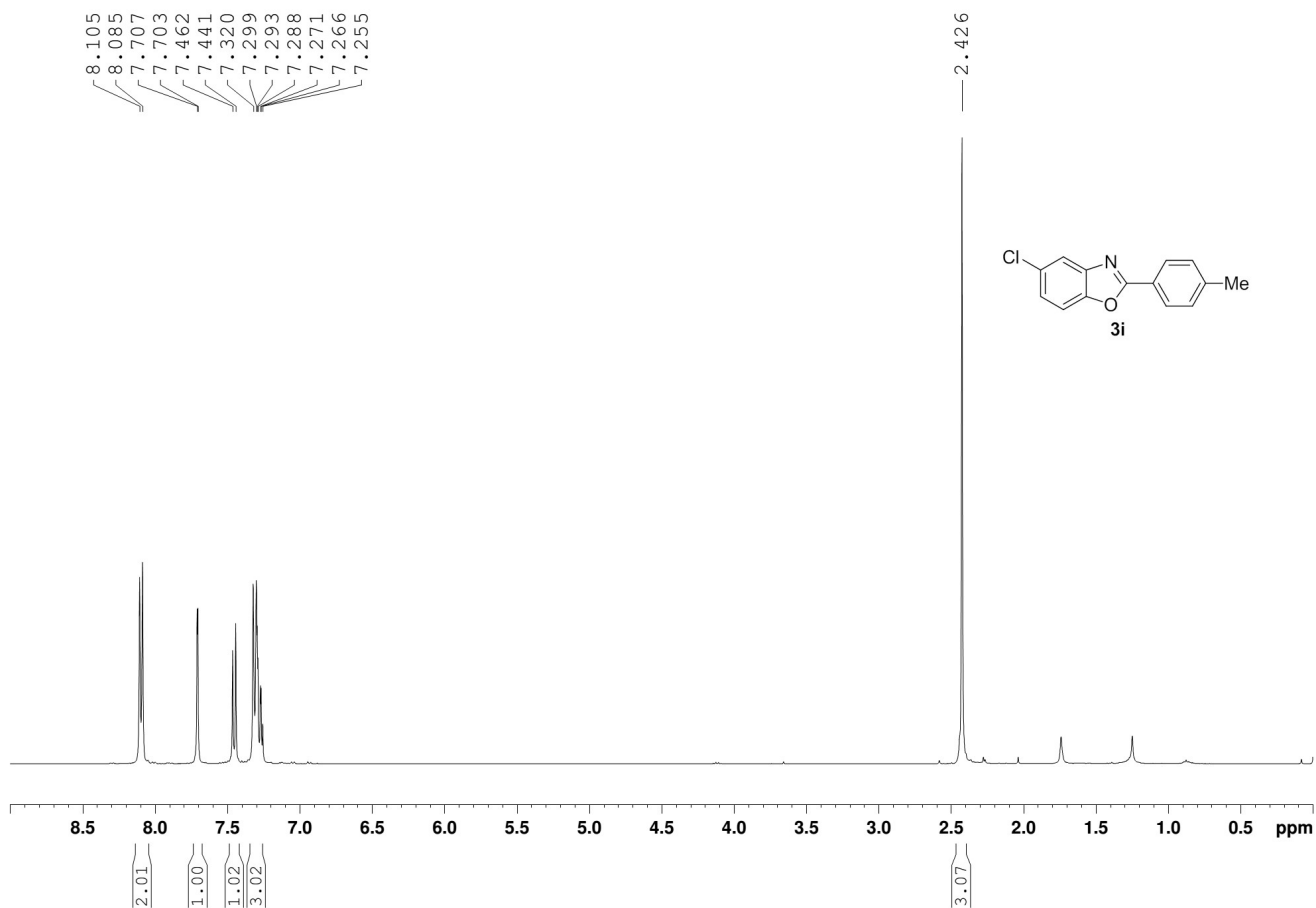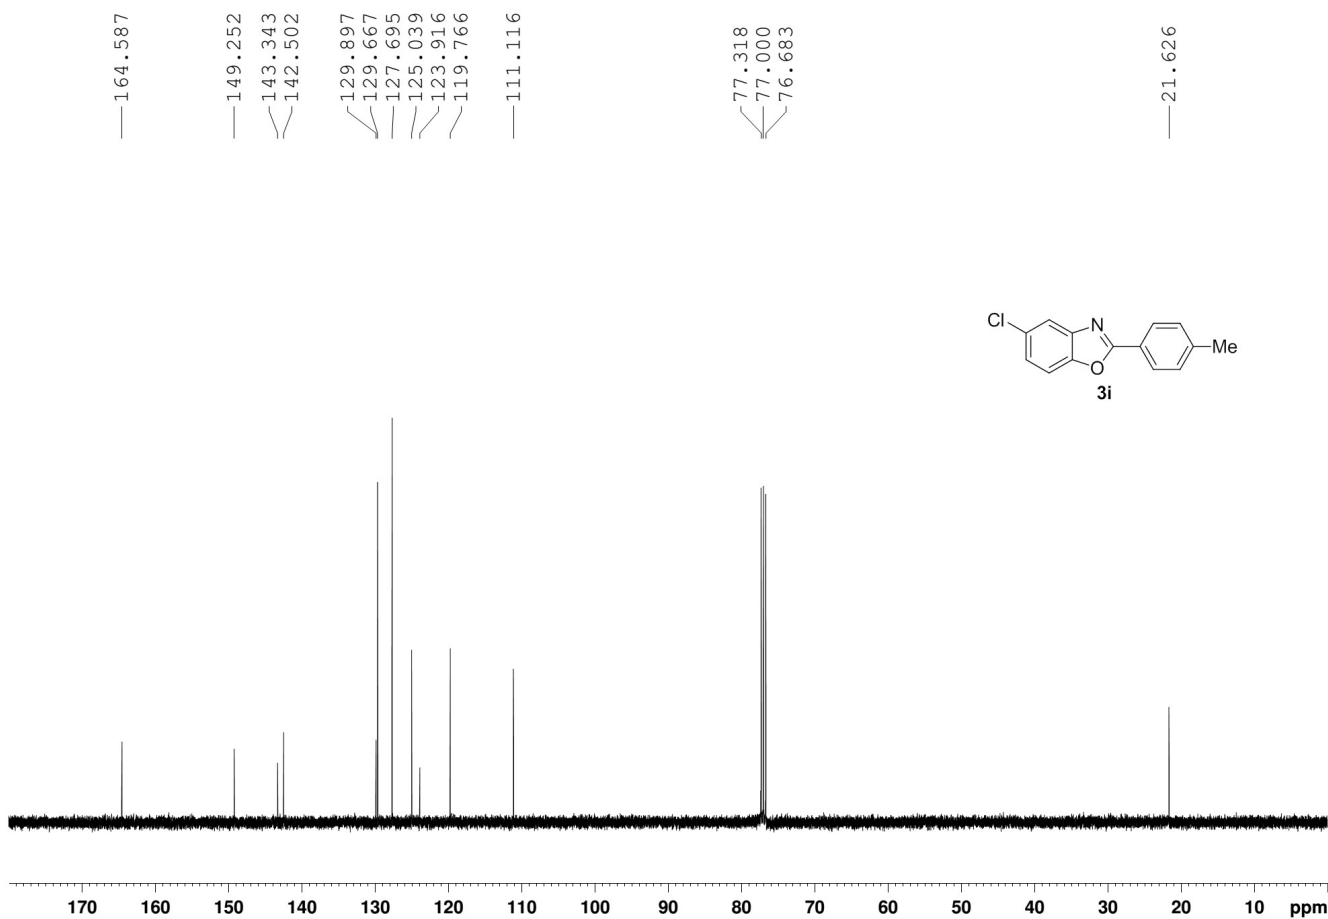

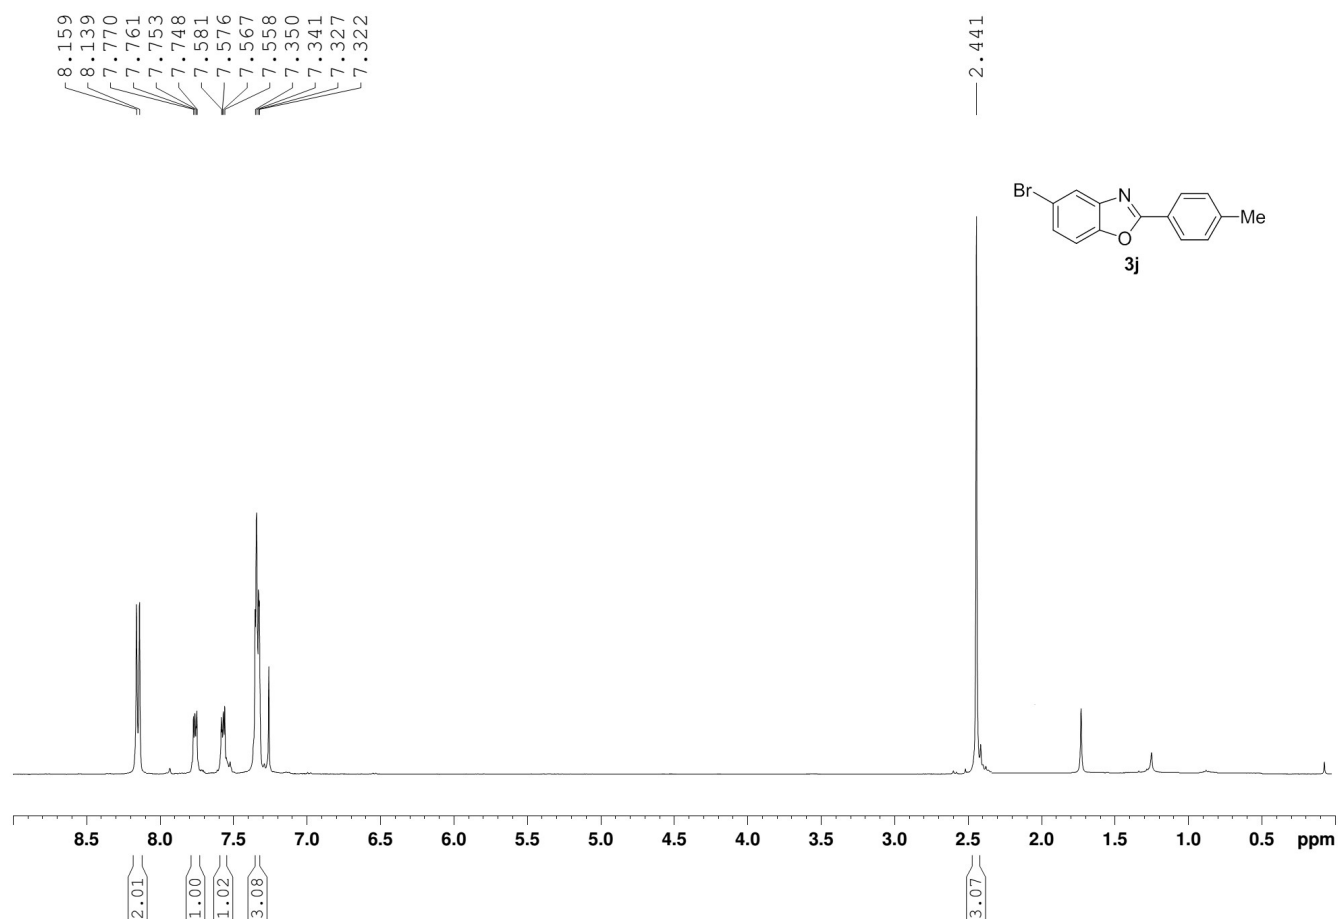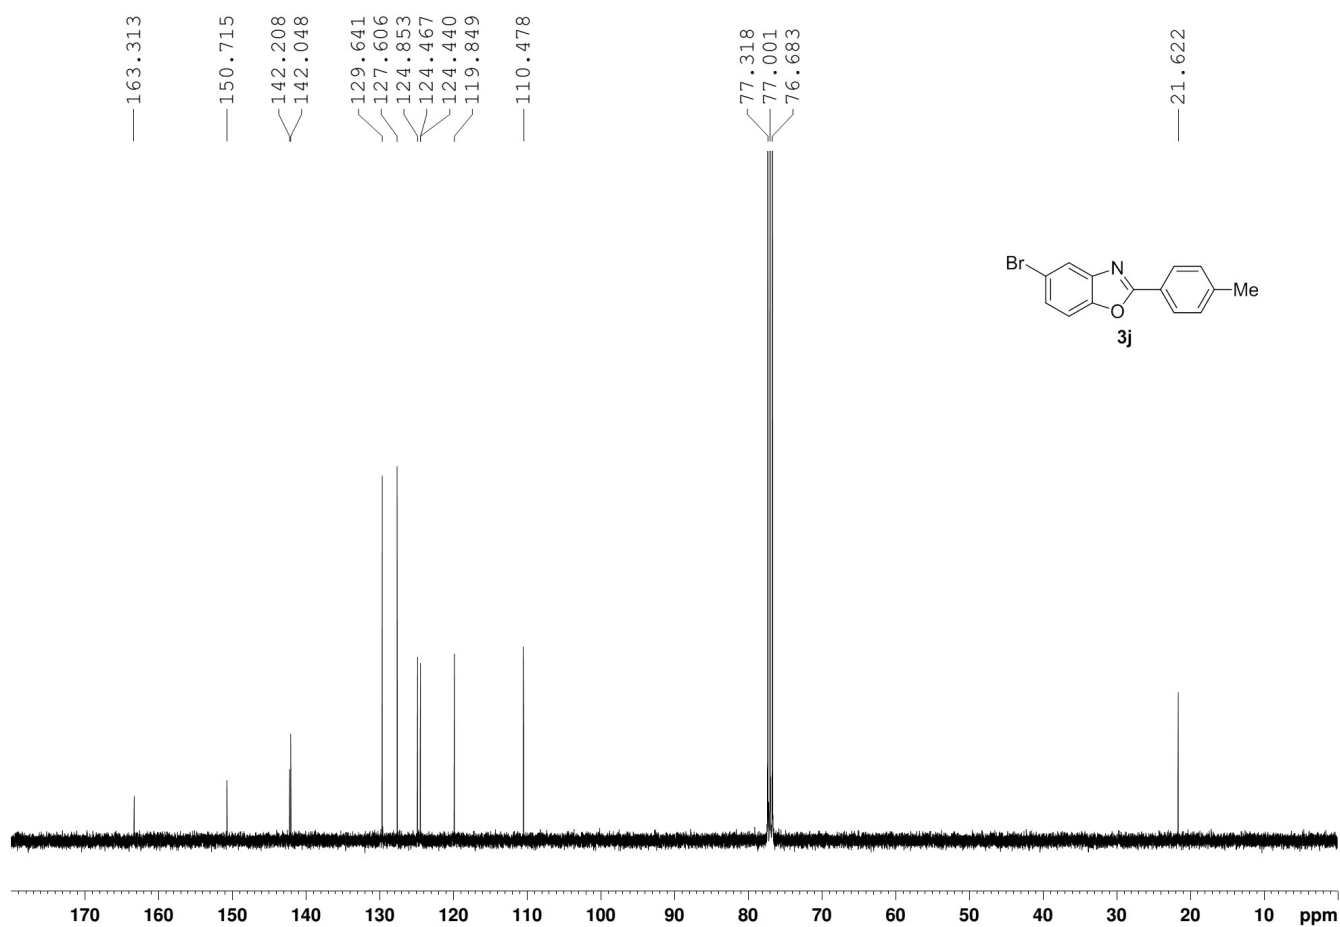

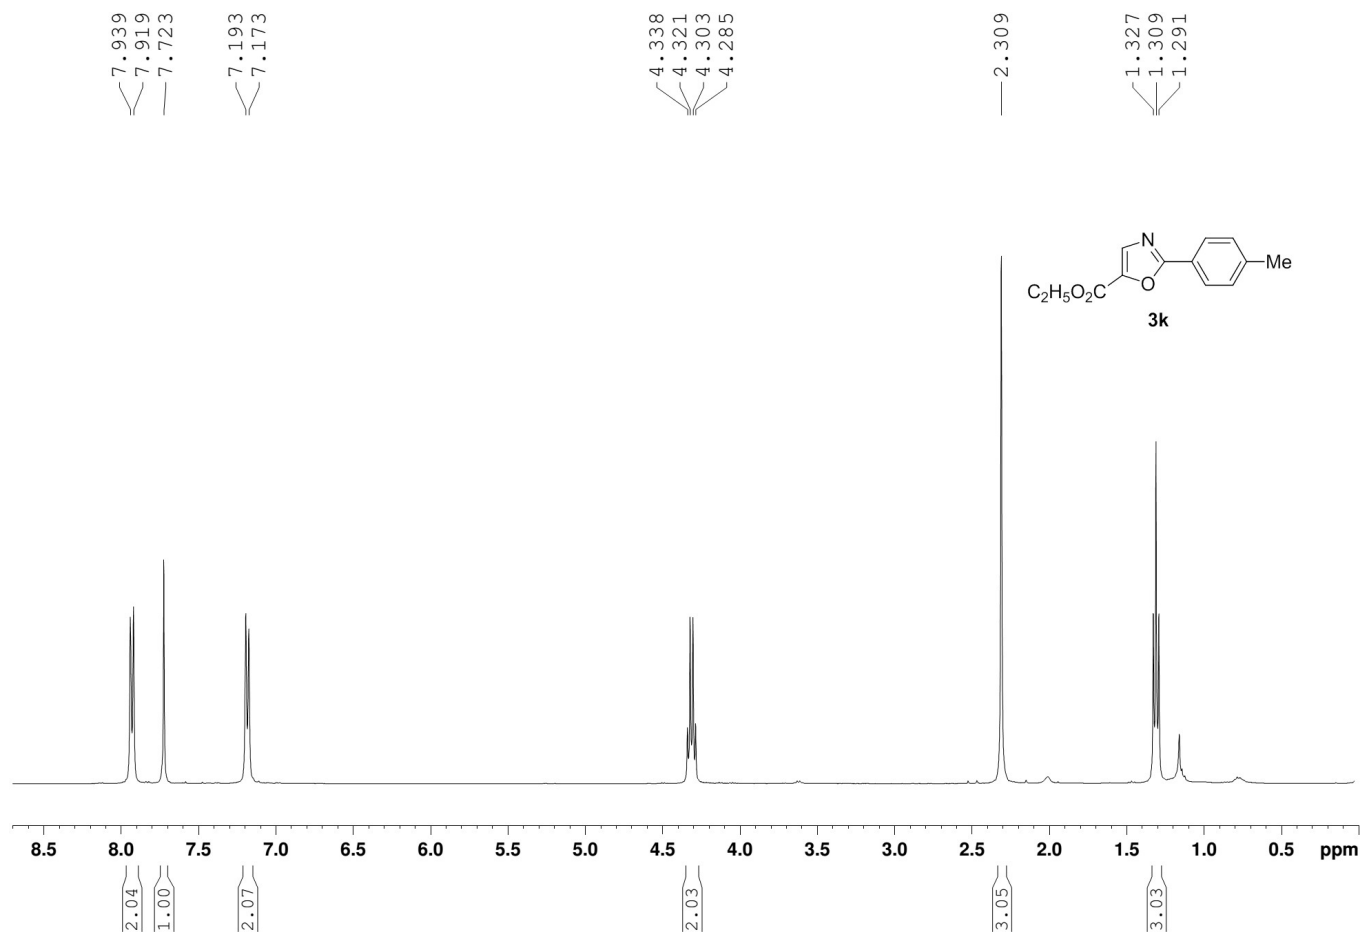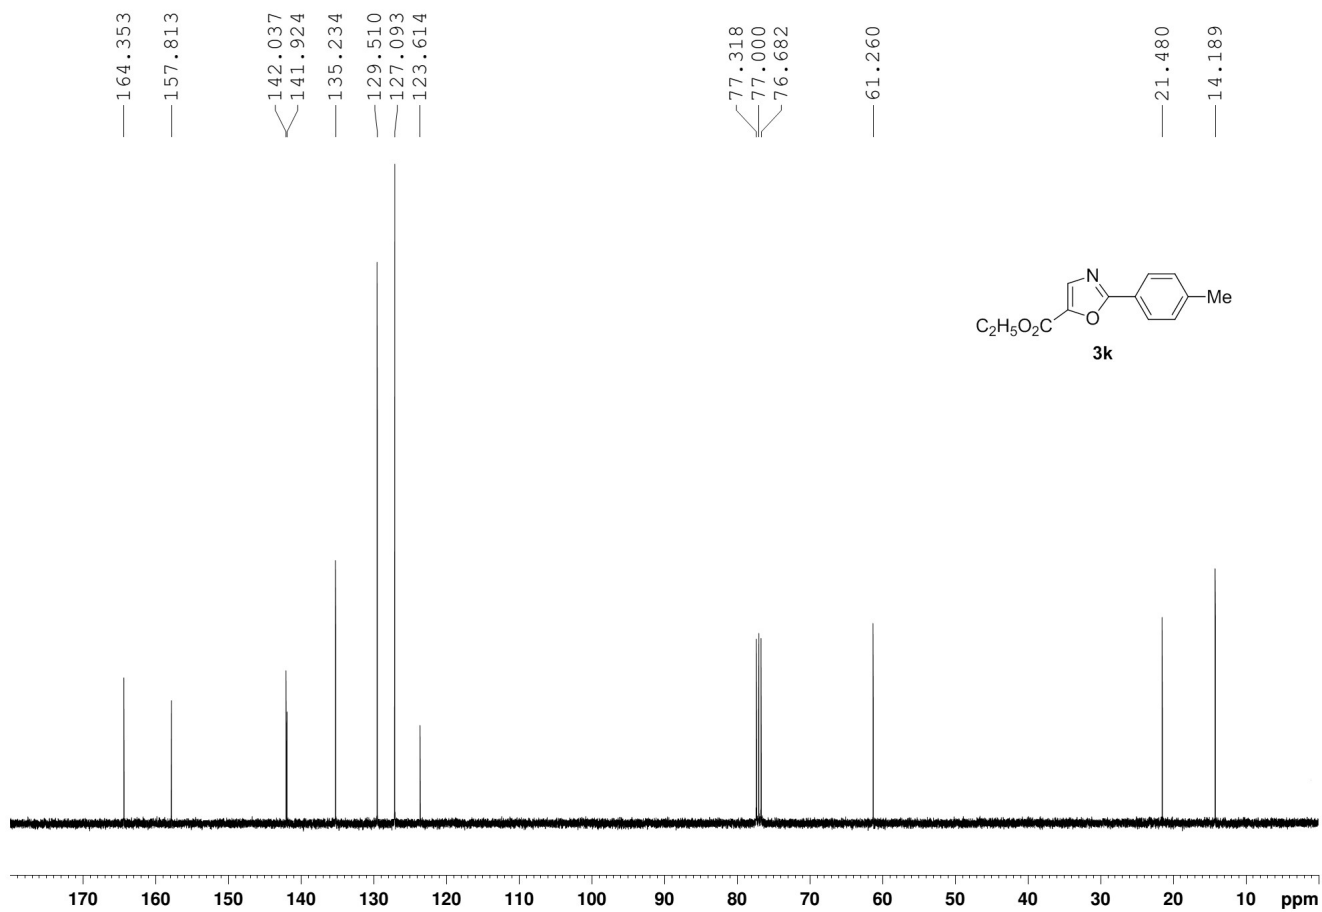



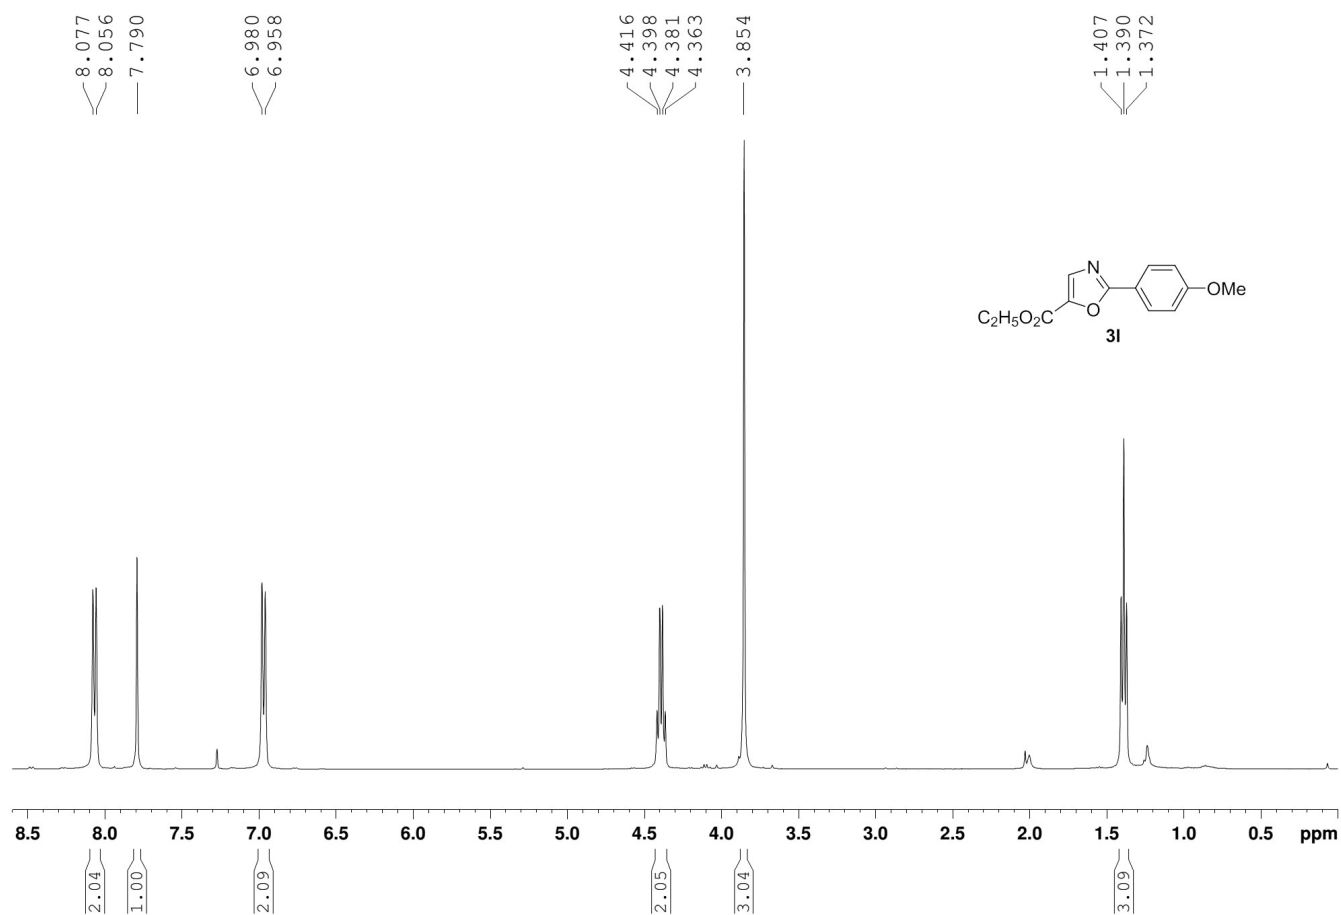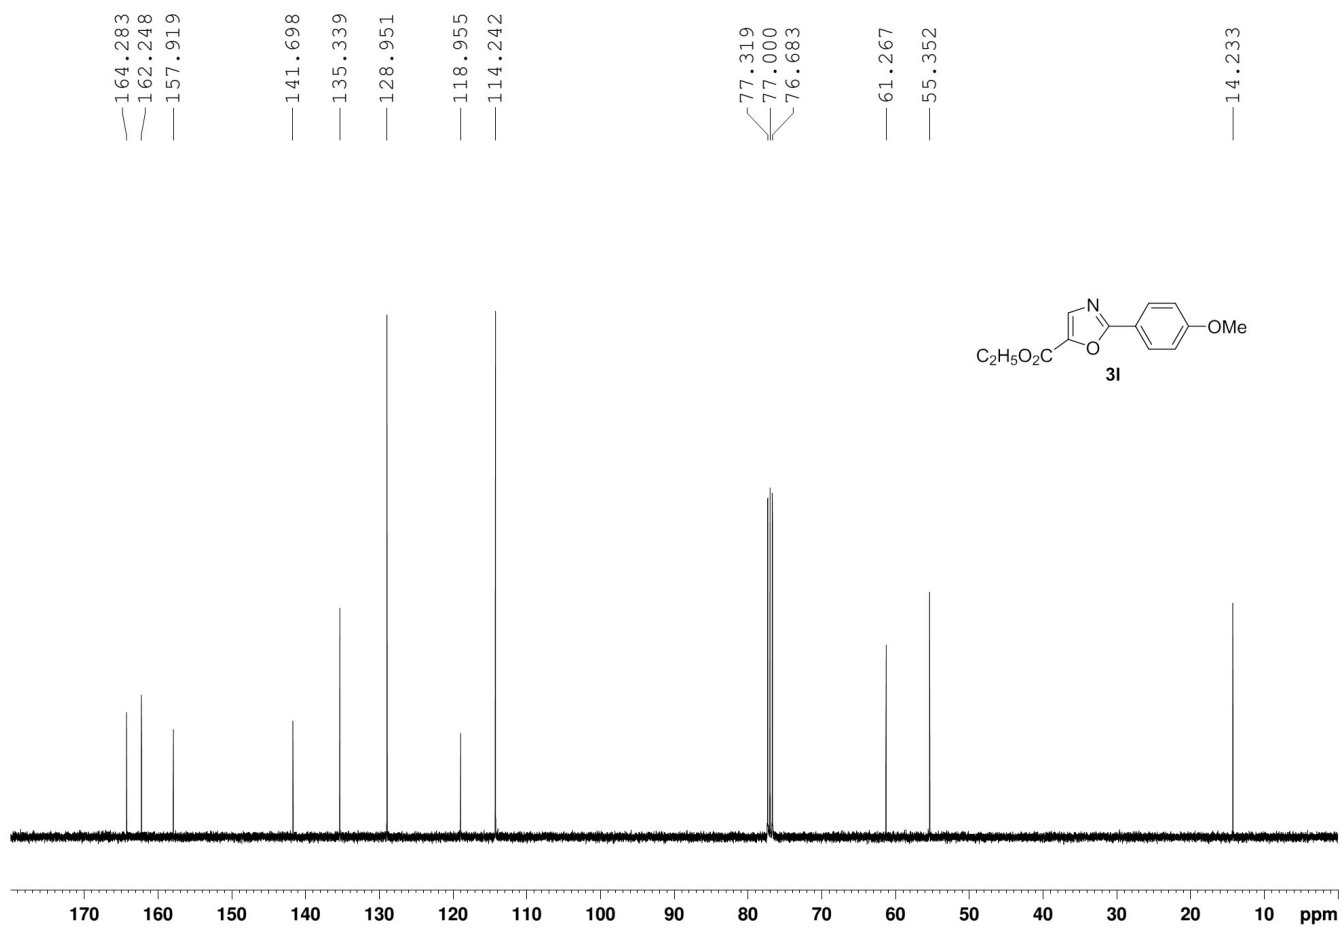

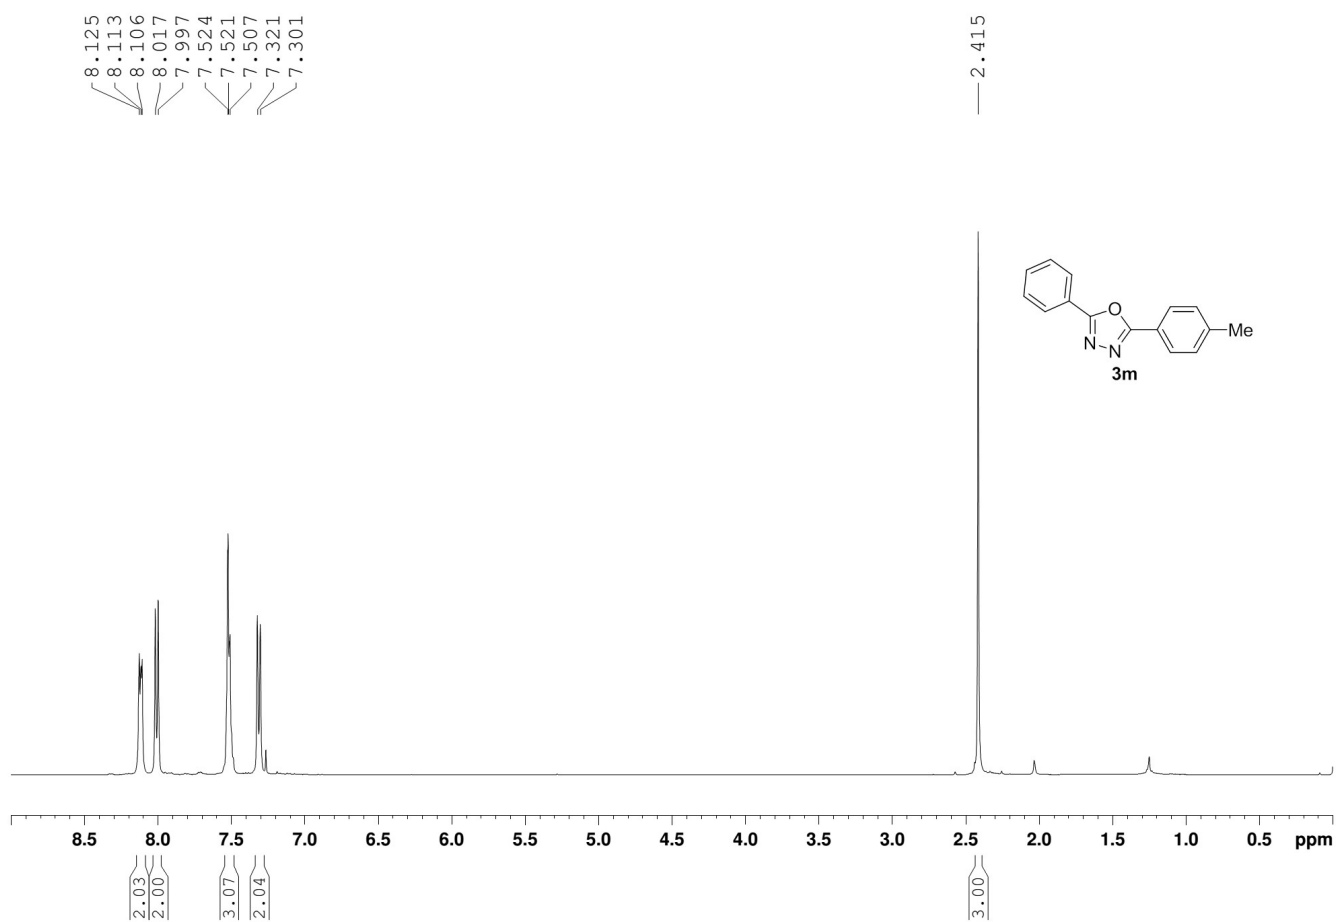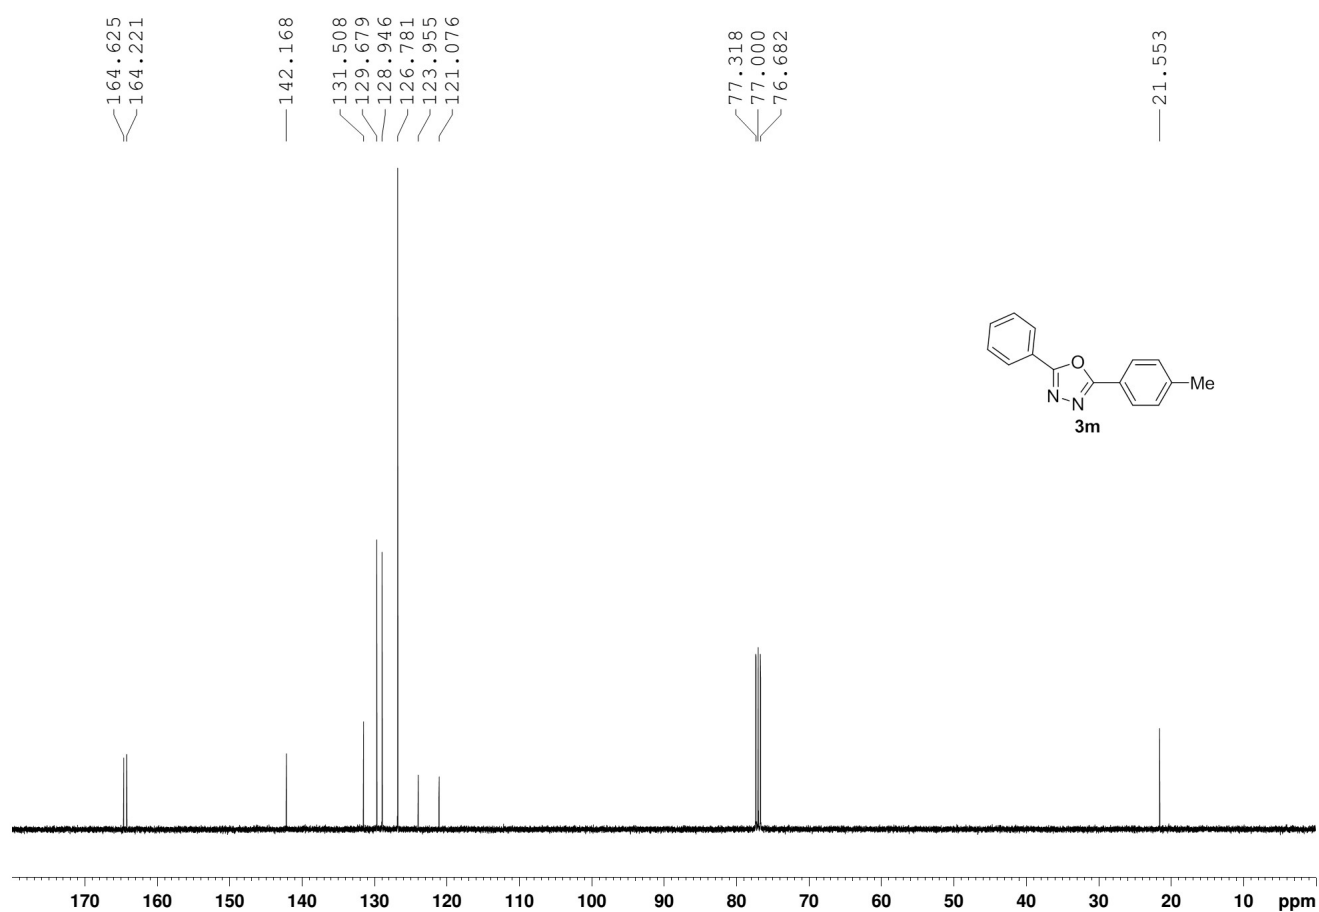

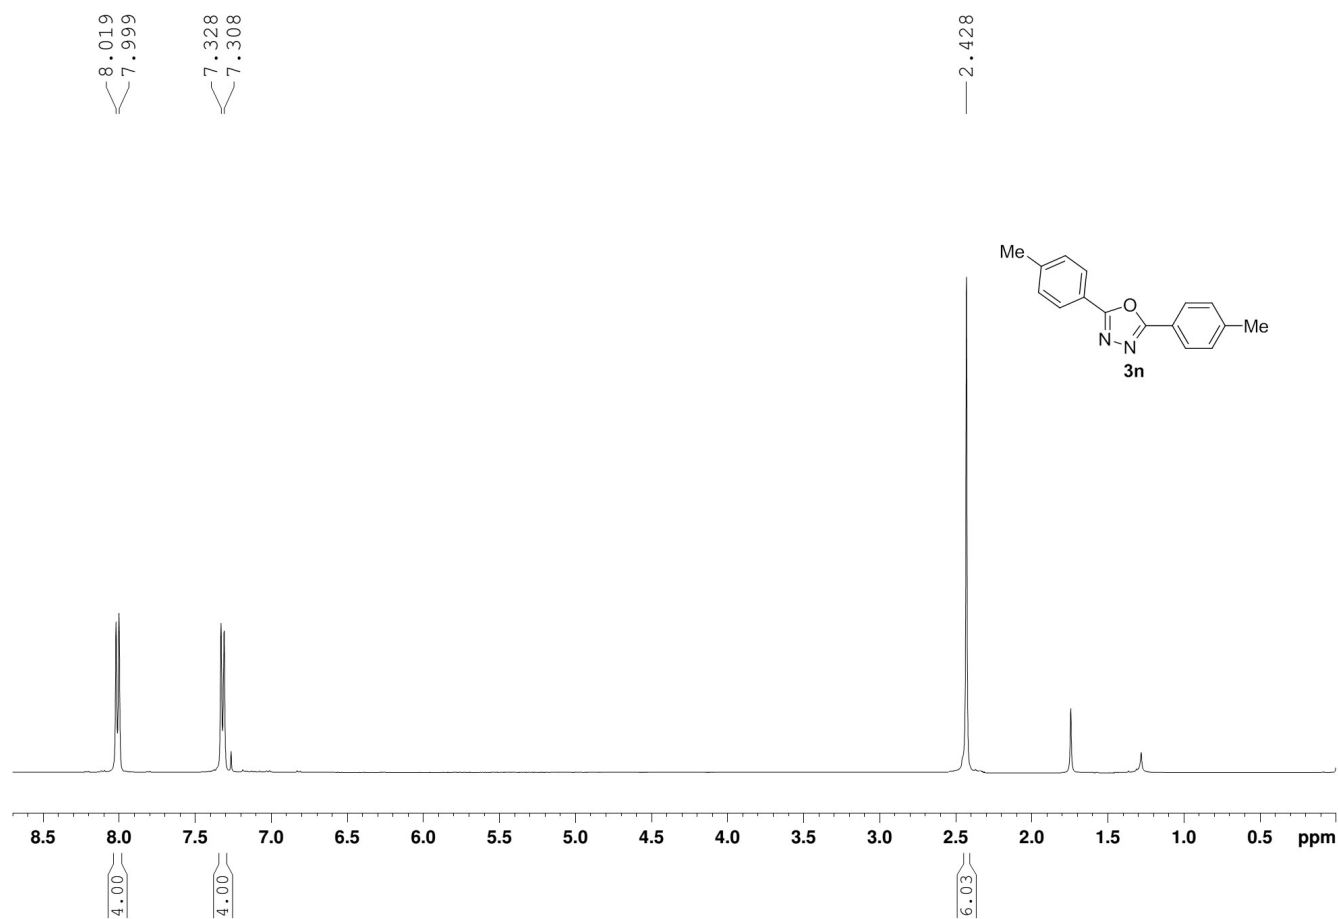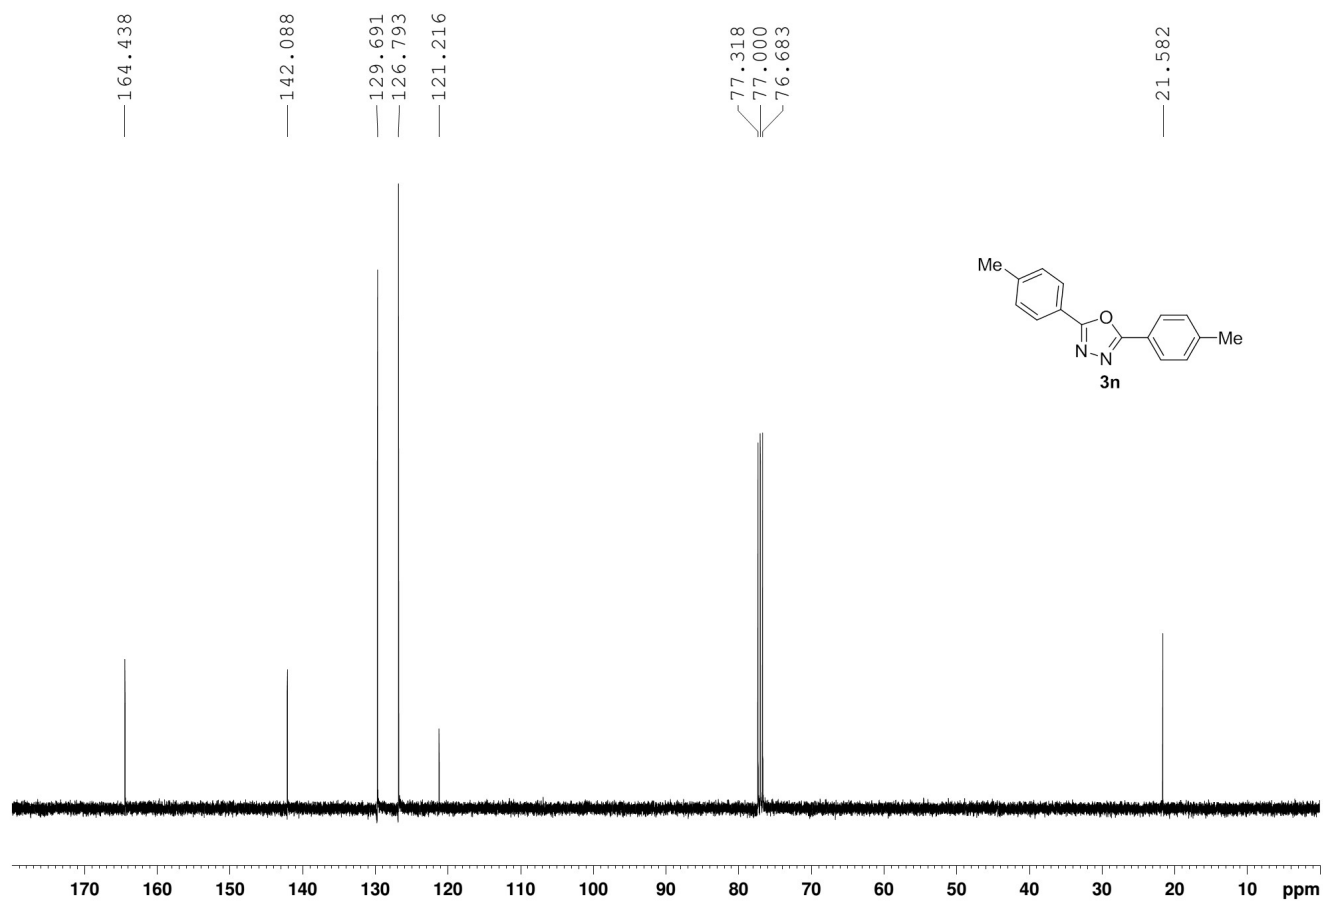

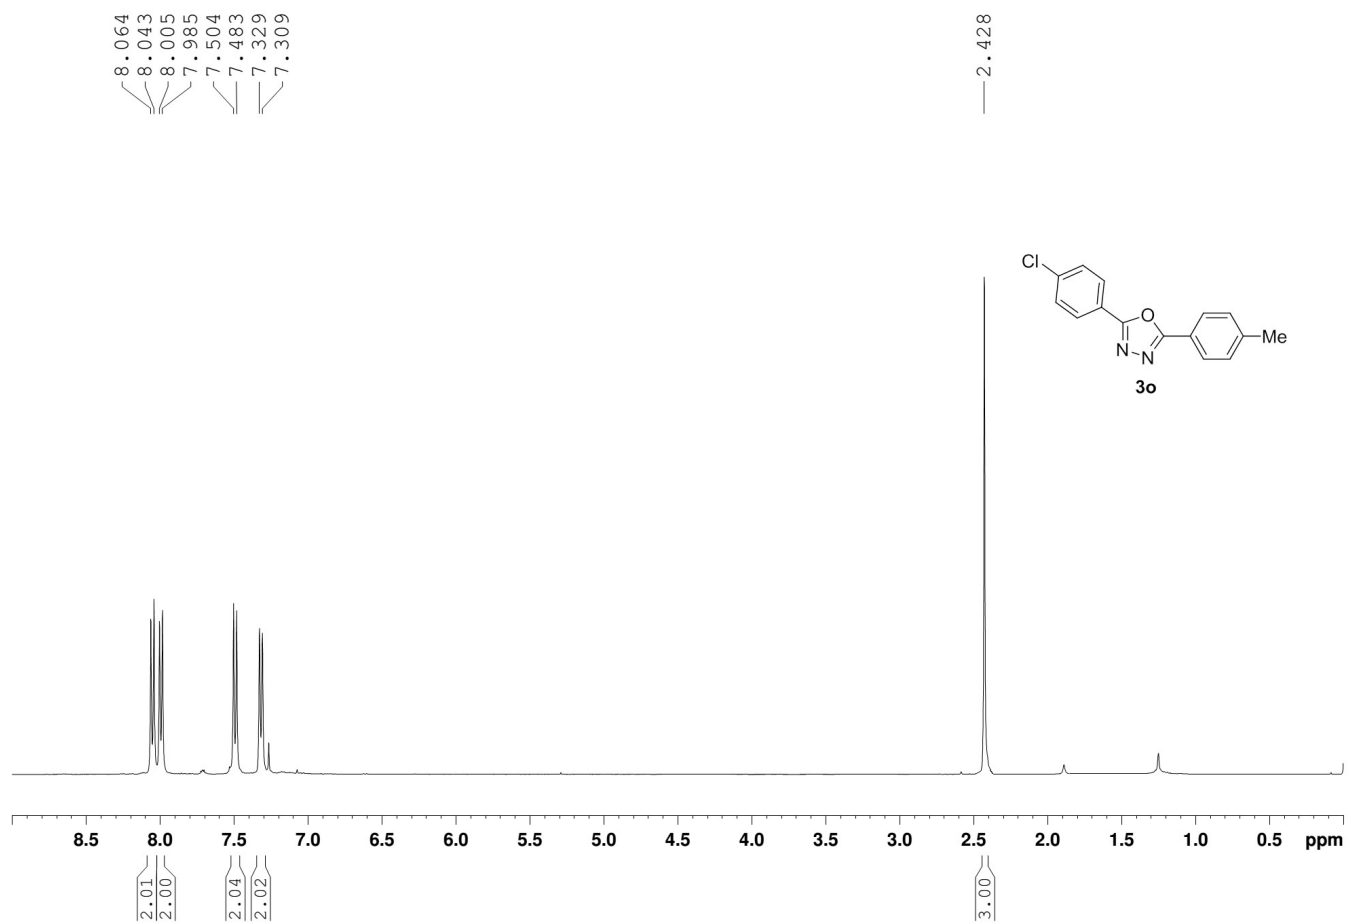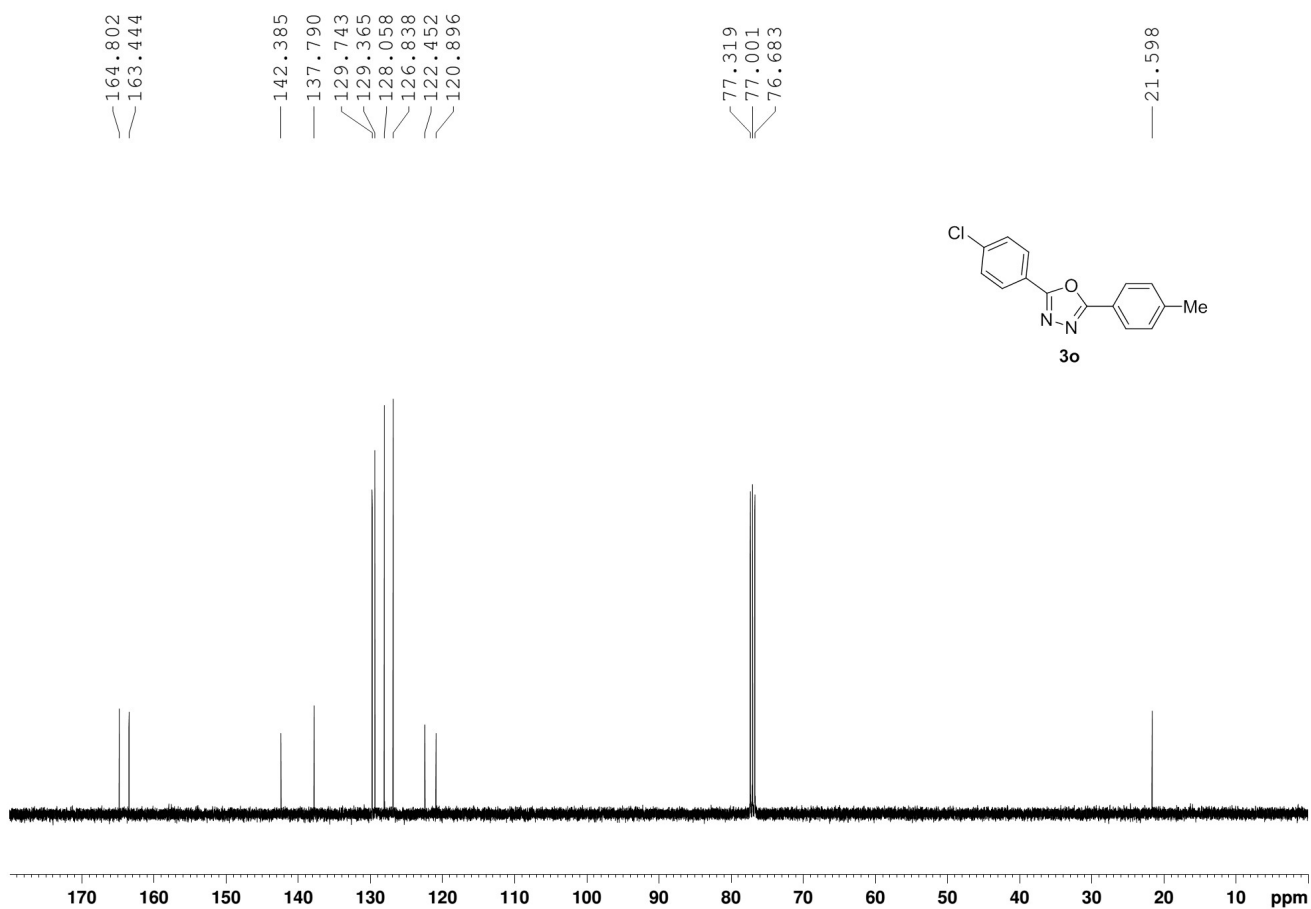

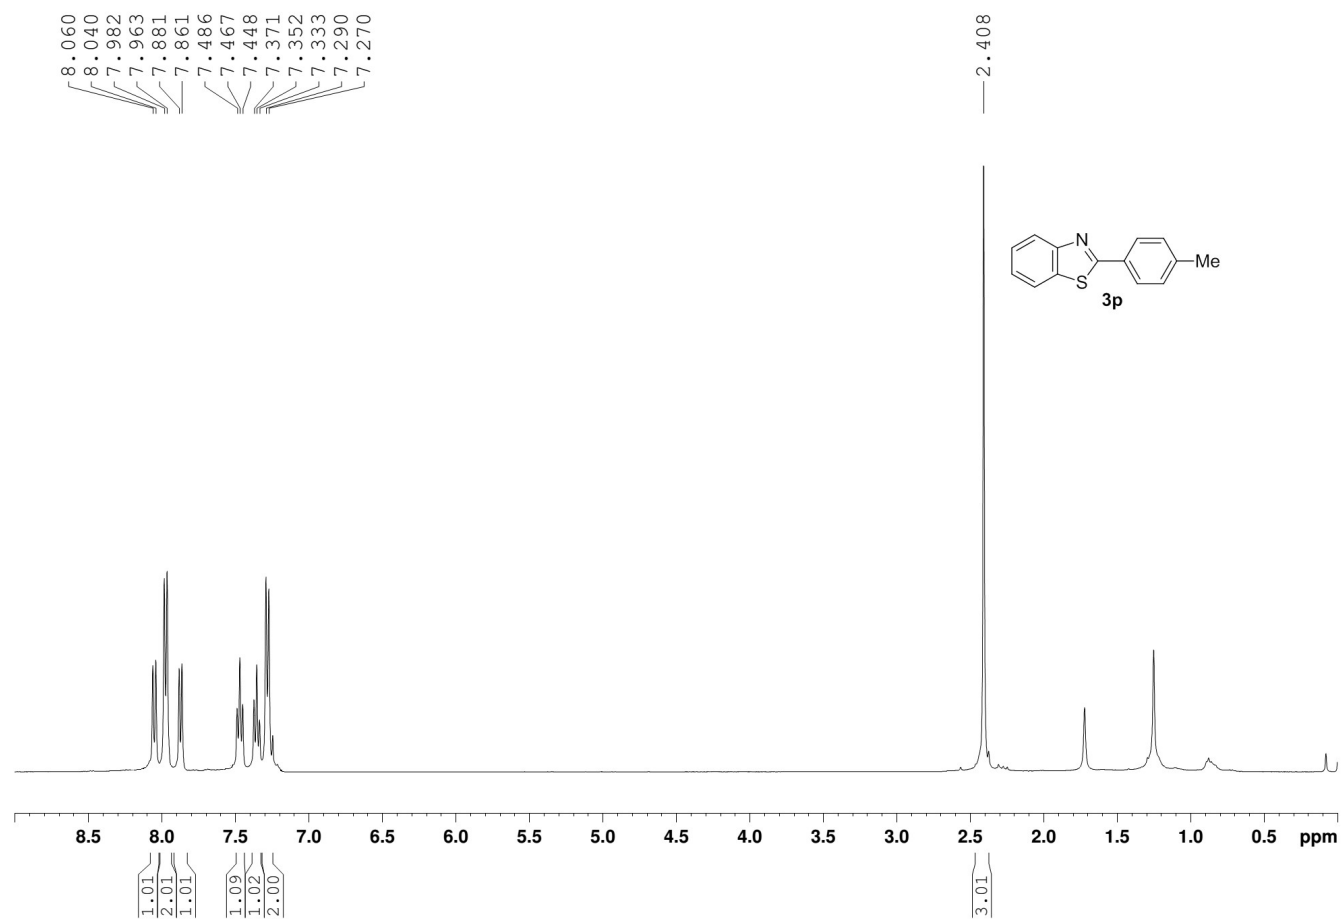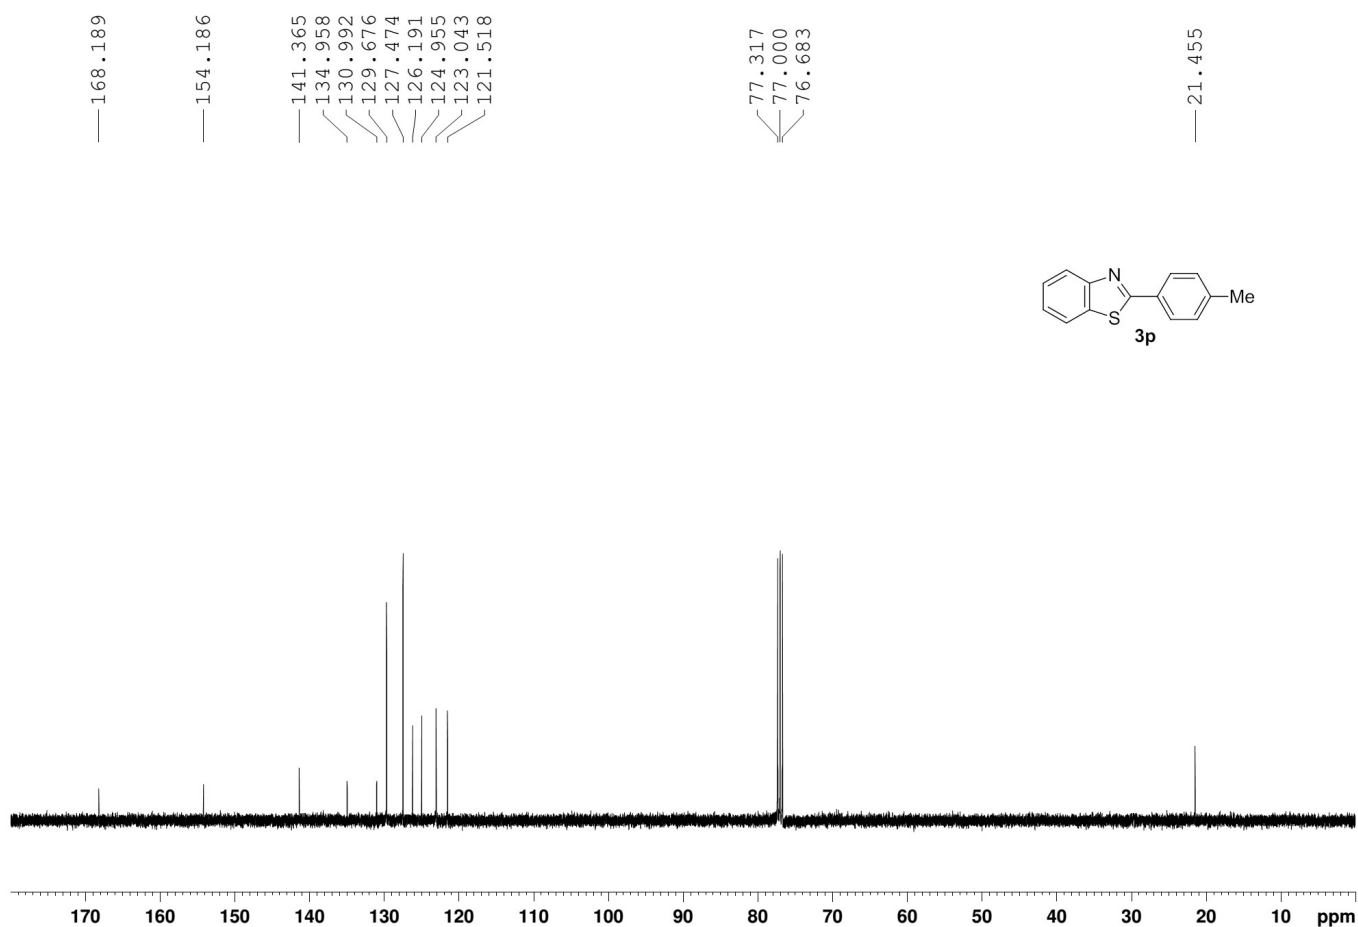

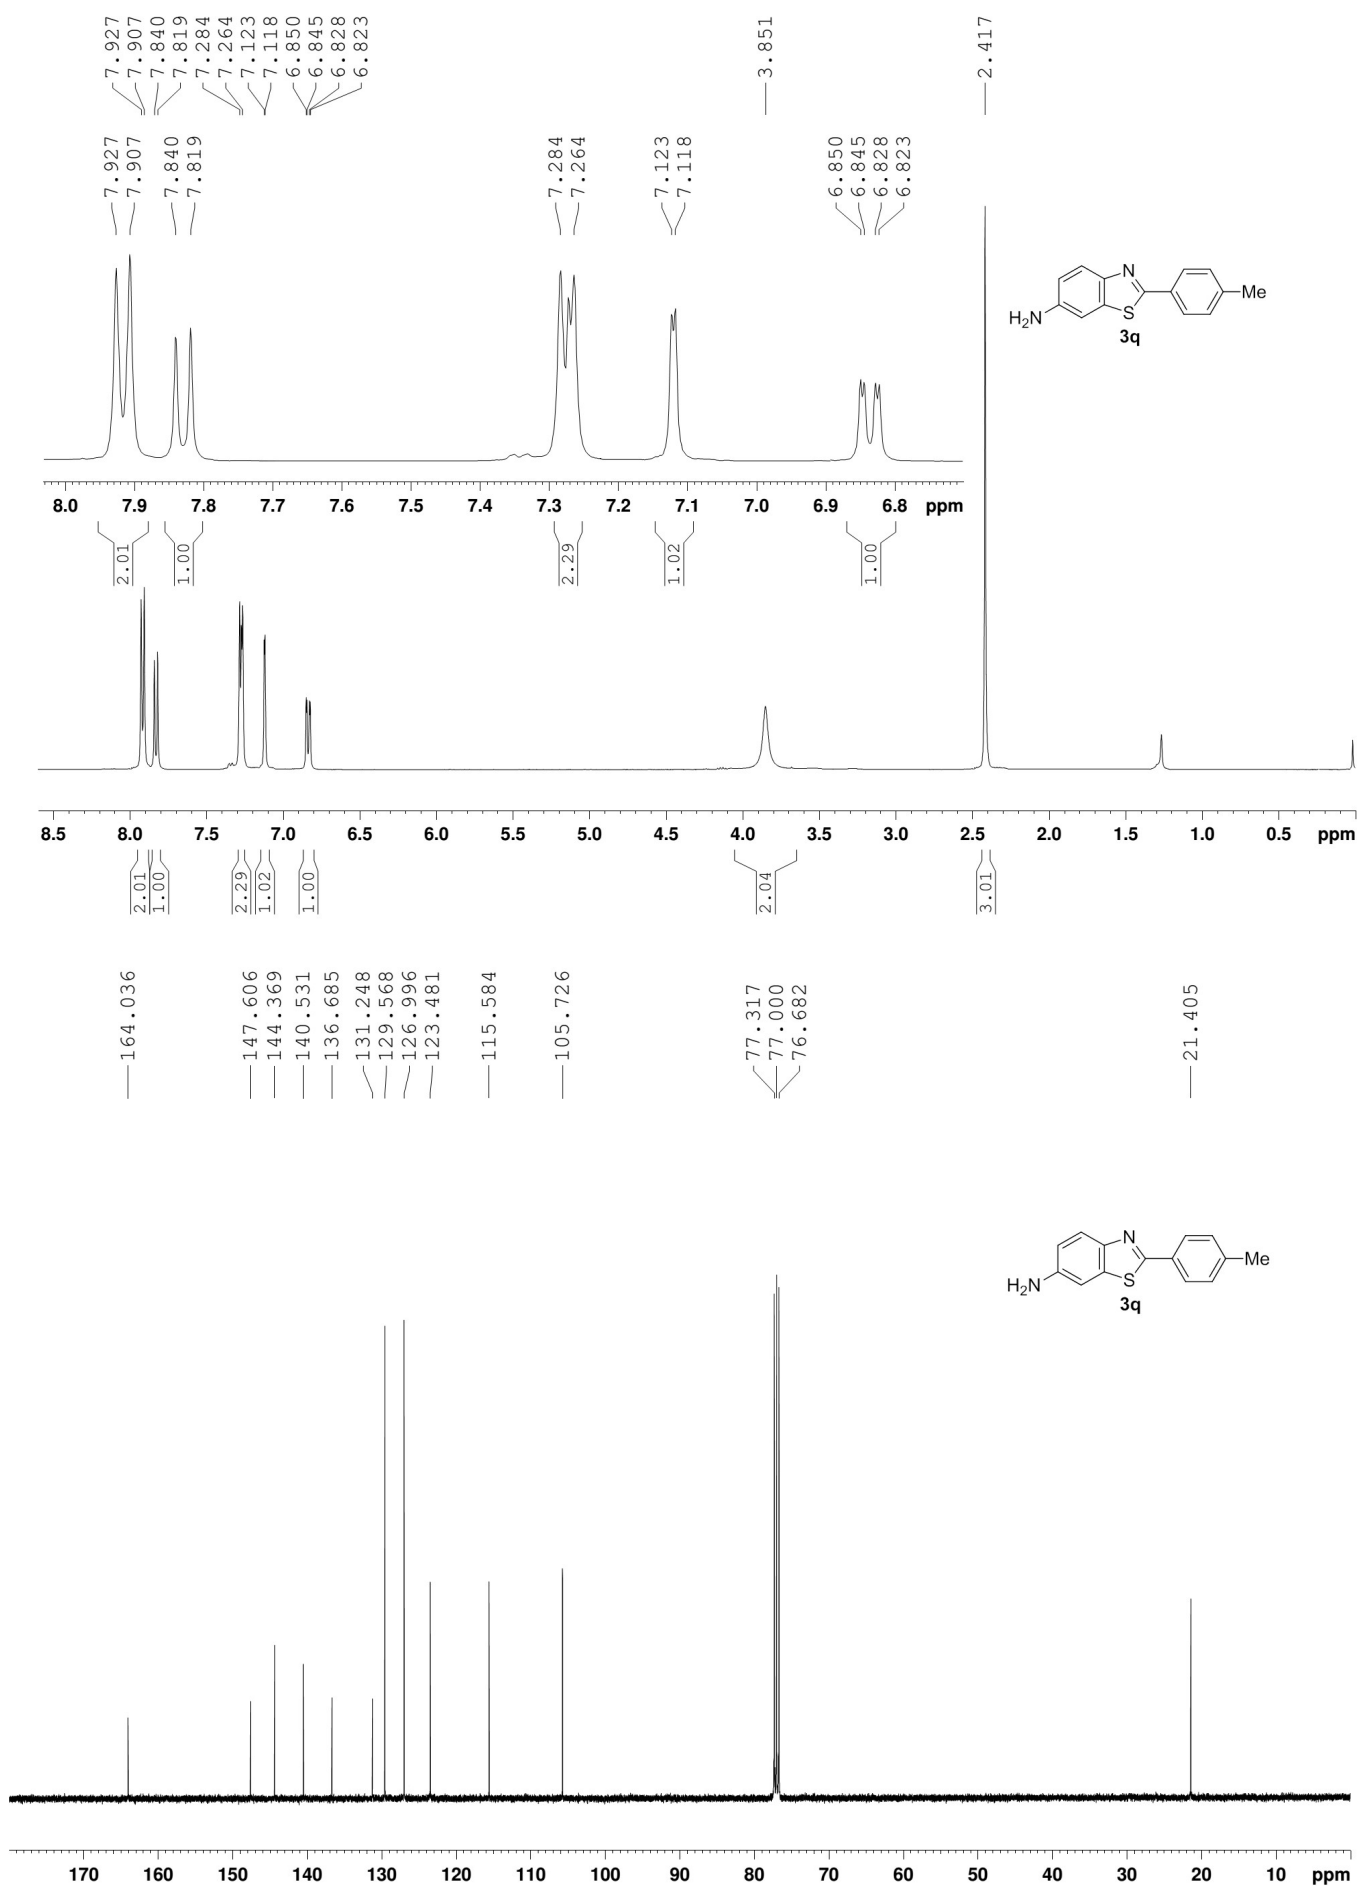

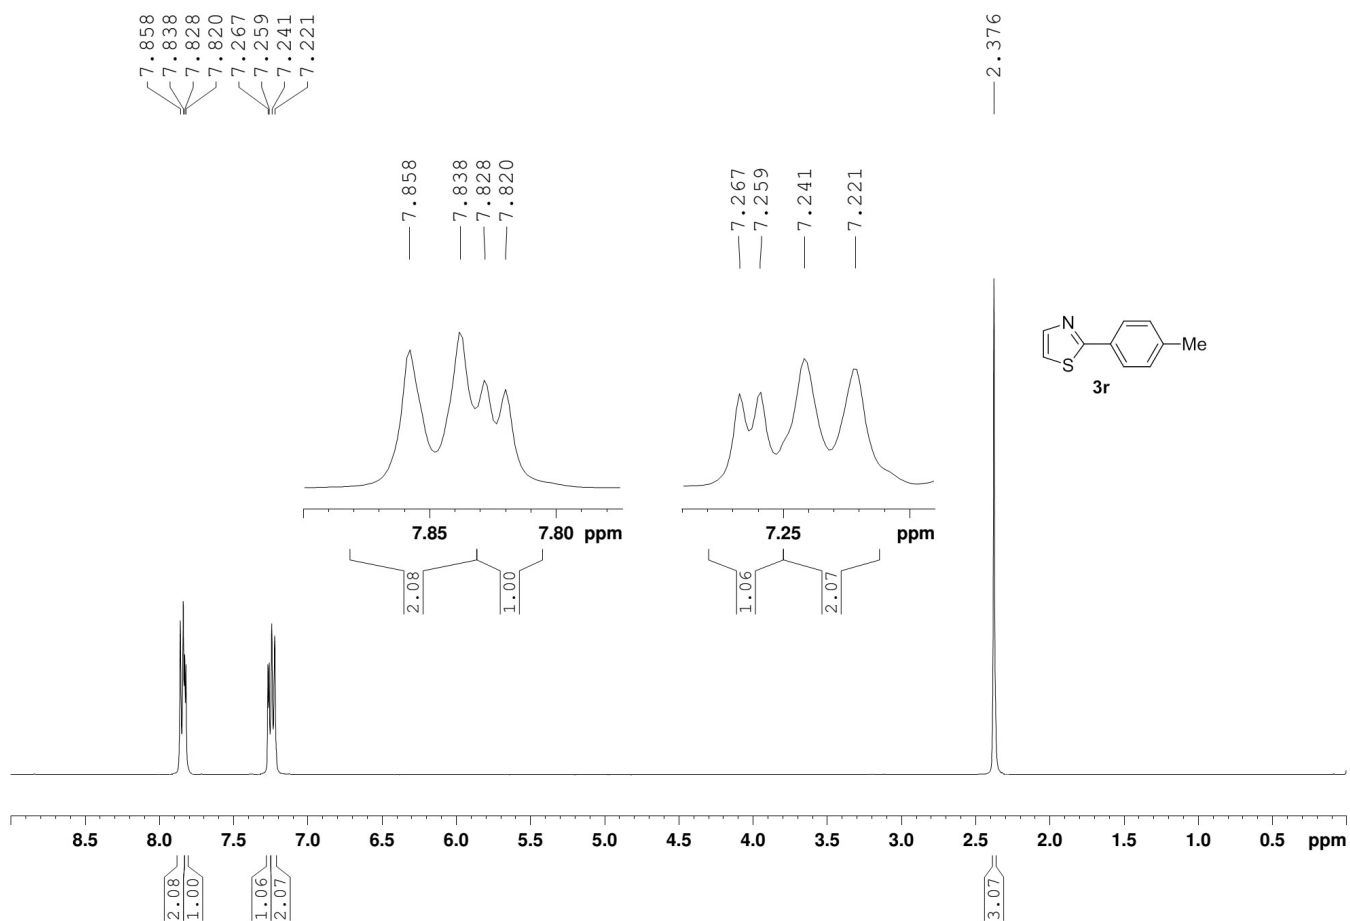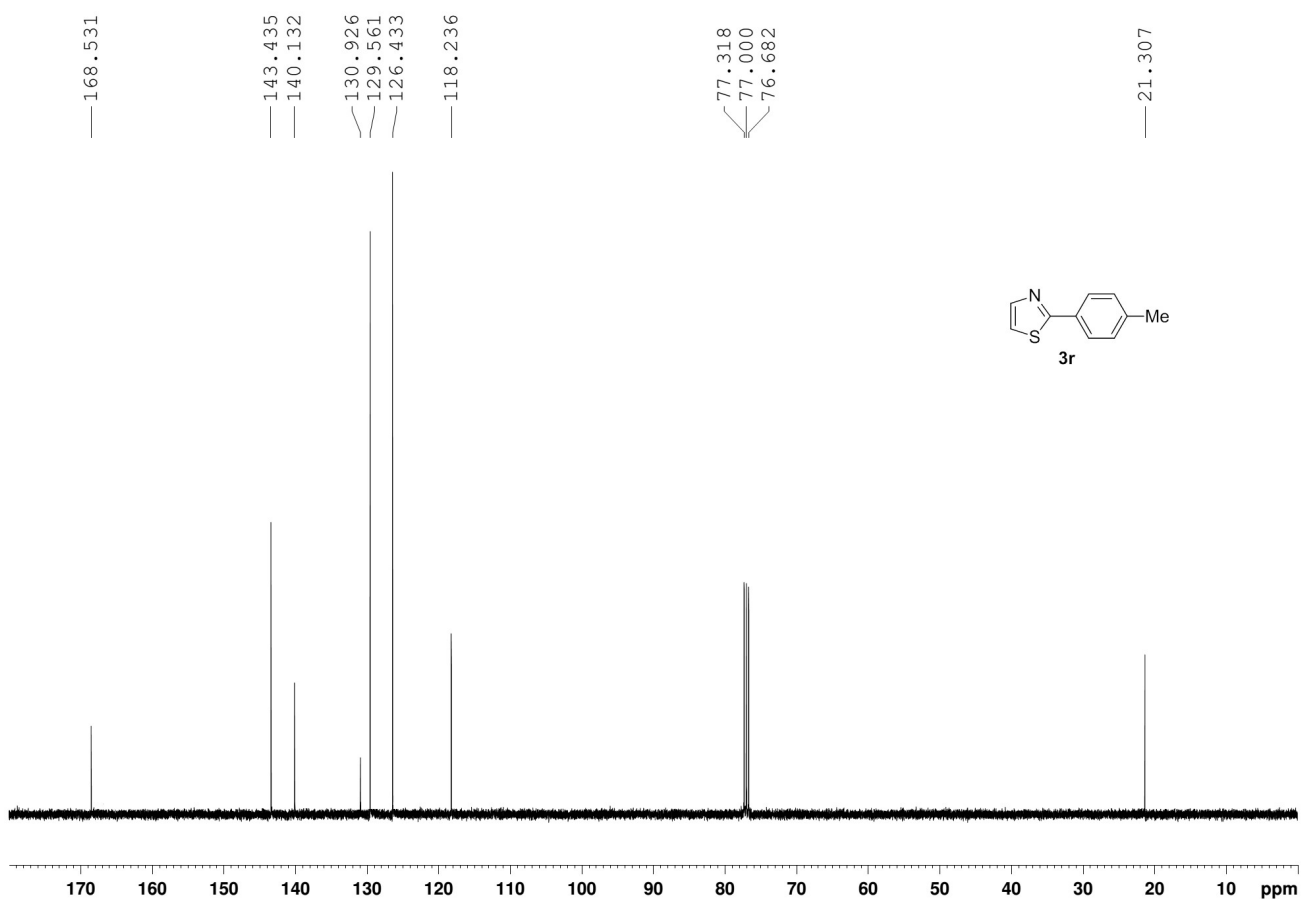

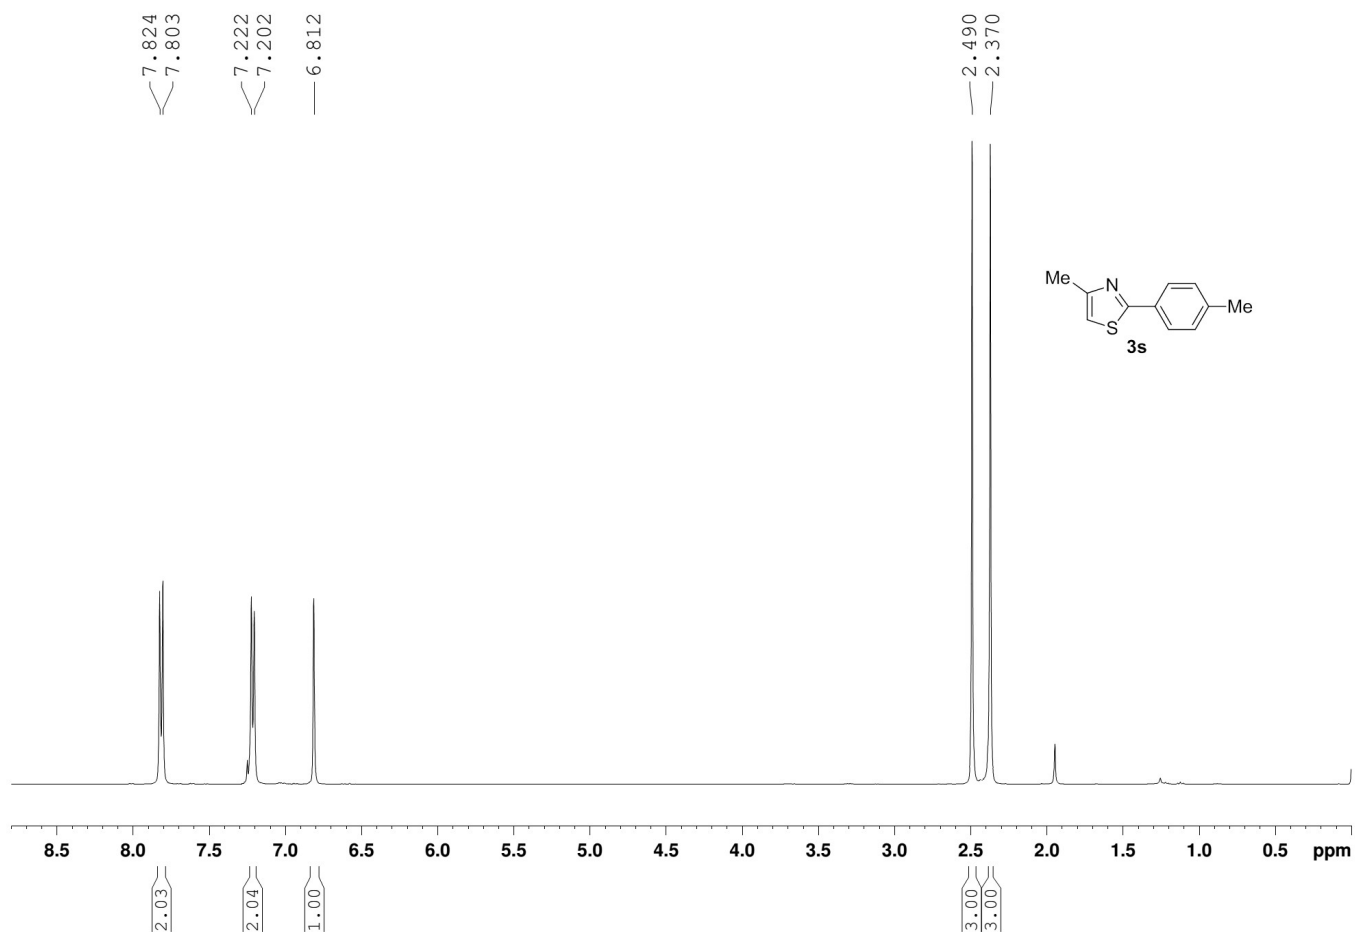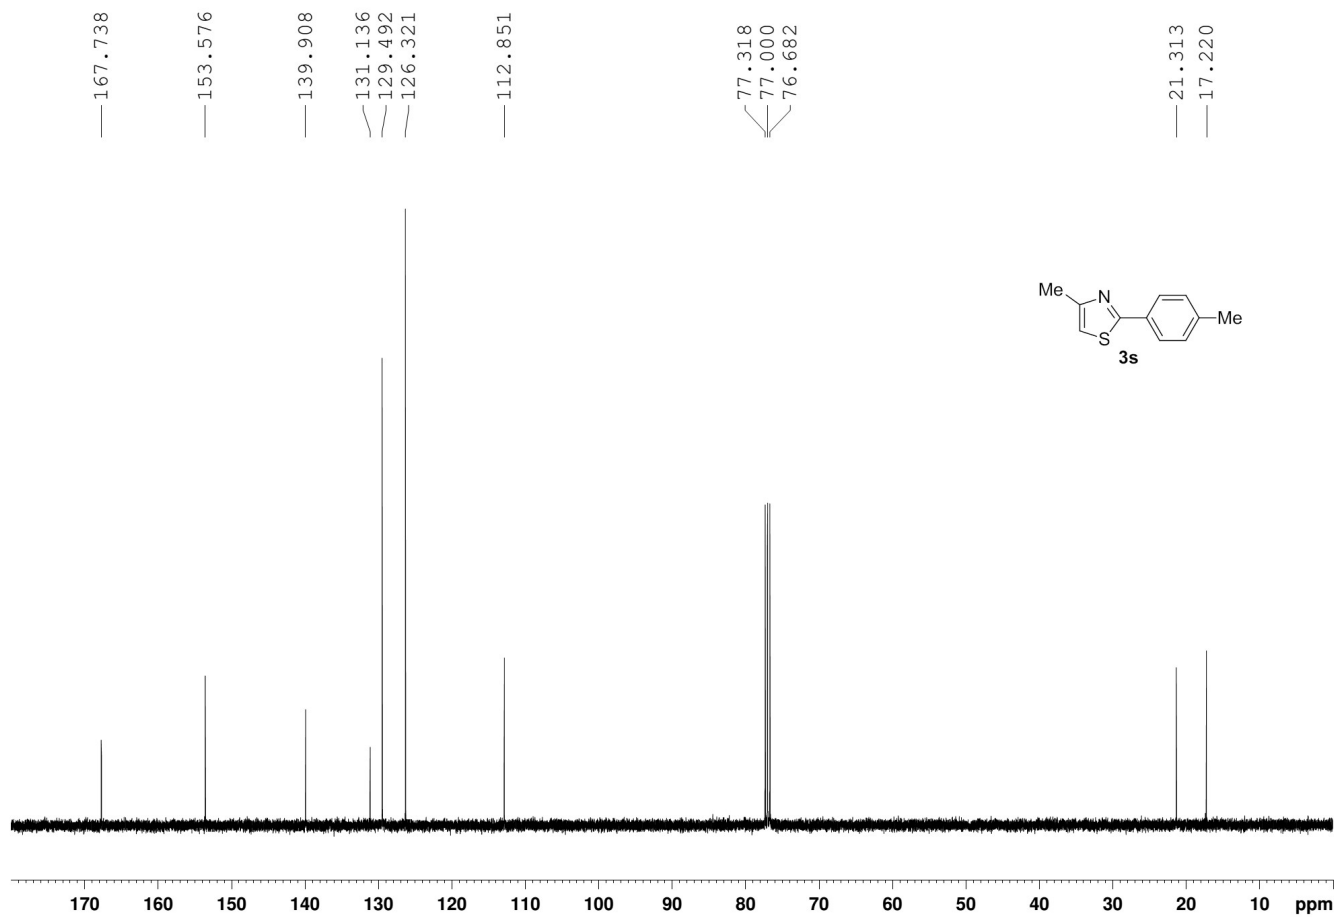



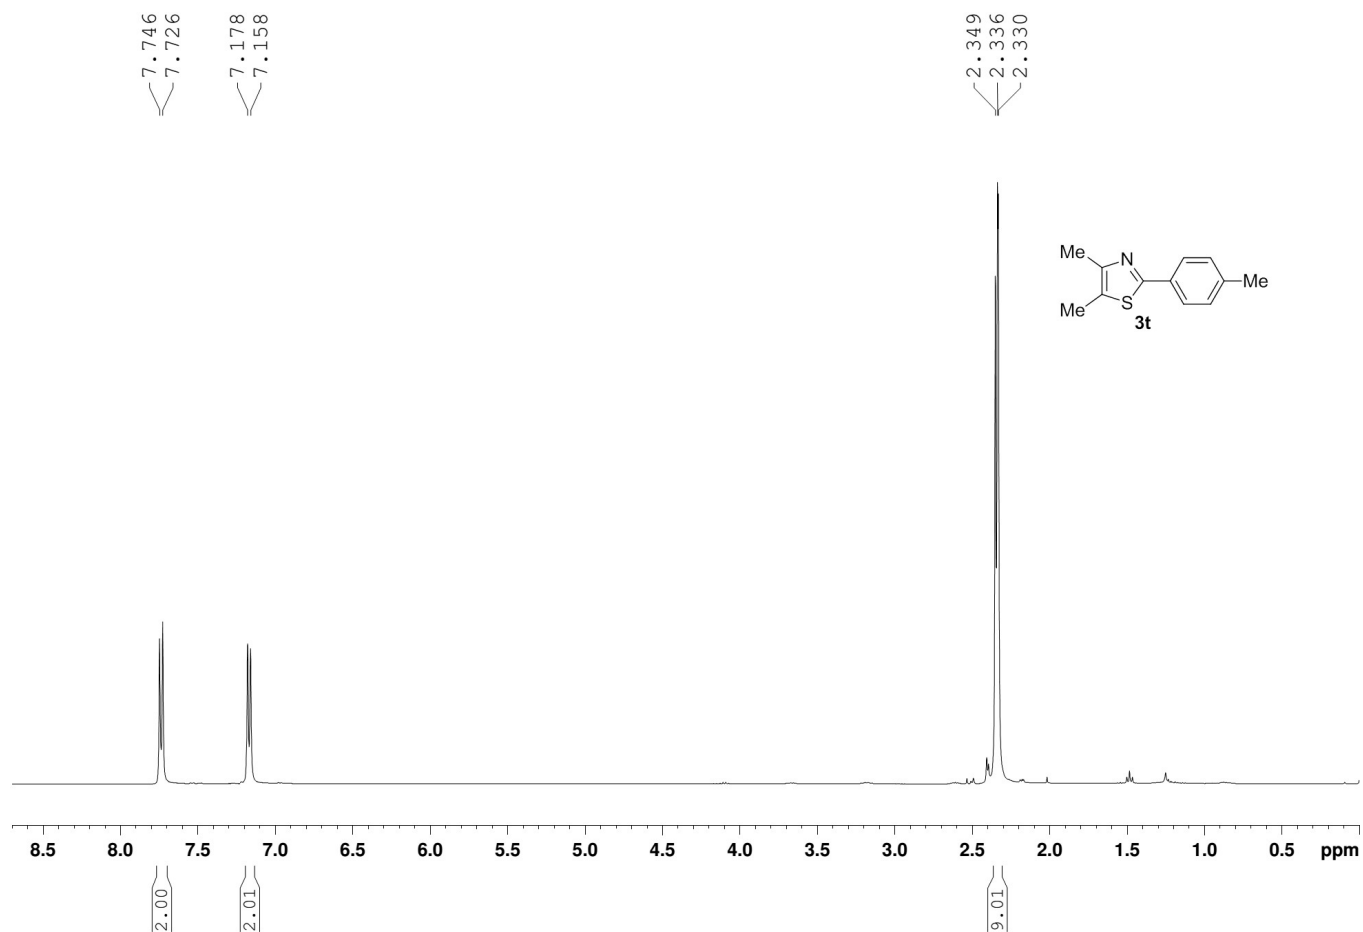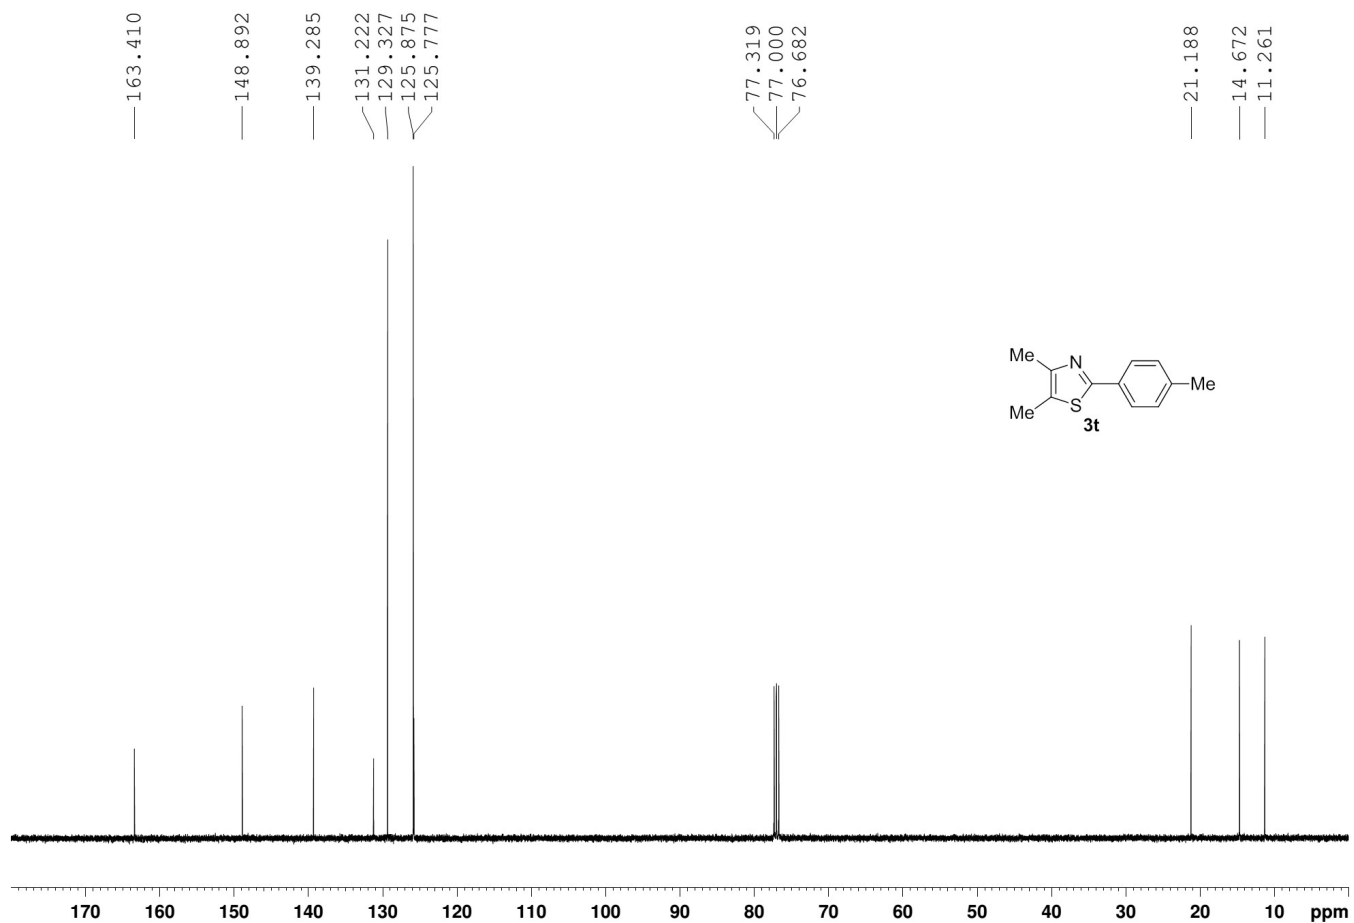

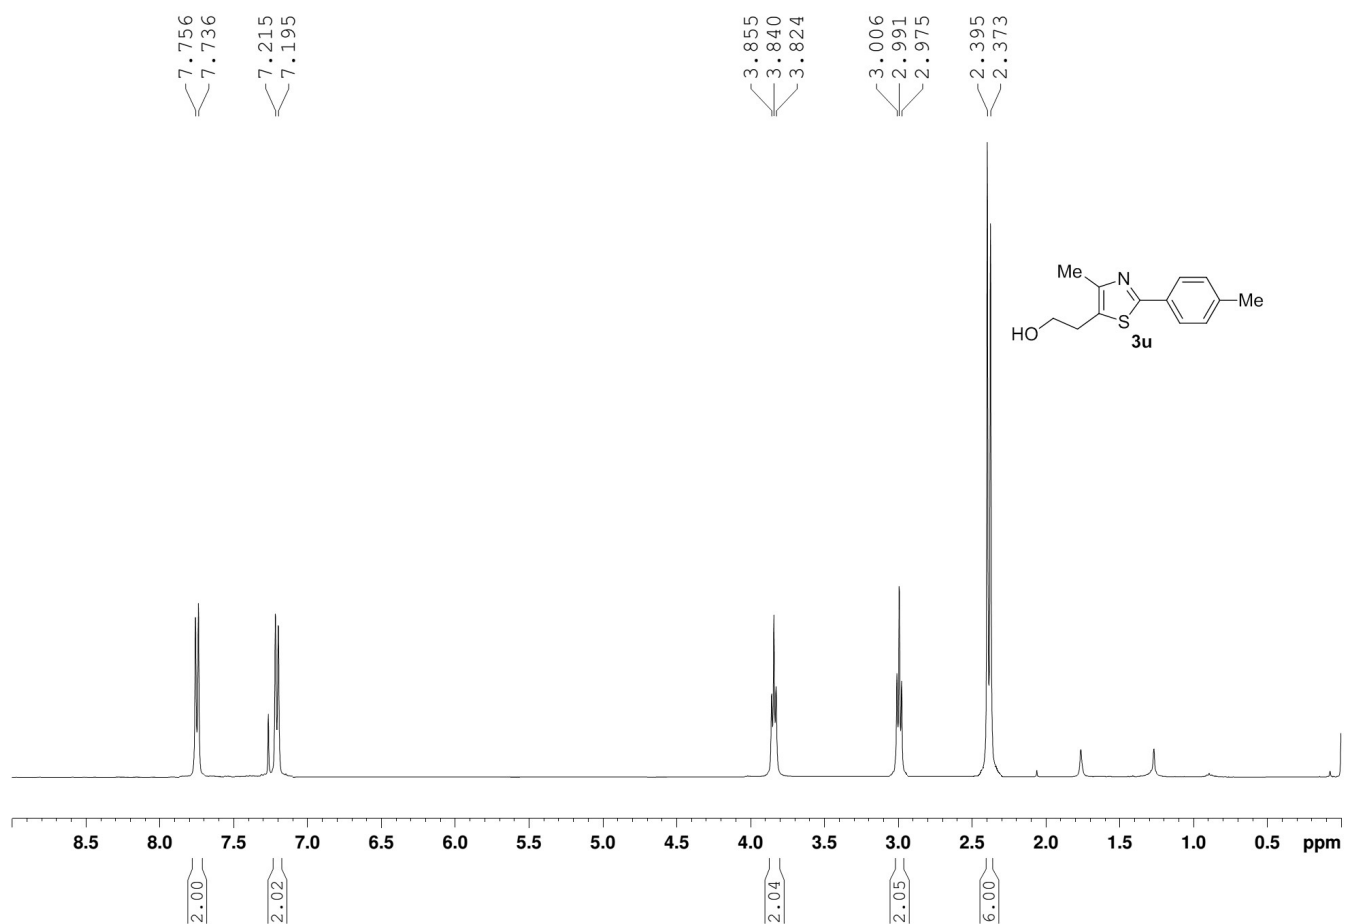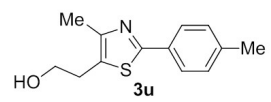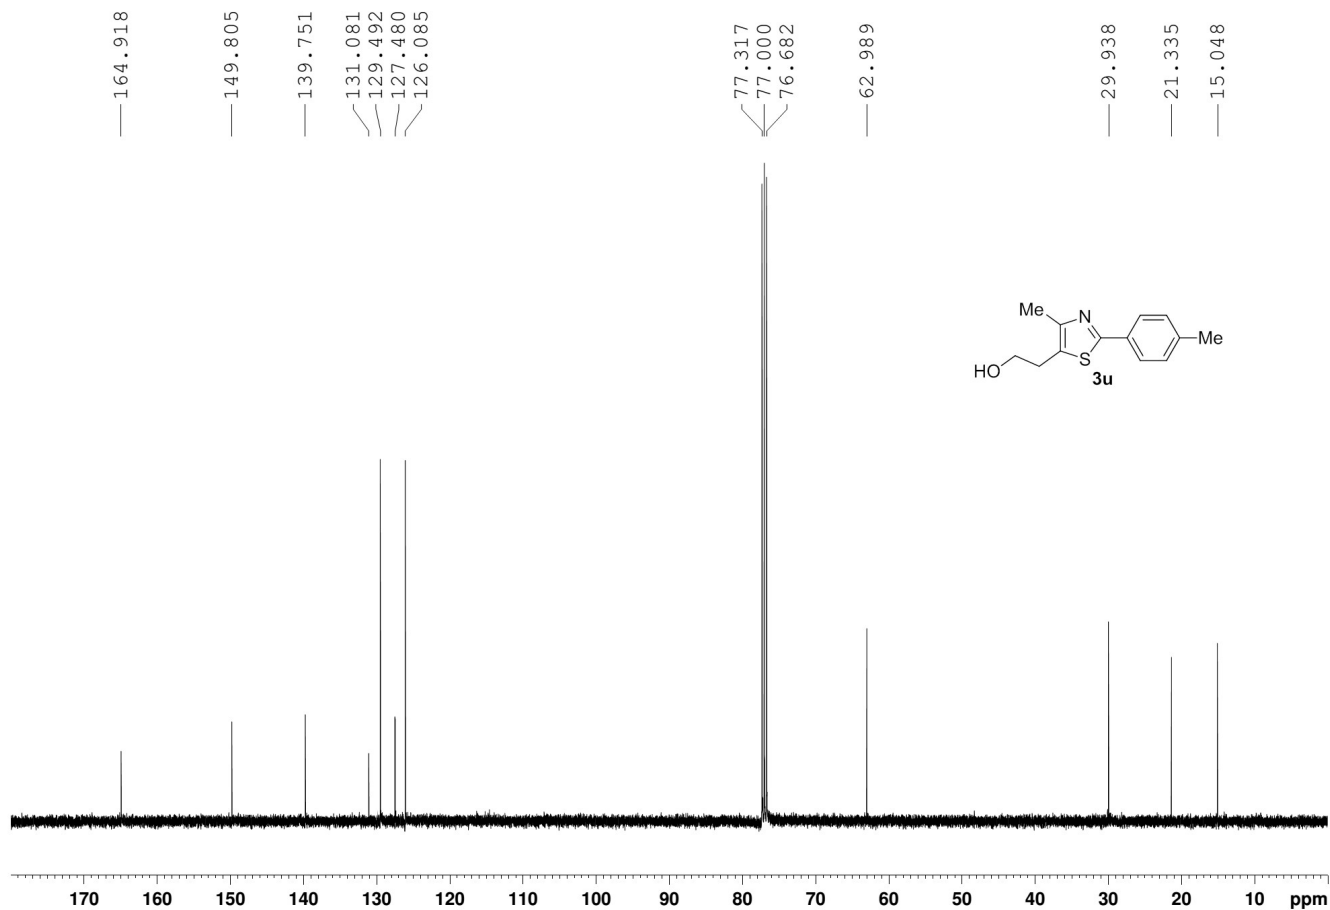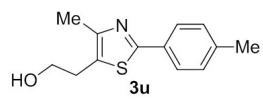

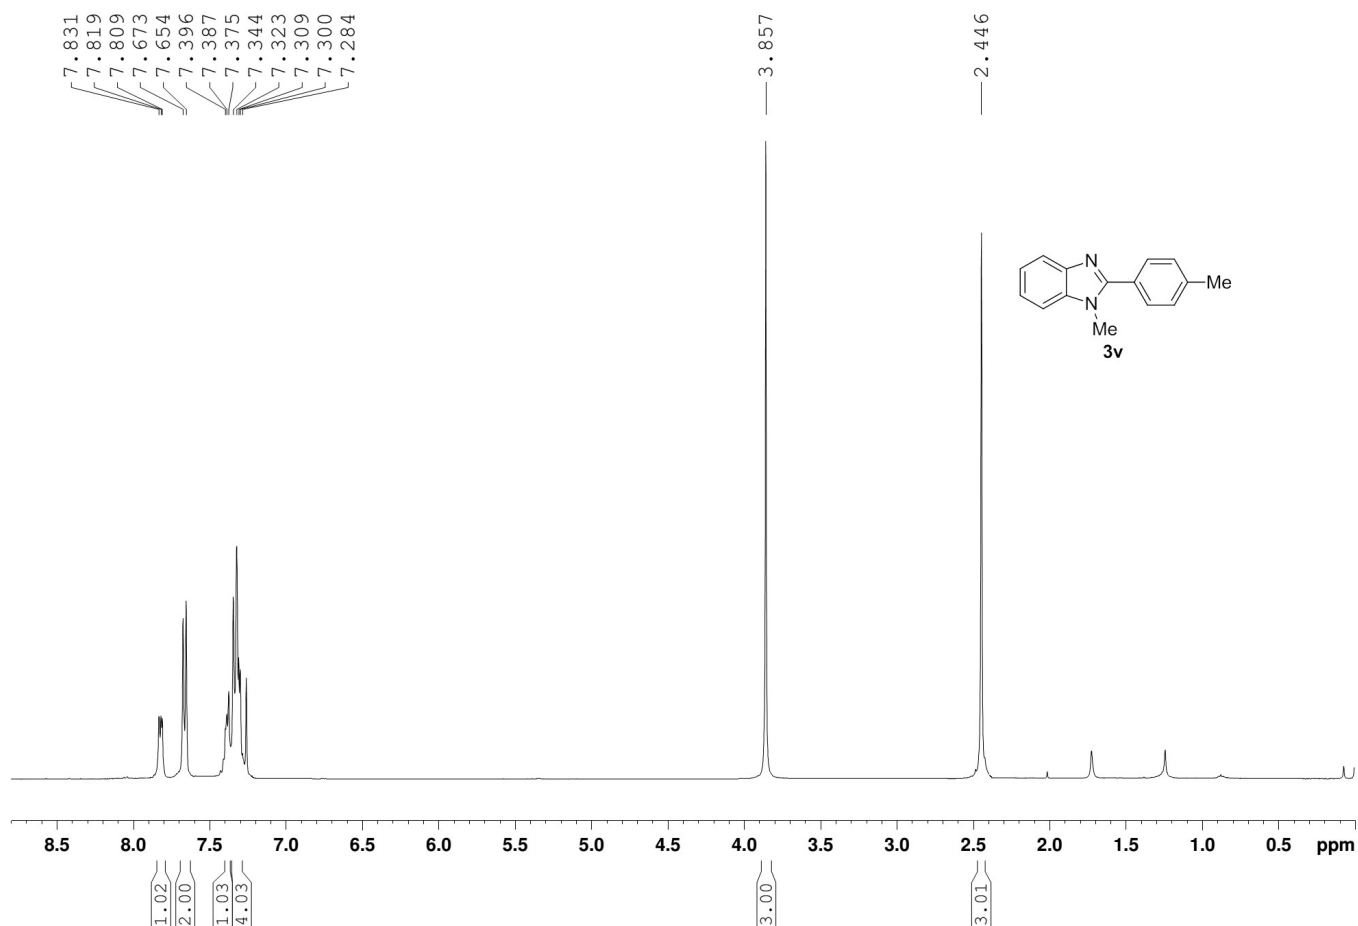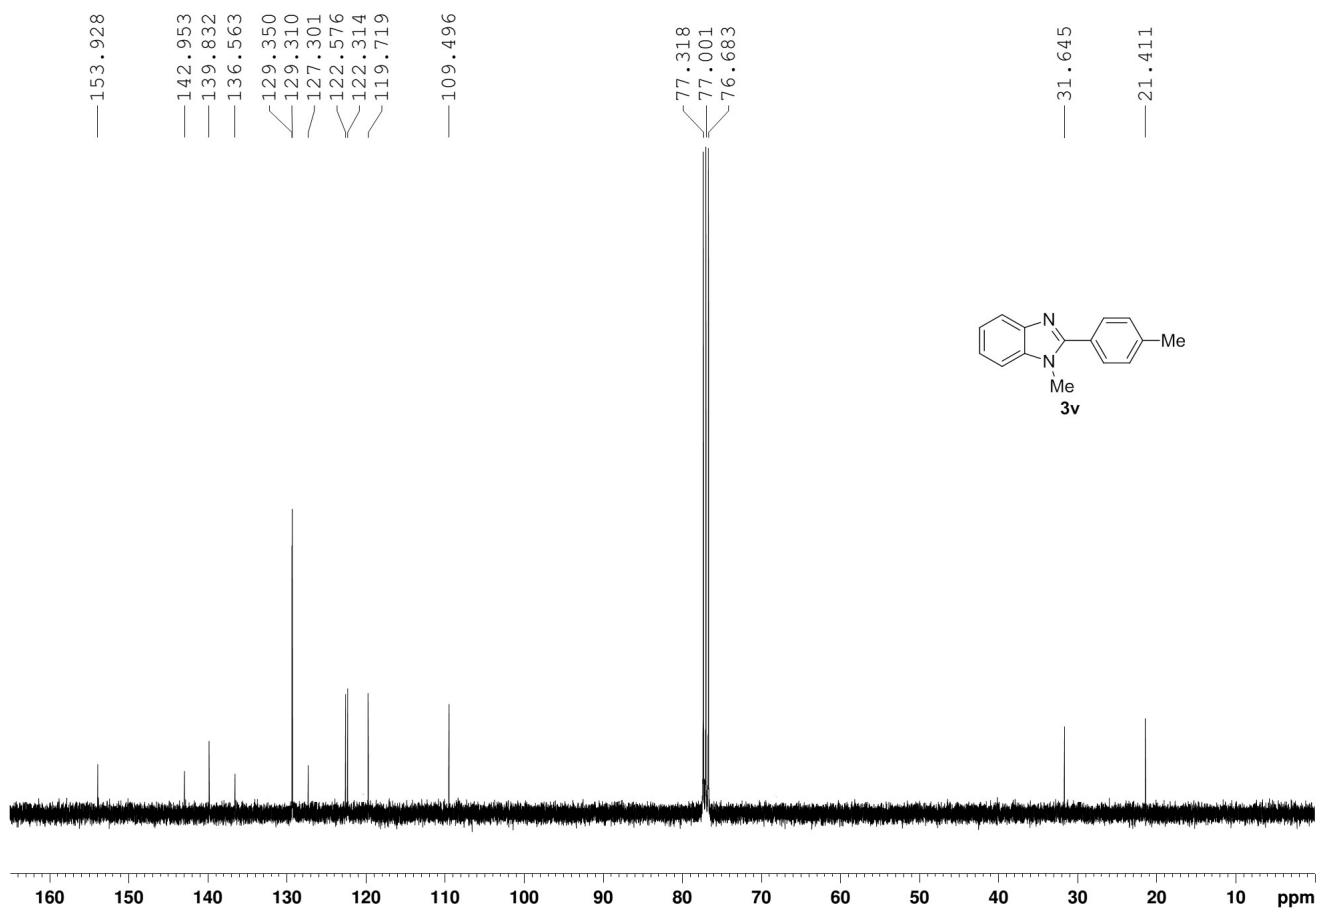

8.178  
8.169  
8.159  
8.159  
7.701  
7.692  
7.684  
7.678  
7.498  
7.491  
7.484  
7.475  
7.438  
7.433  
7.424  
7.269  
7.261  
7.255  
7.246

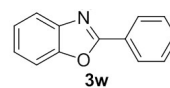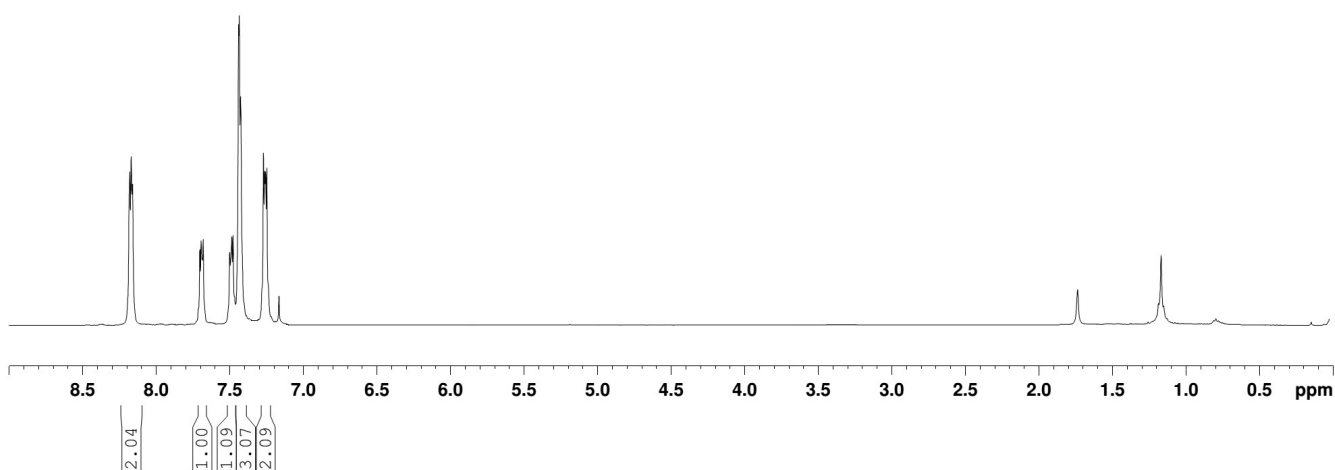

163.008  
150.751  
142.112  
131.456  
128.858  
127.595  
127.173  
125.054  
124.528  
119.994  
110.540

77.317  
77.000  
76.682

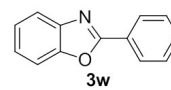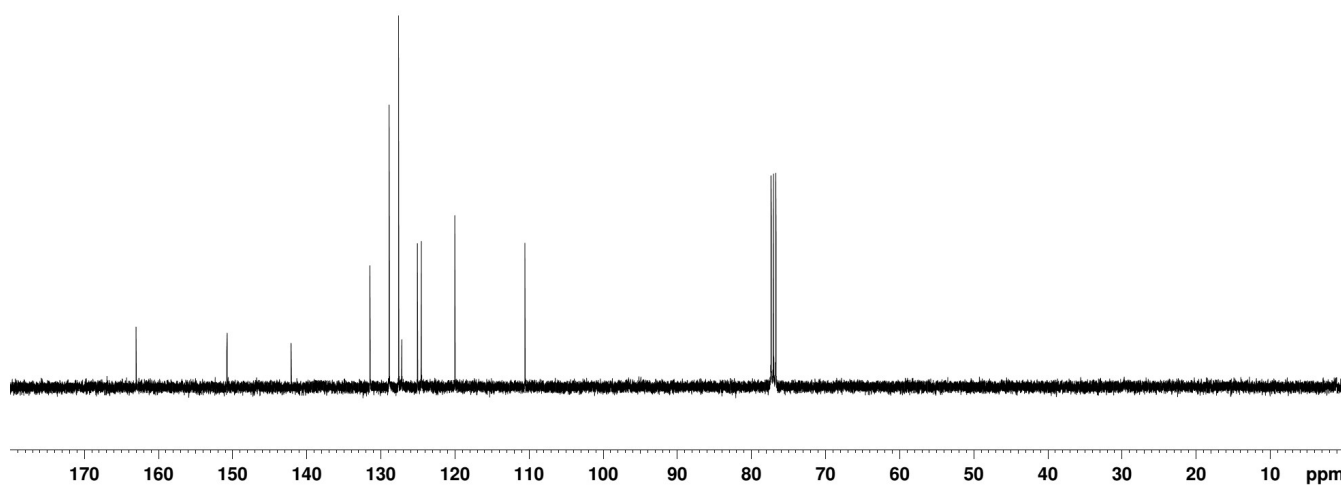

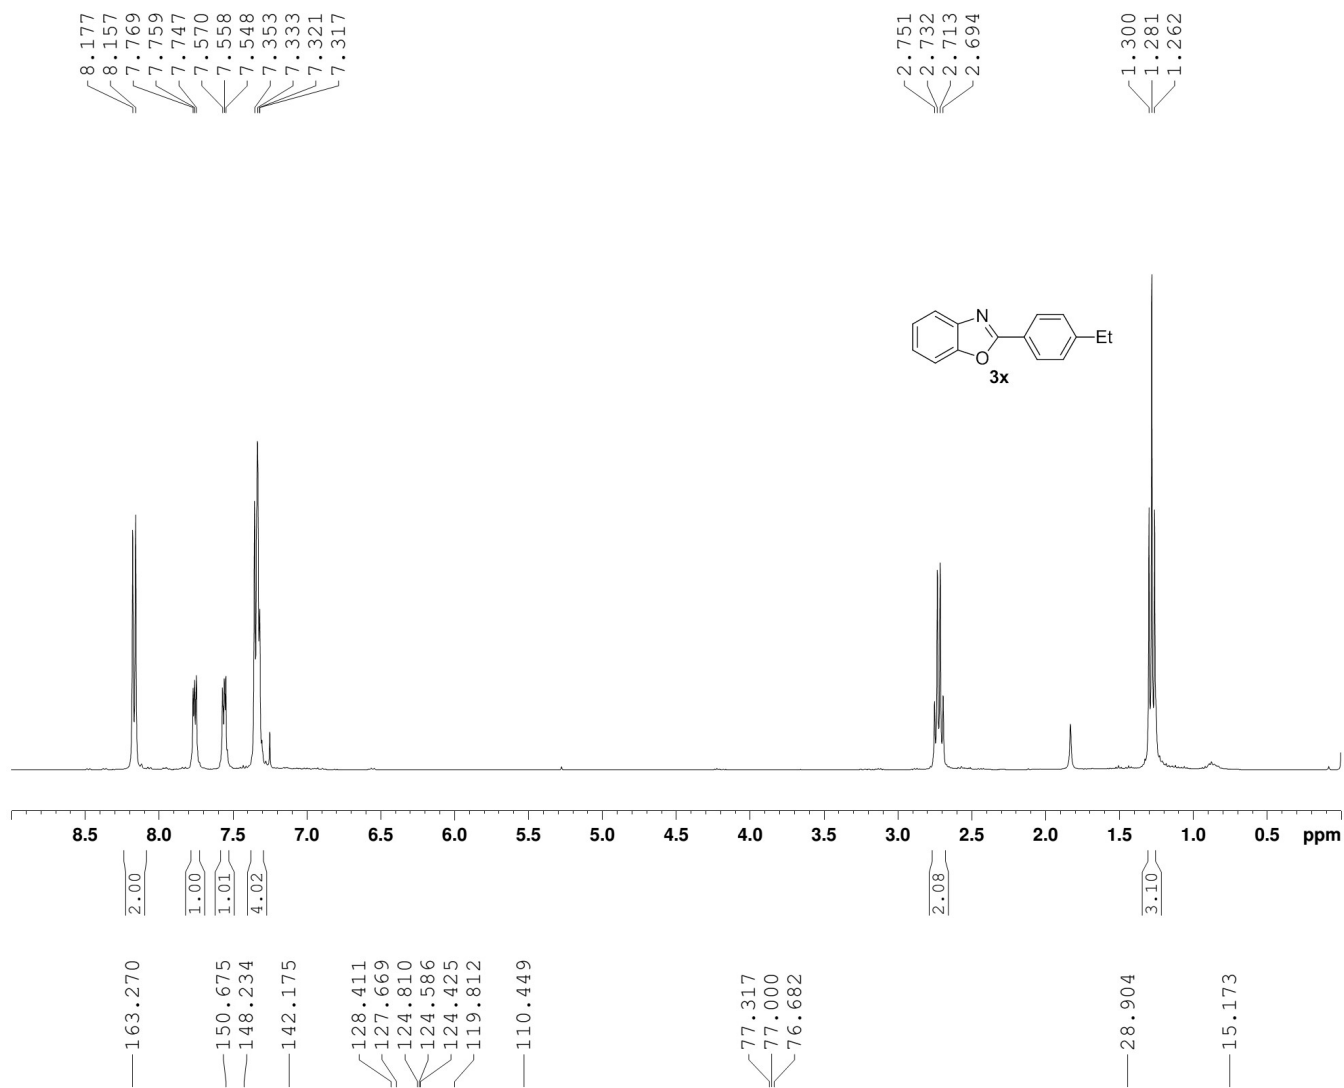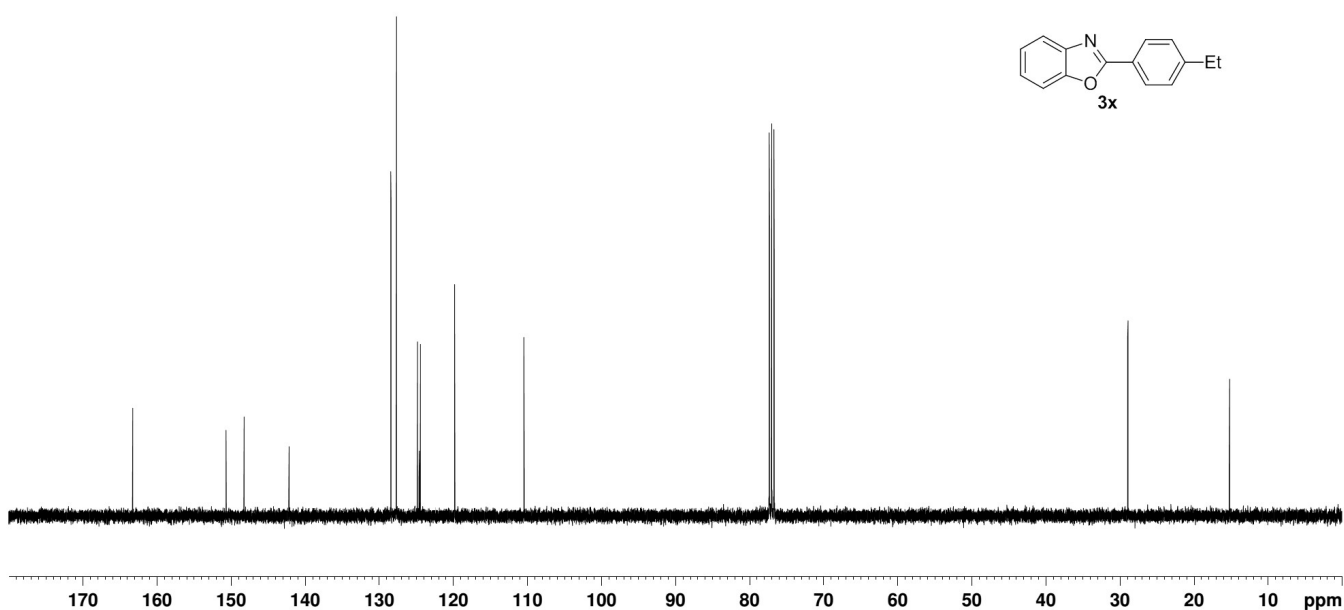

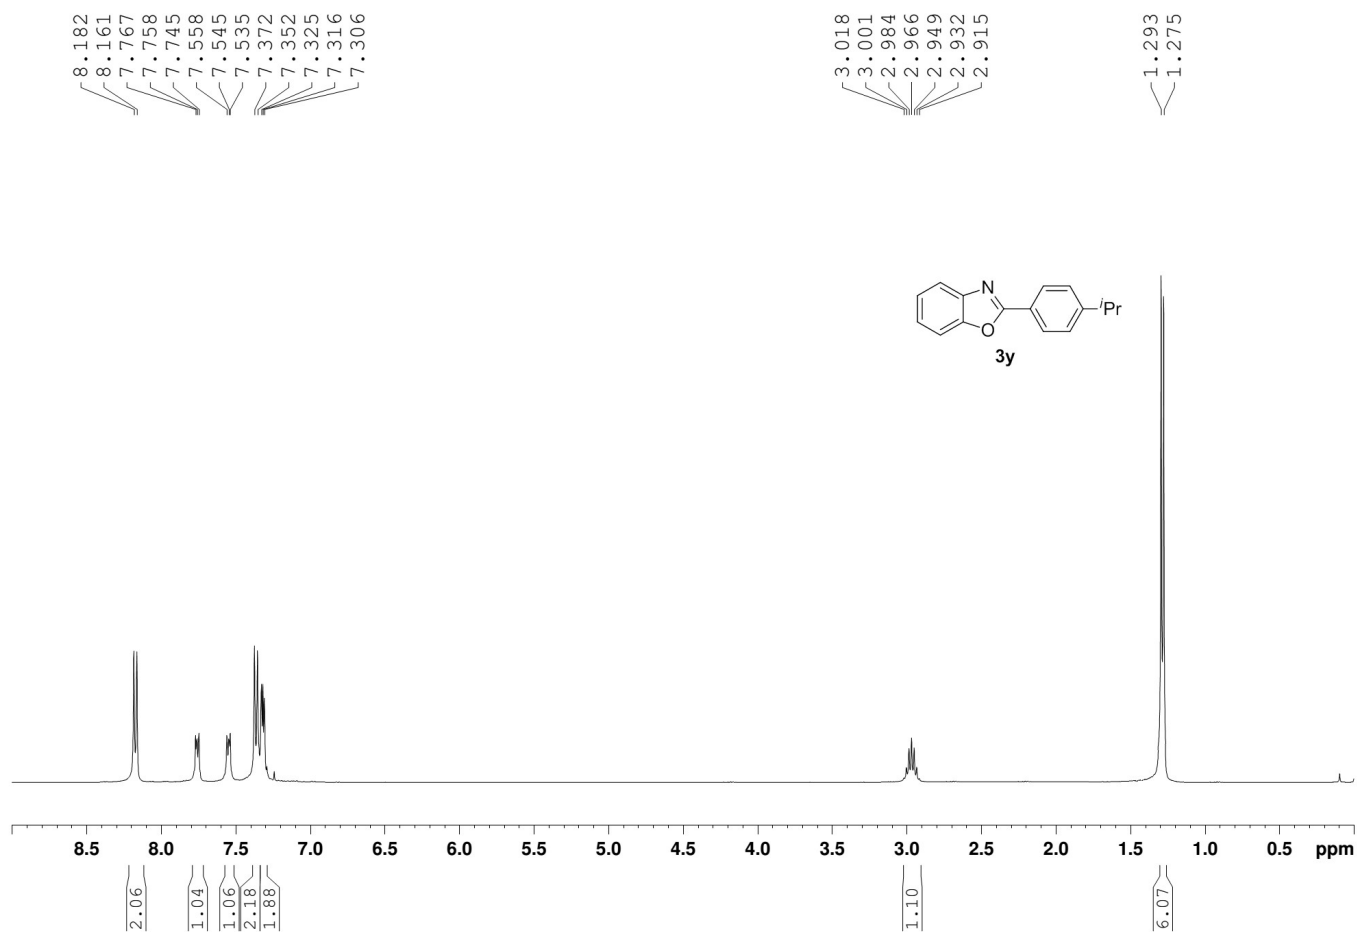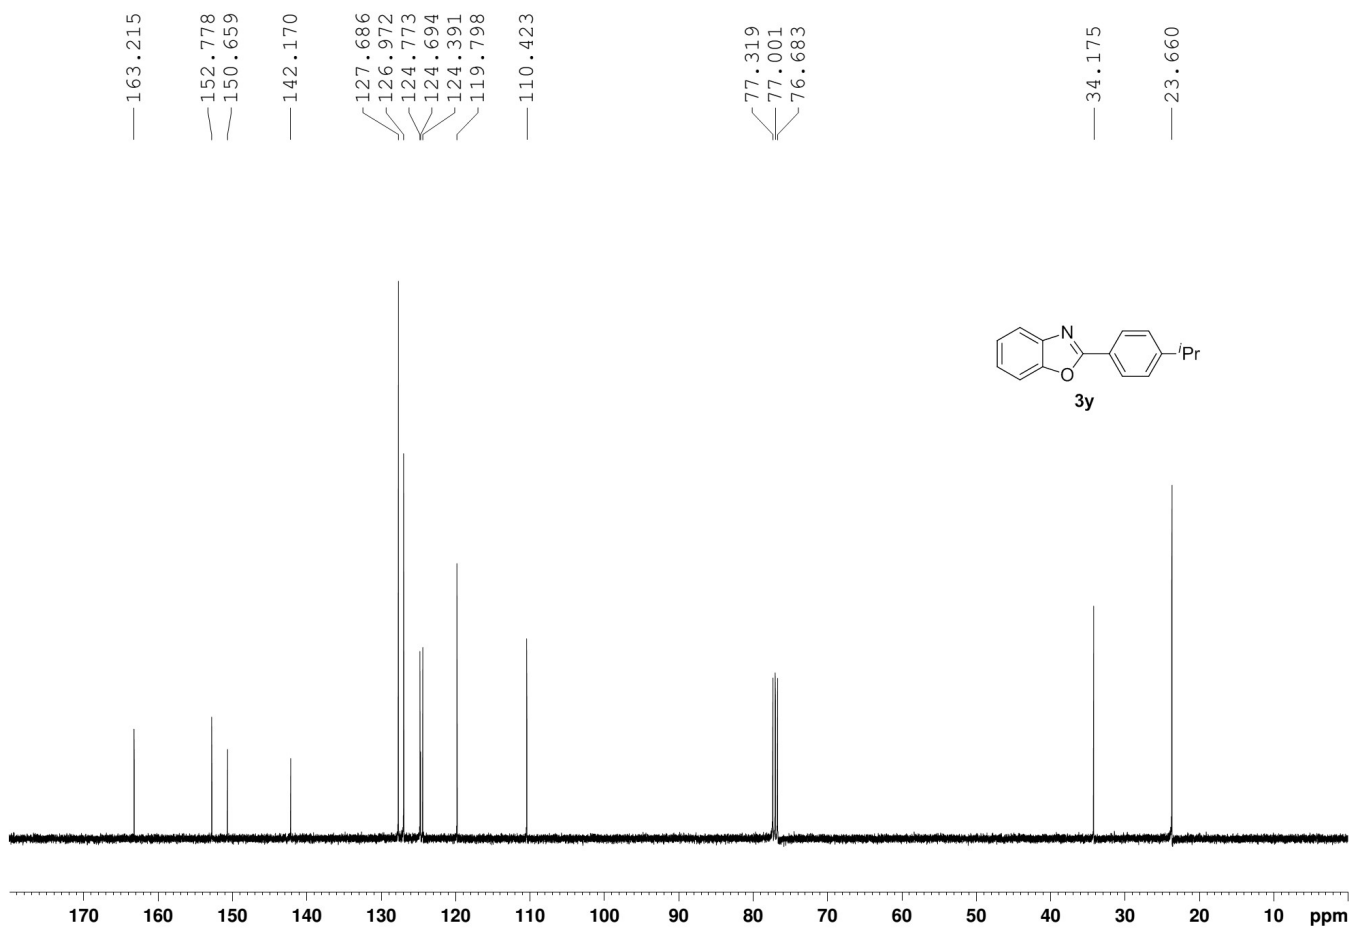

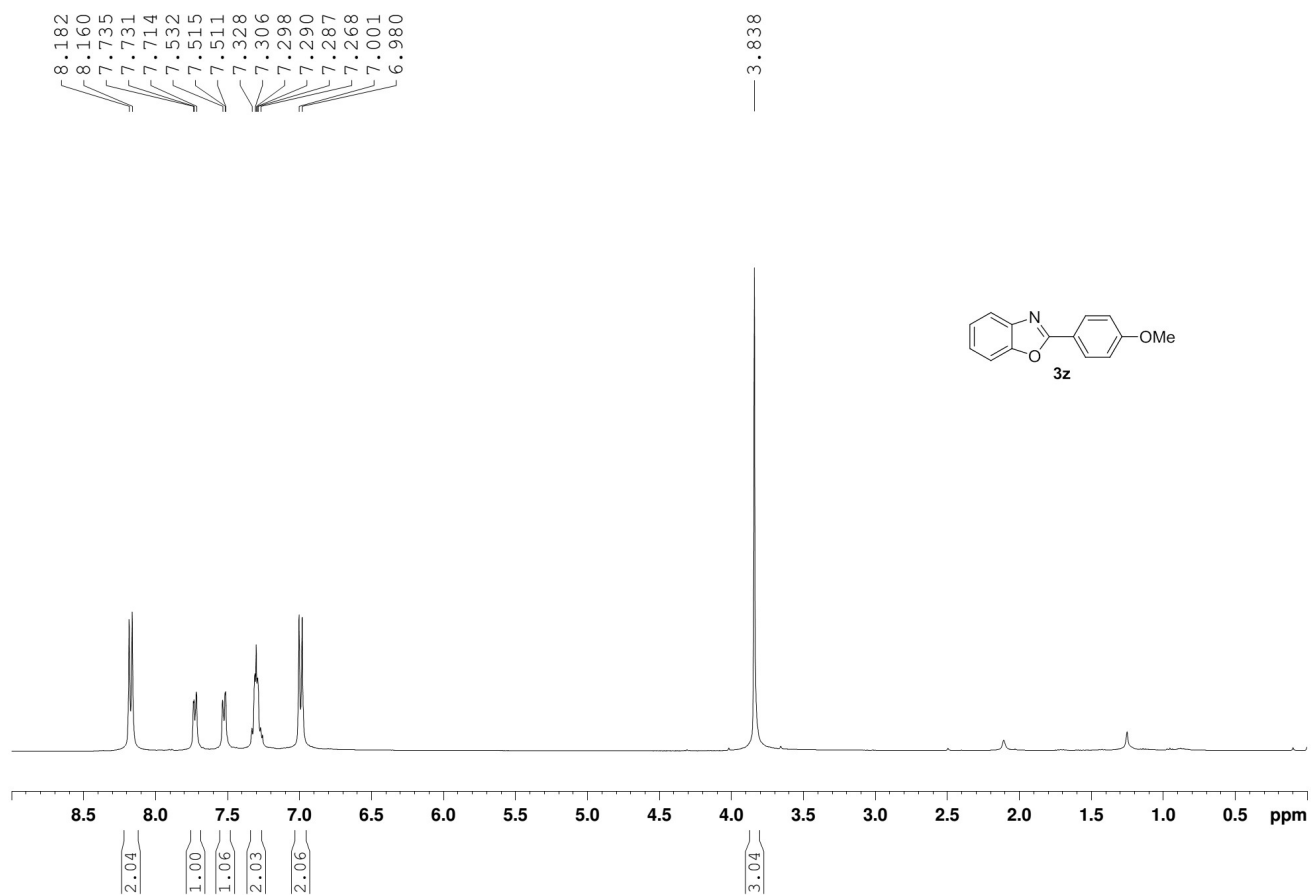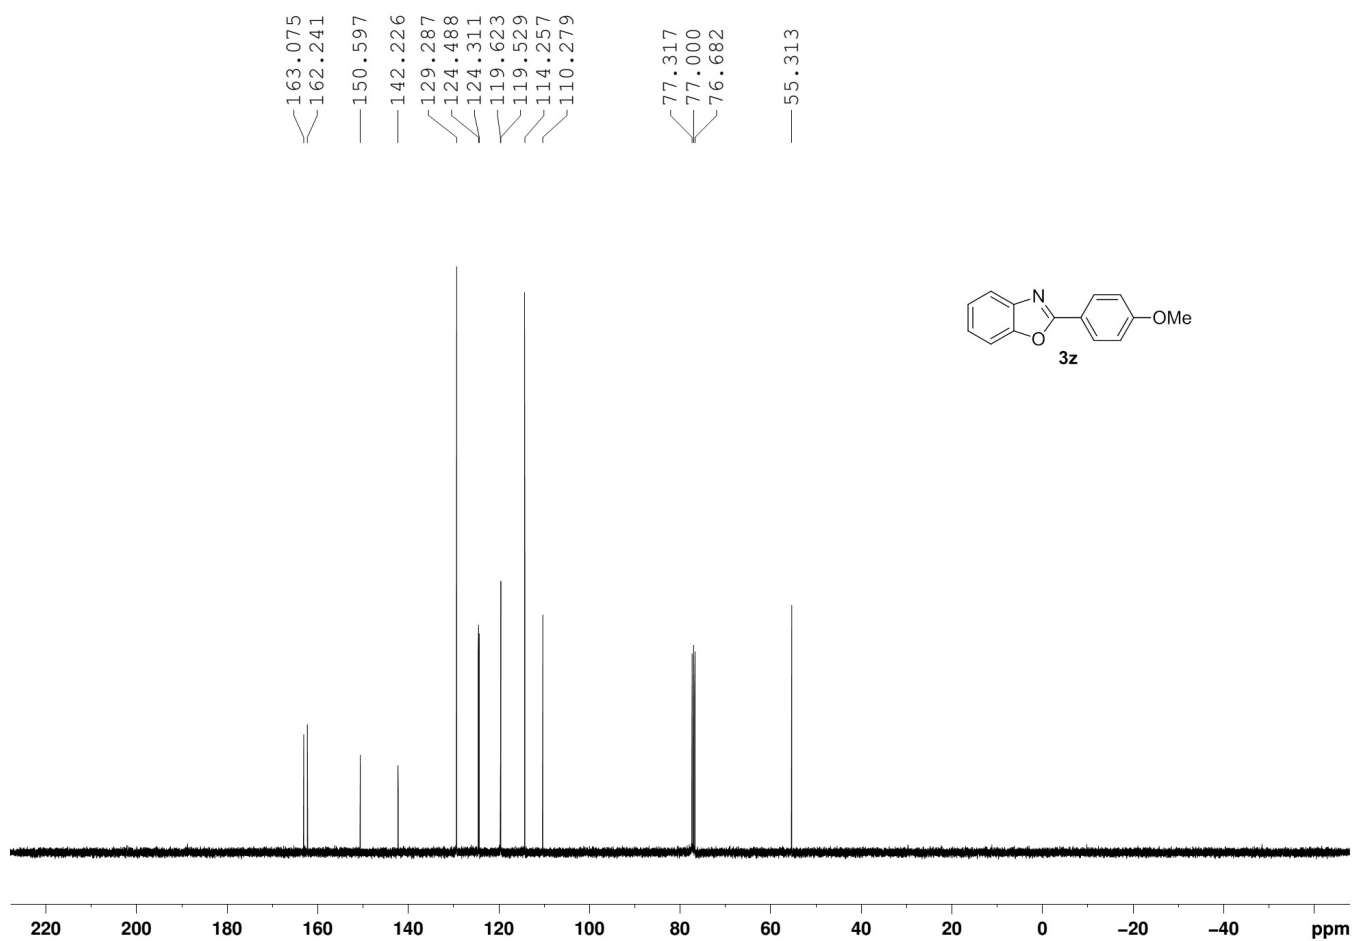

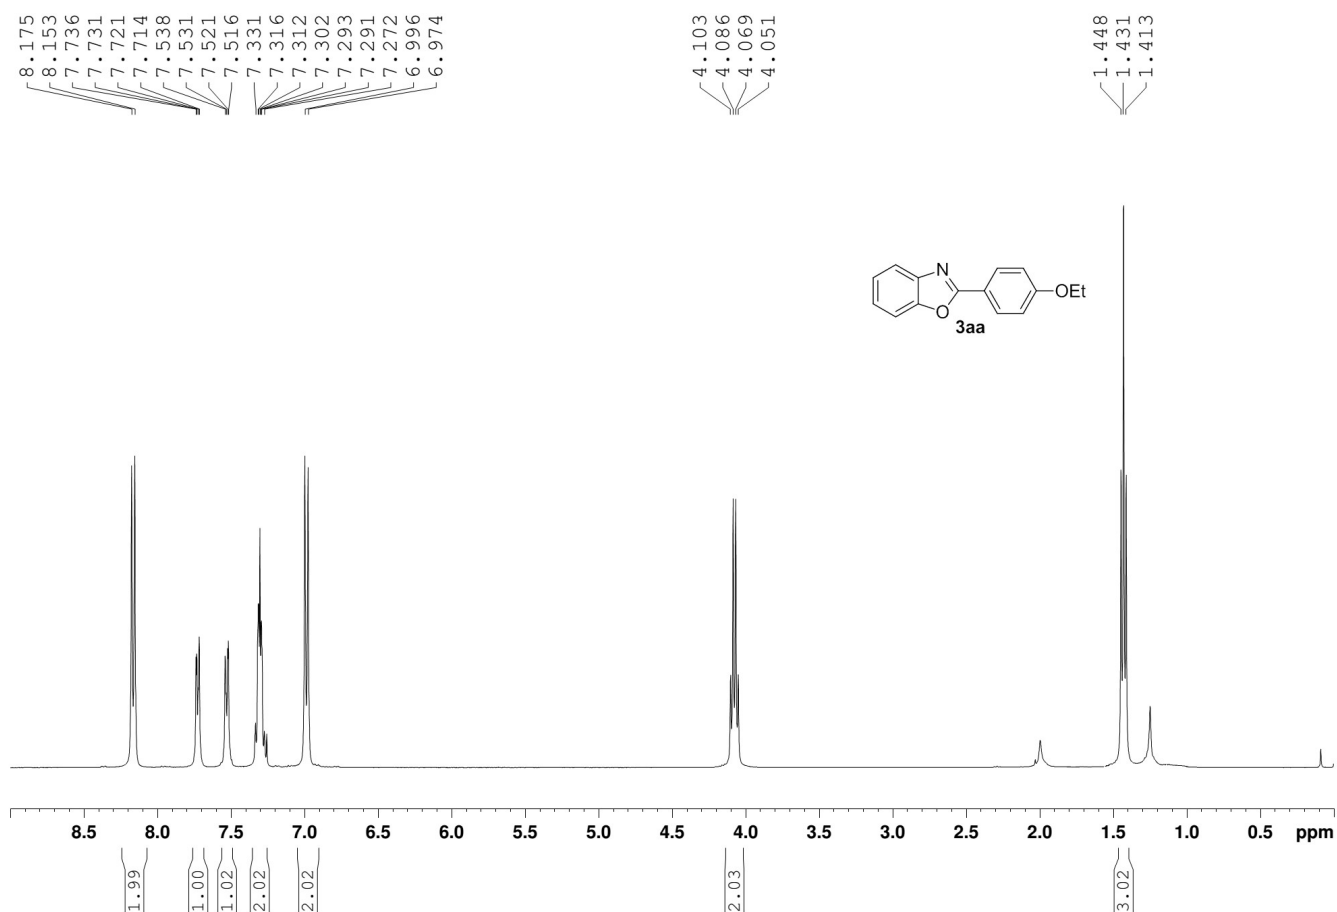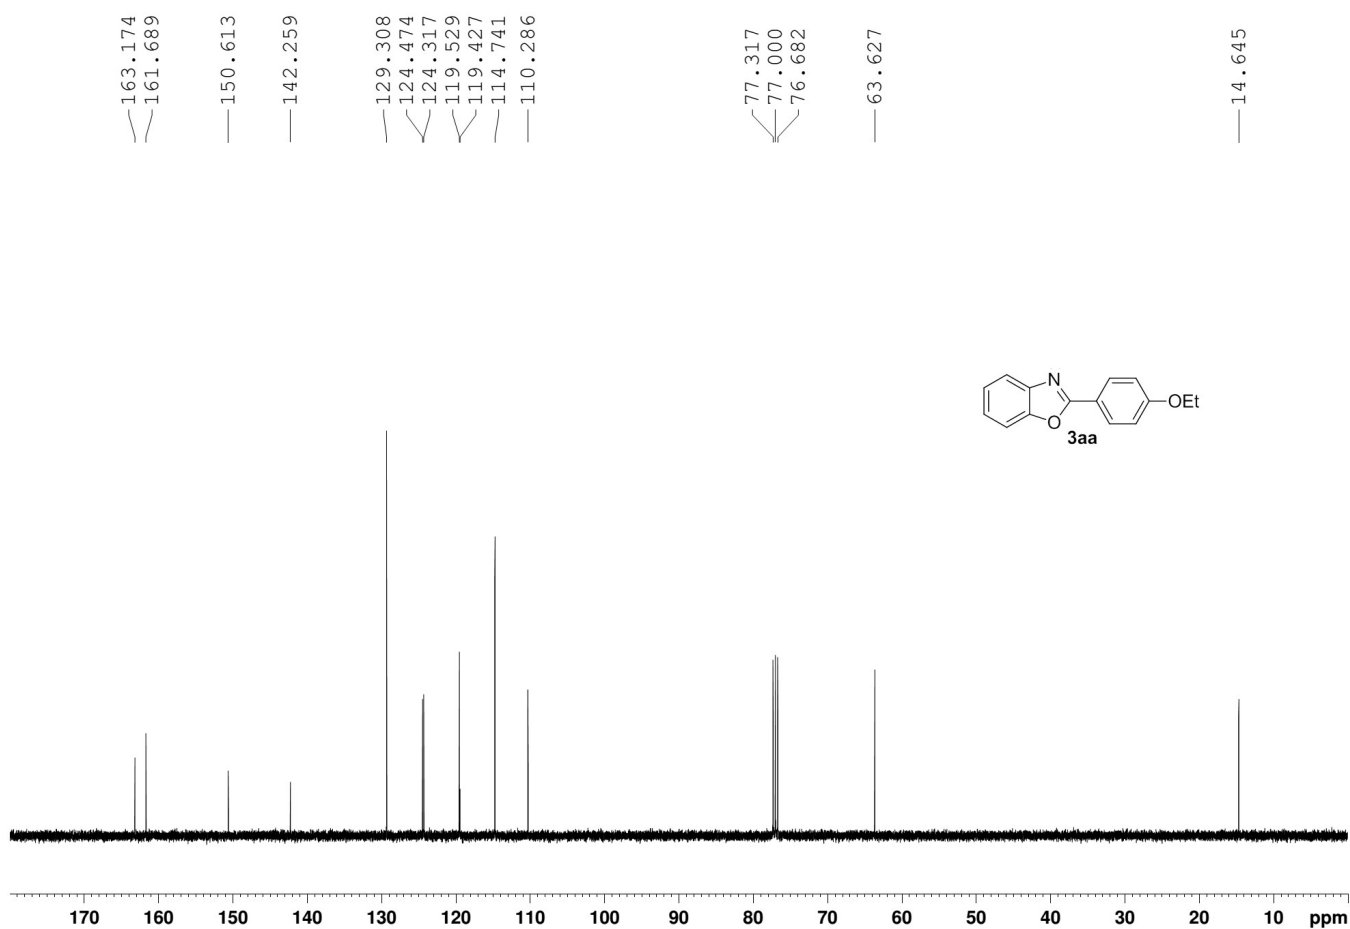



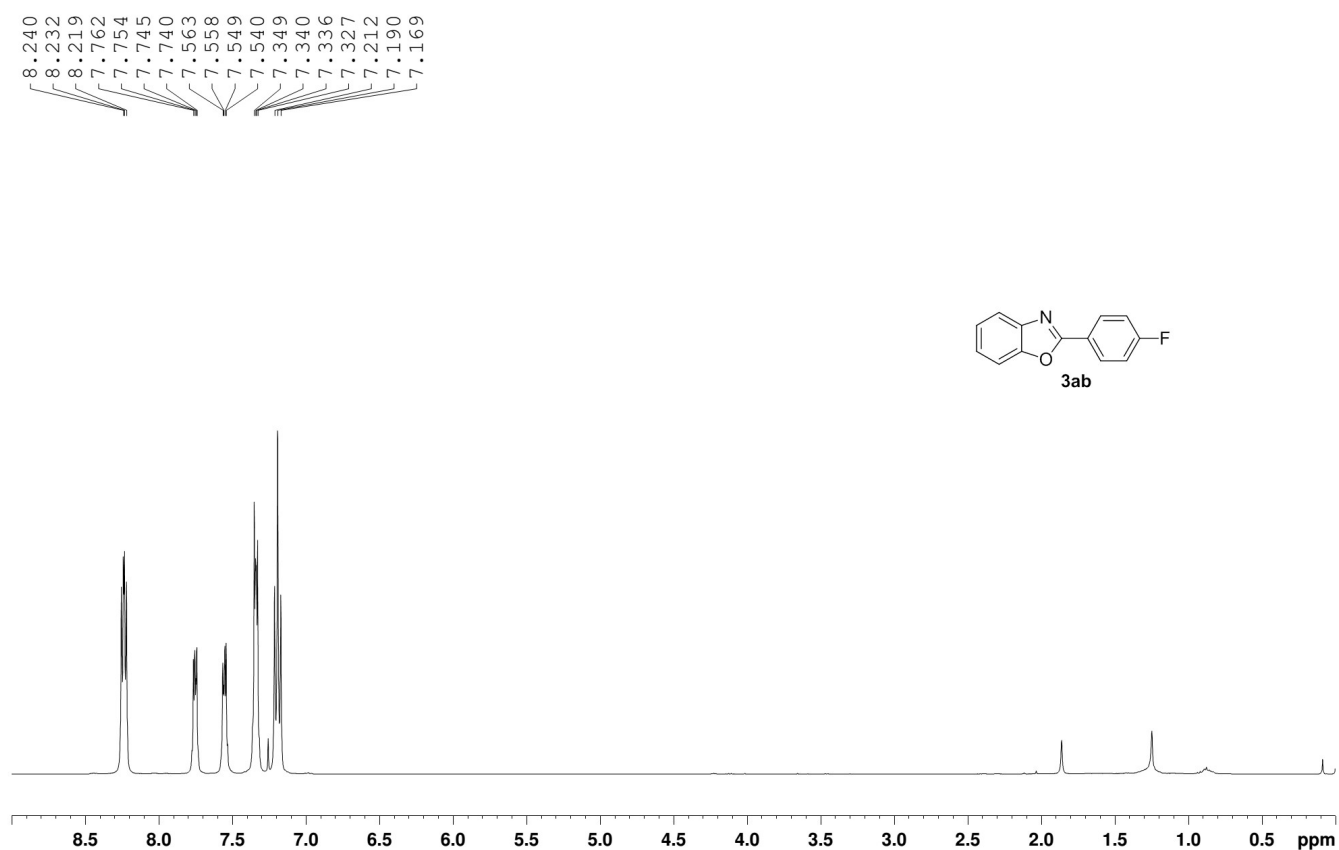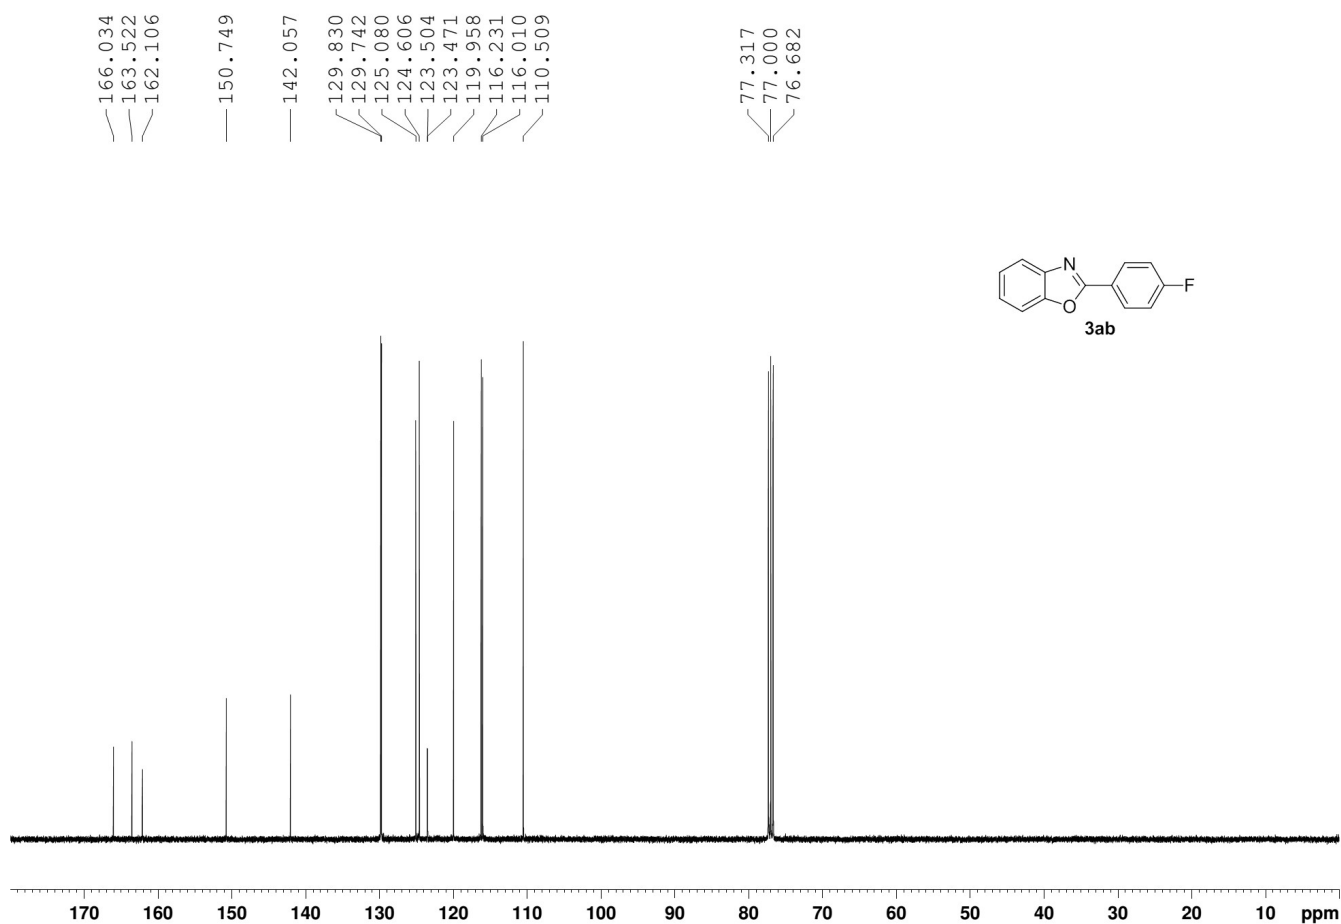

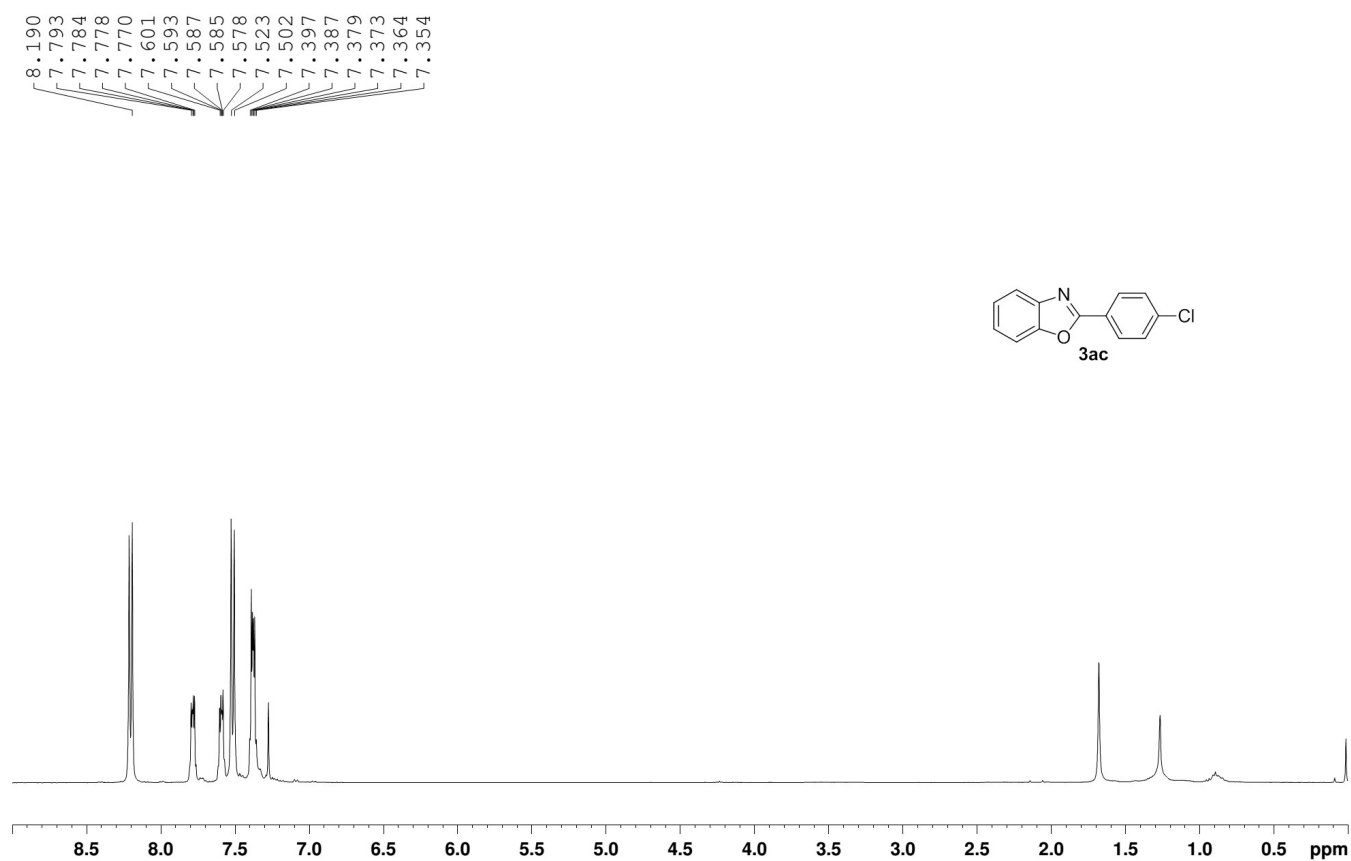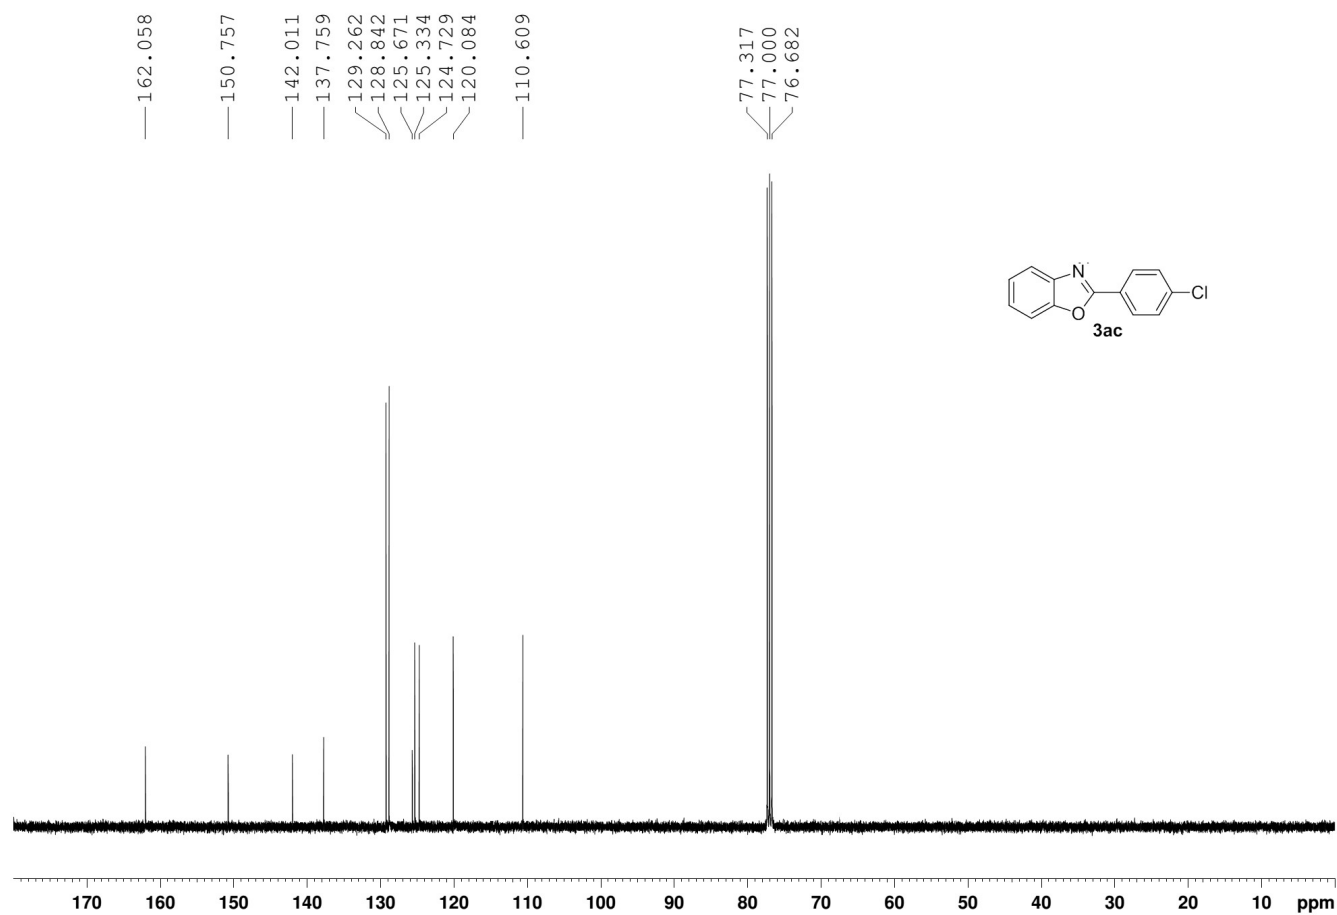

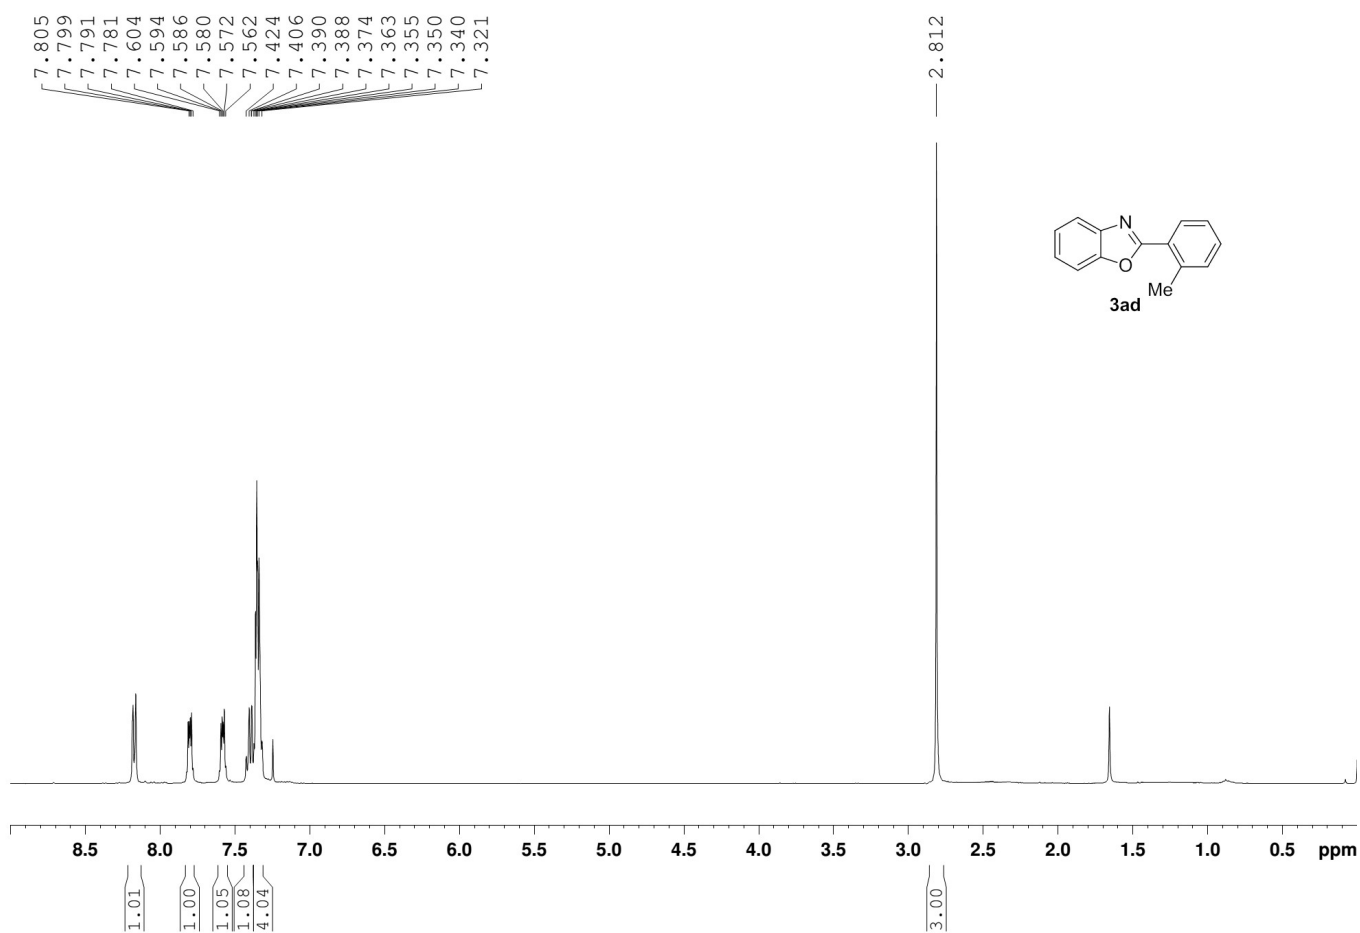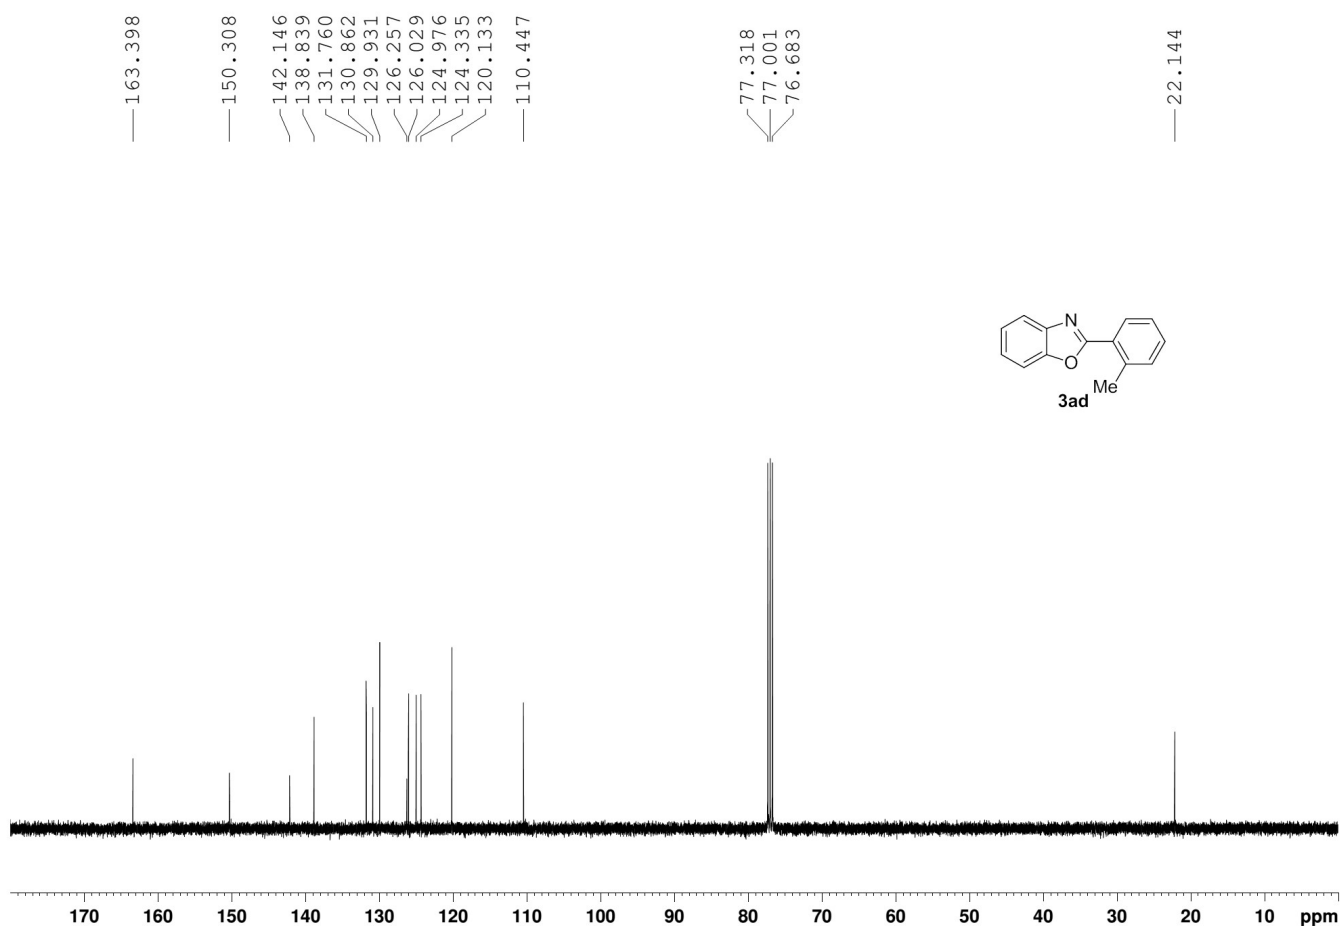

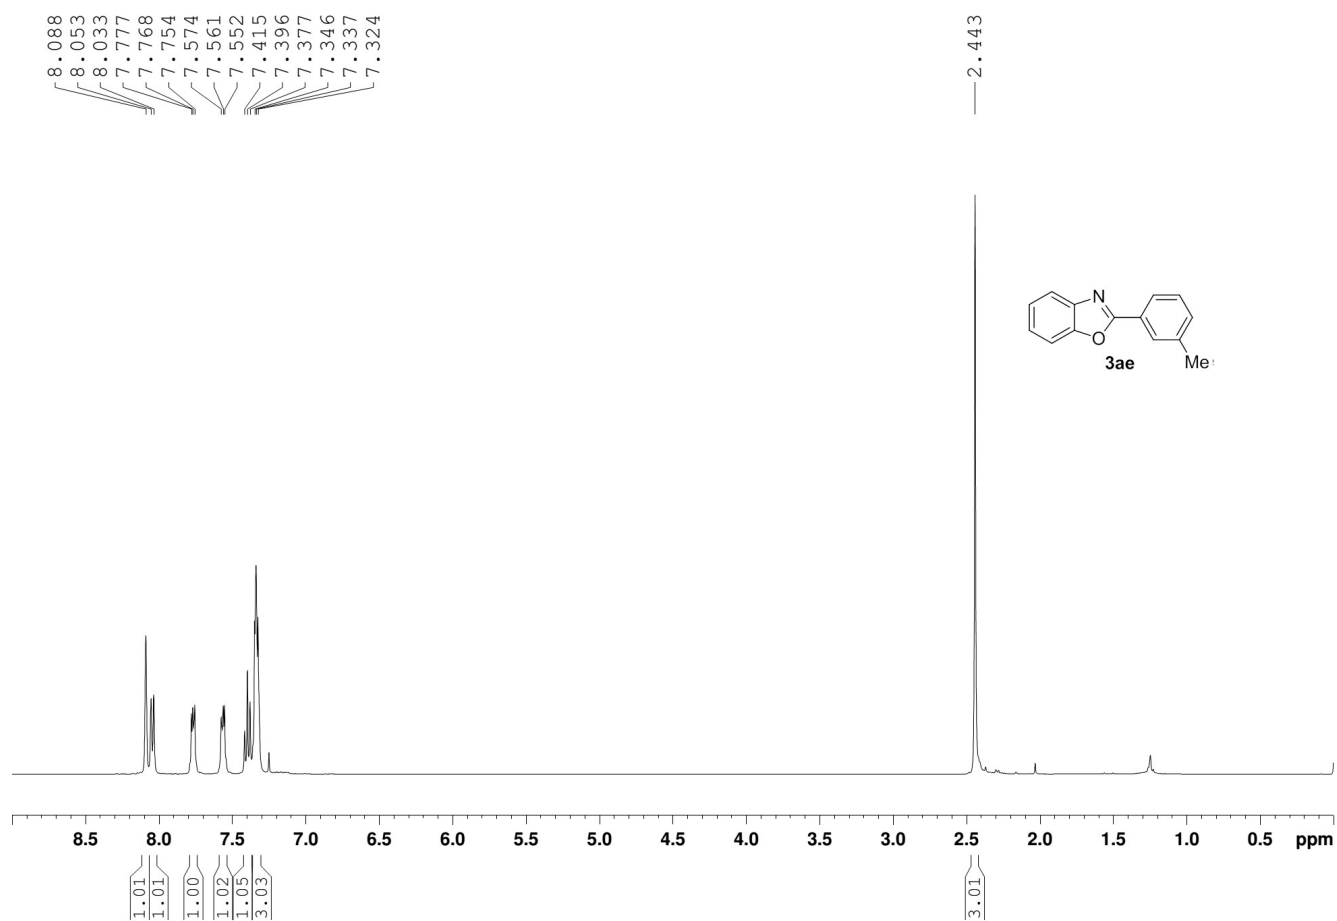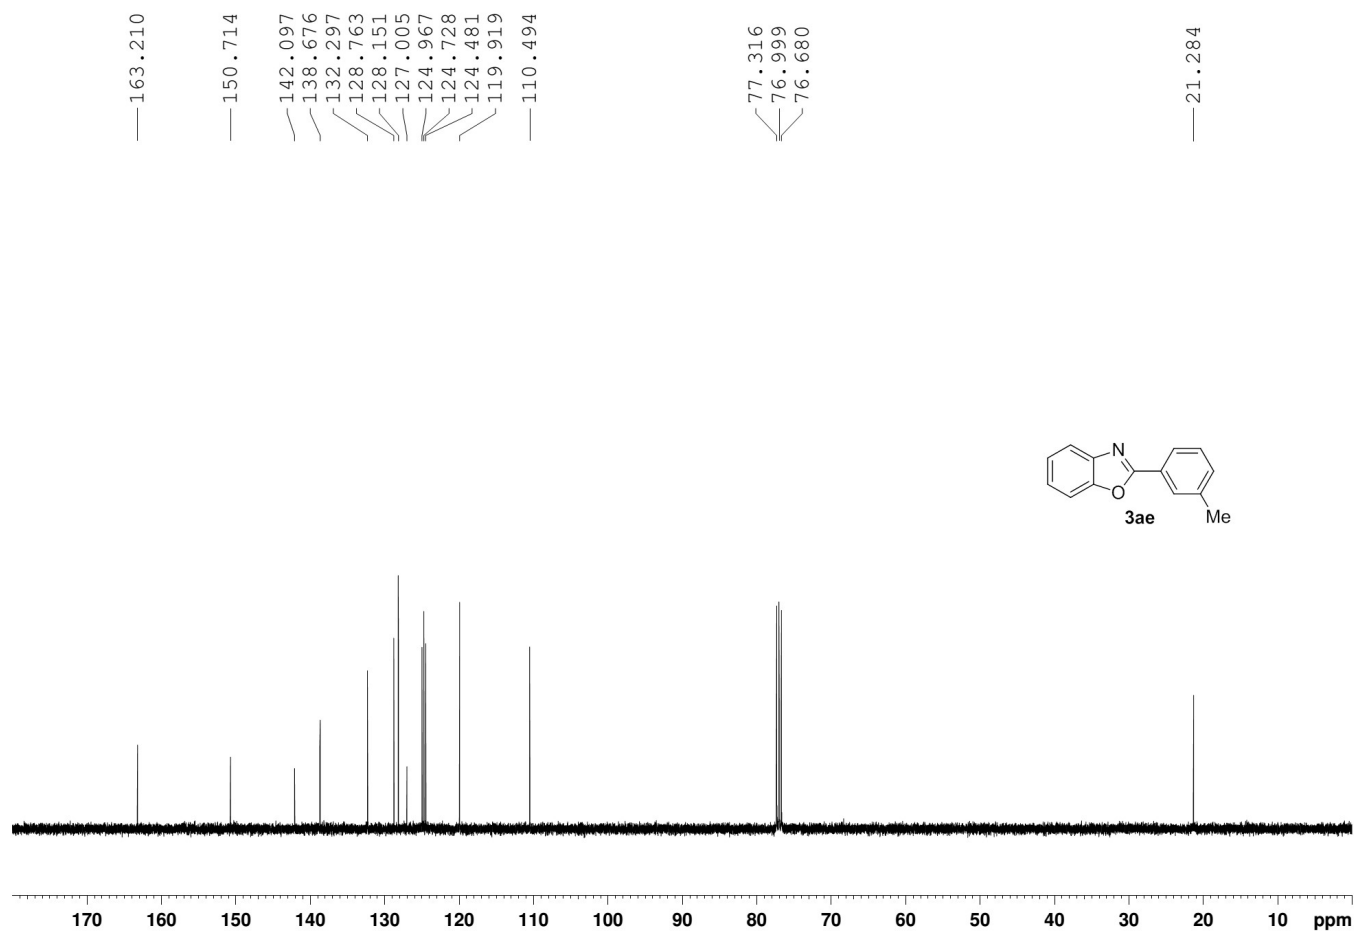

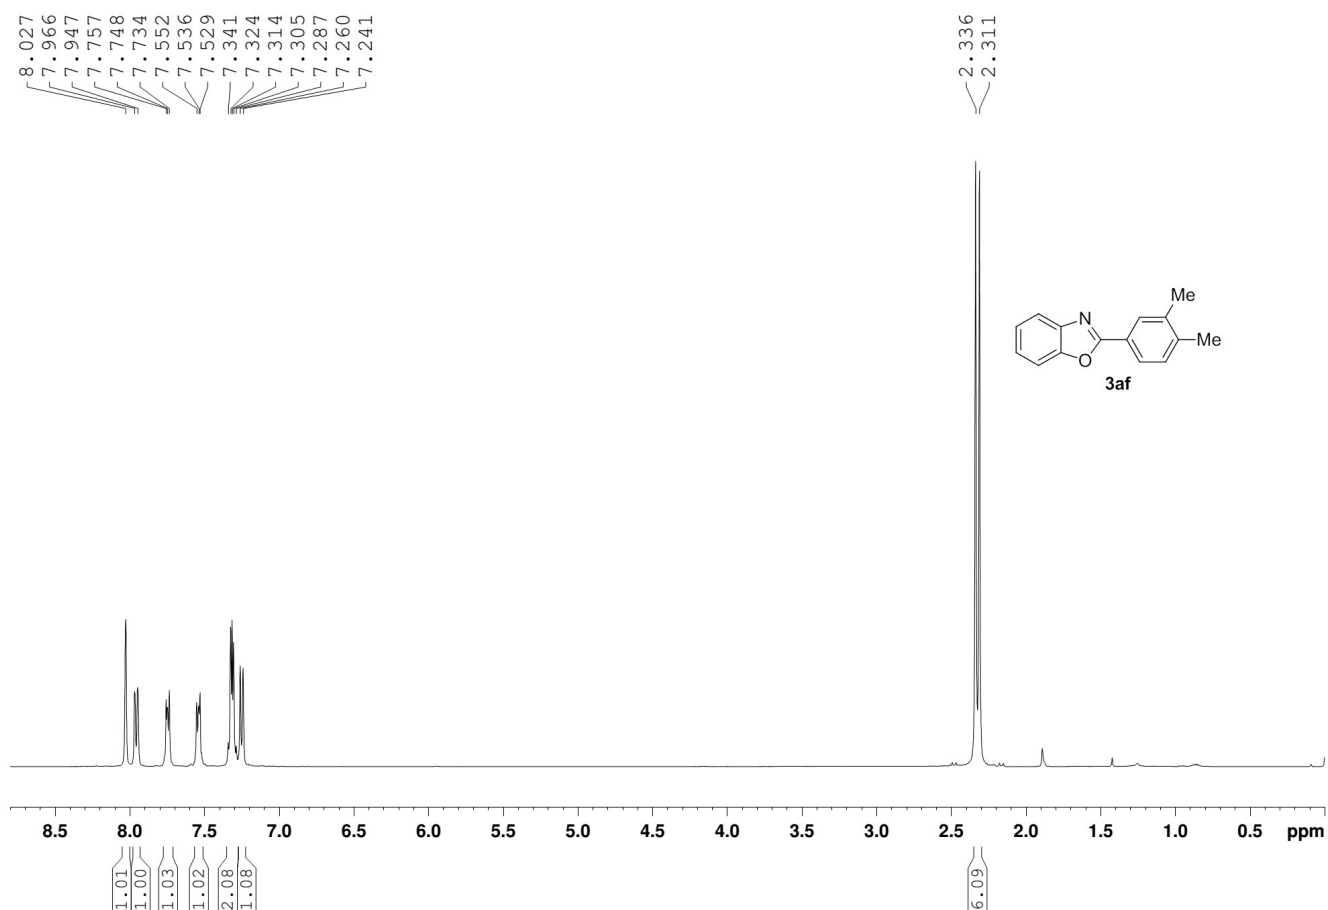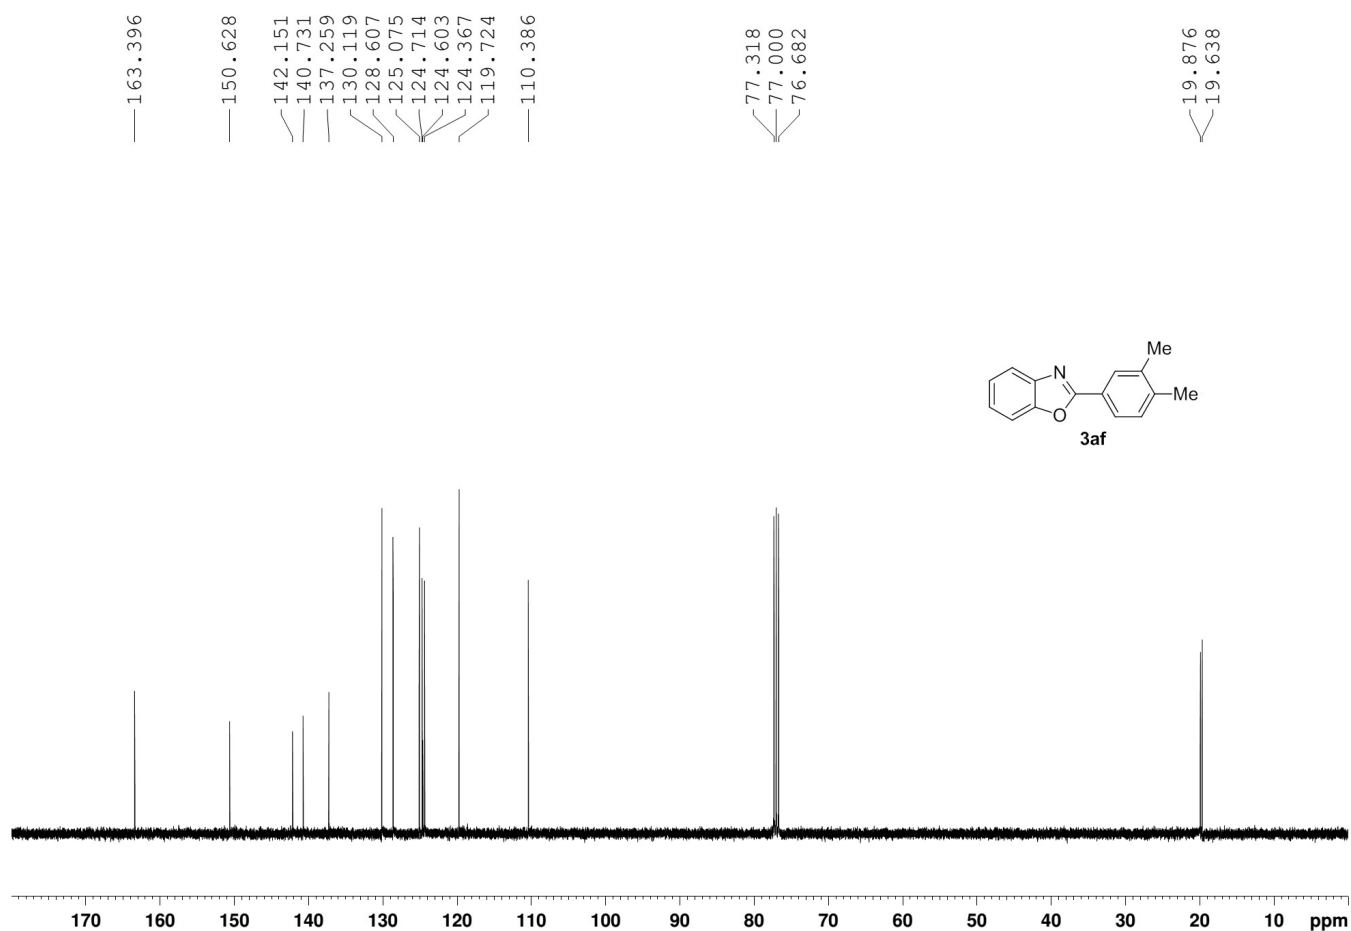

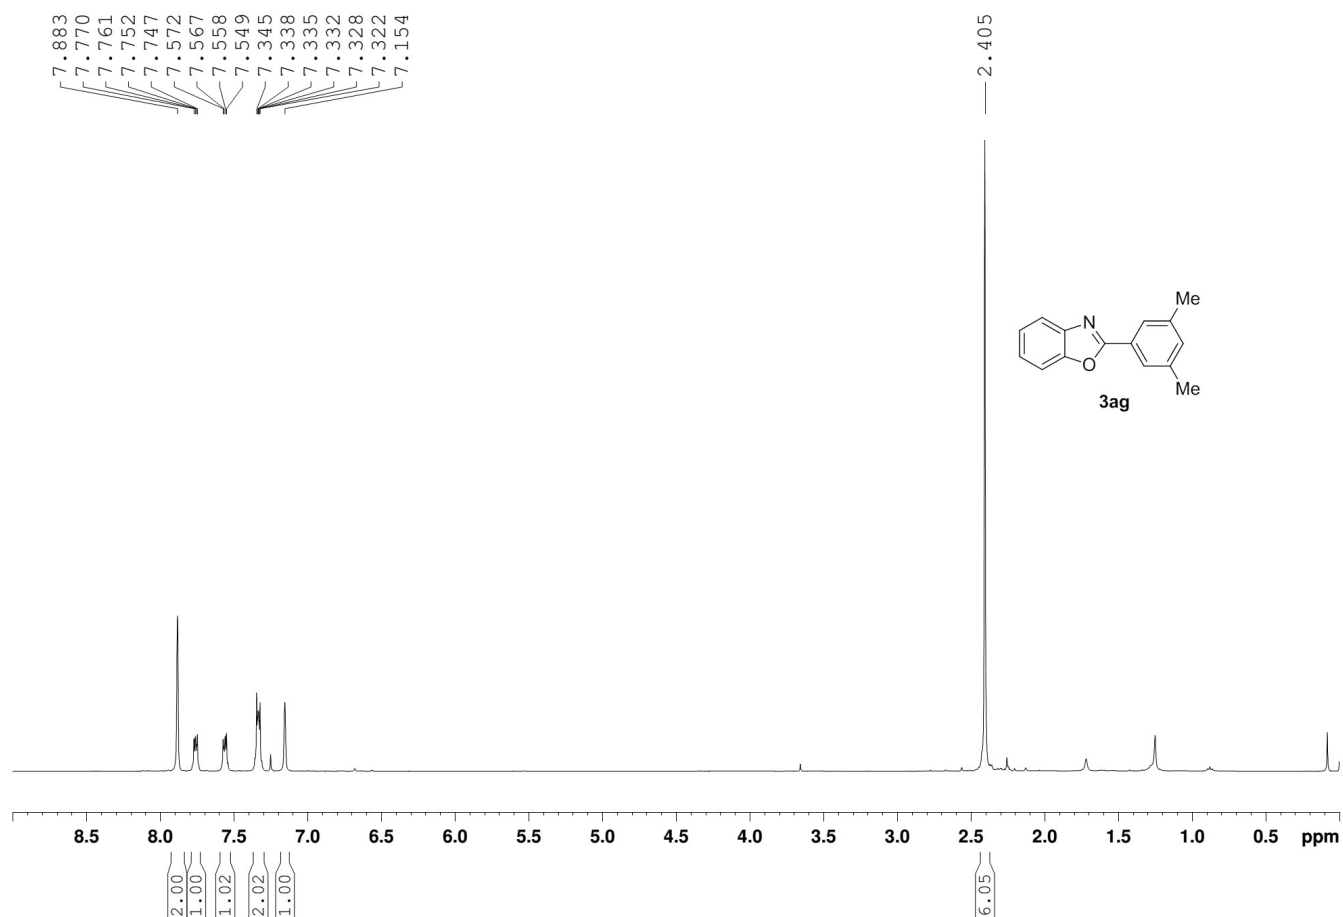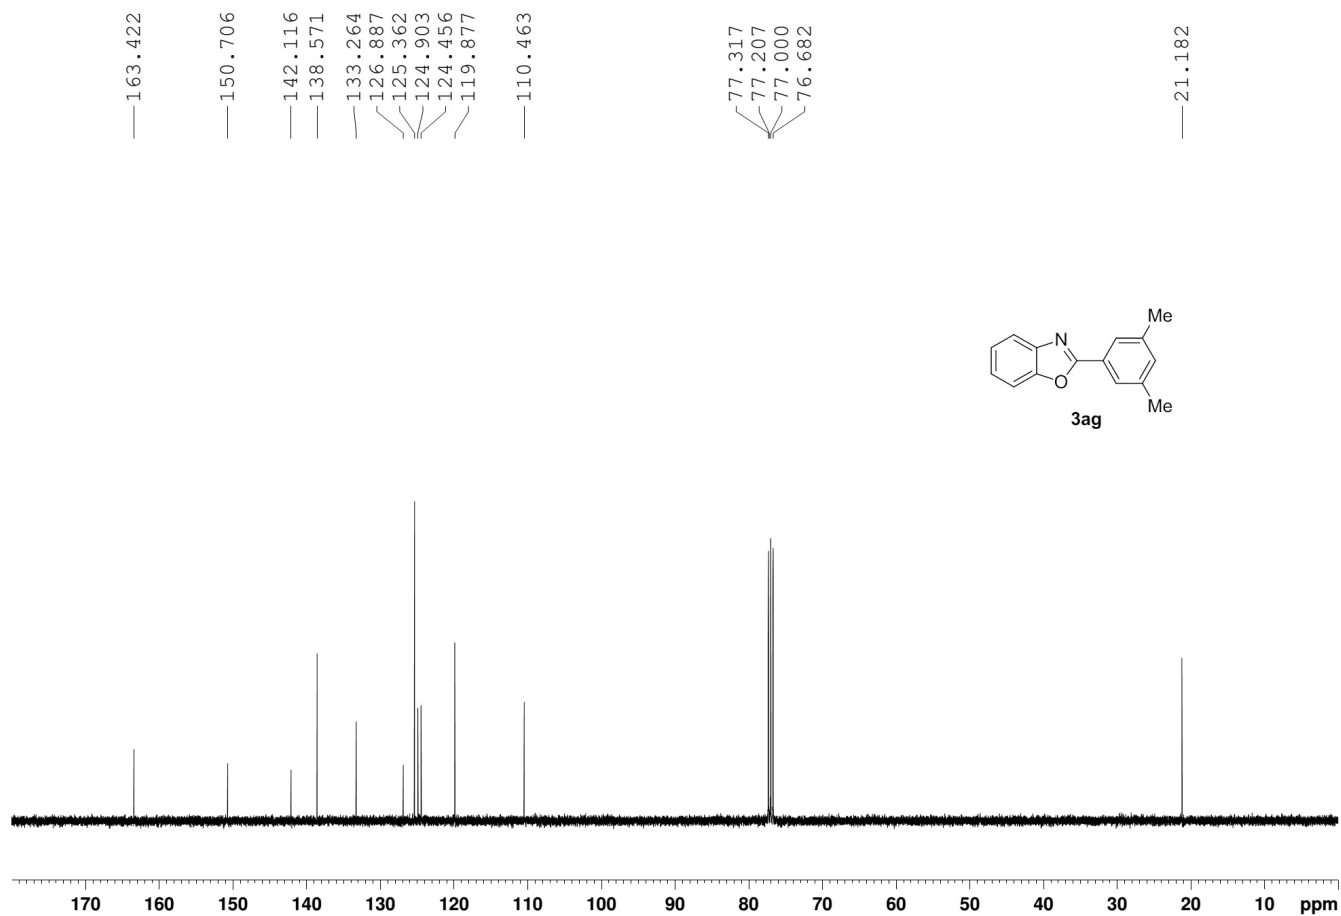

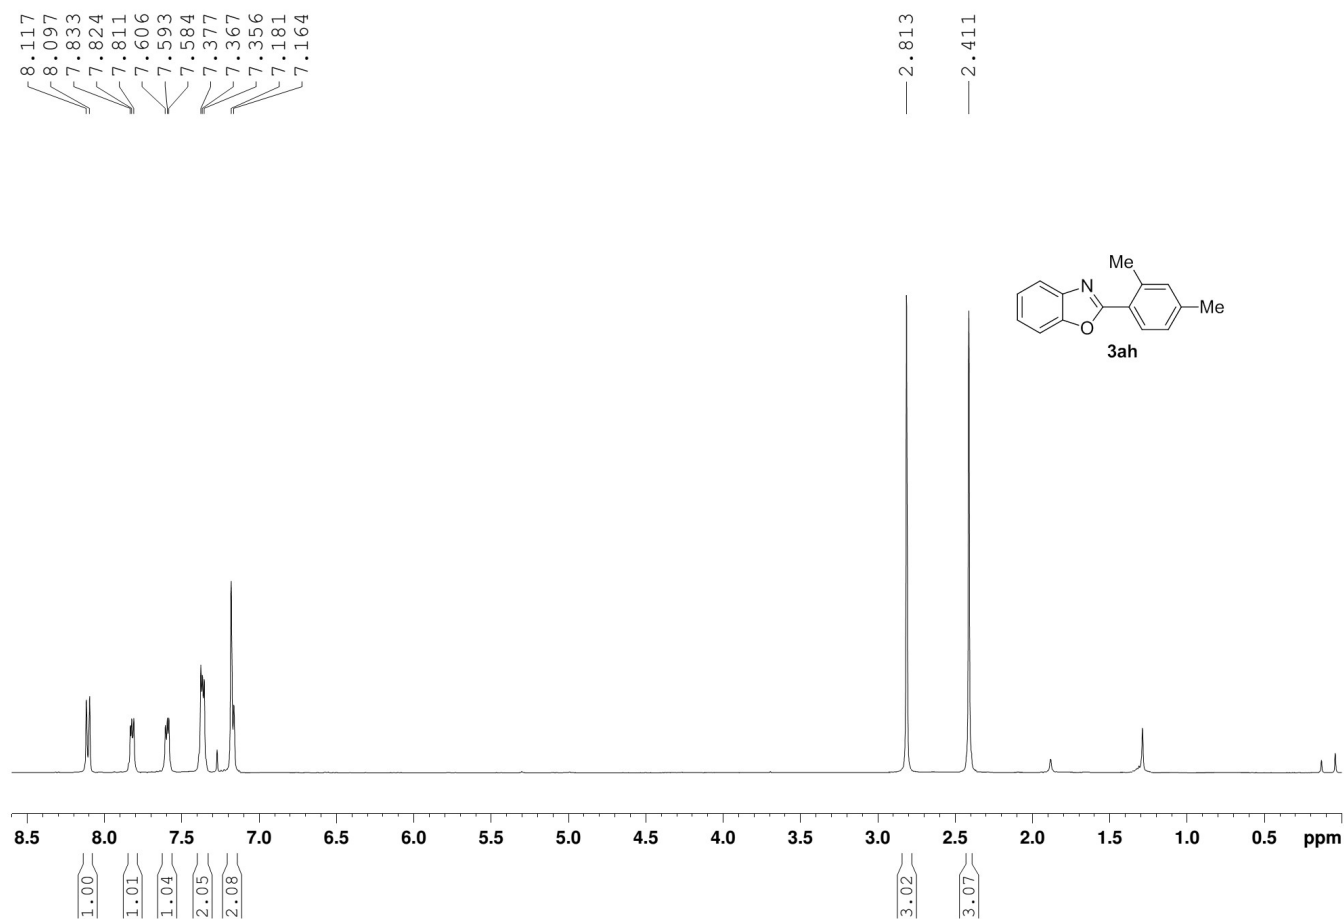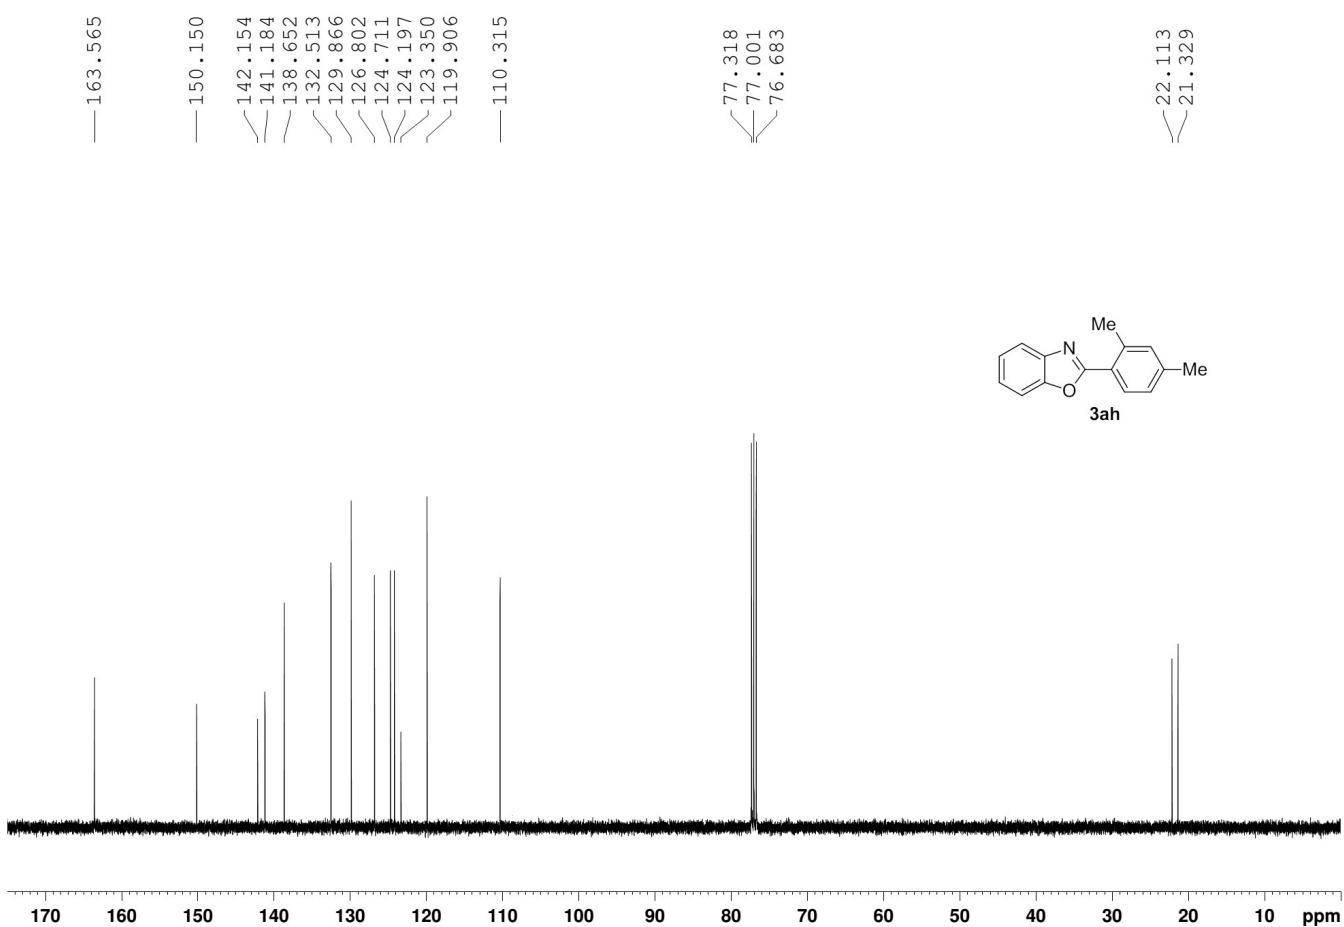

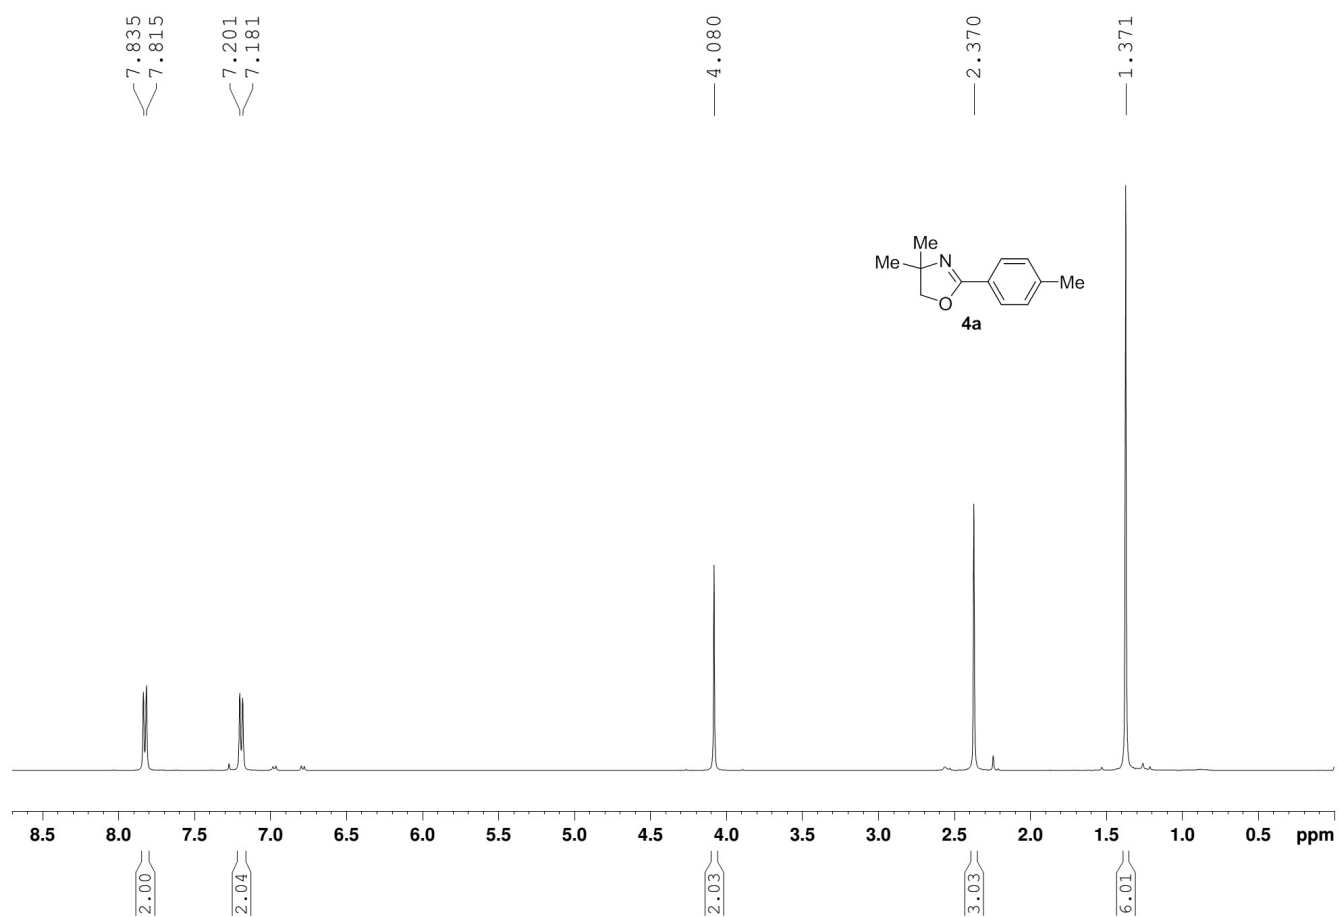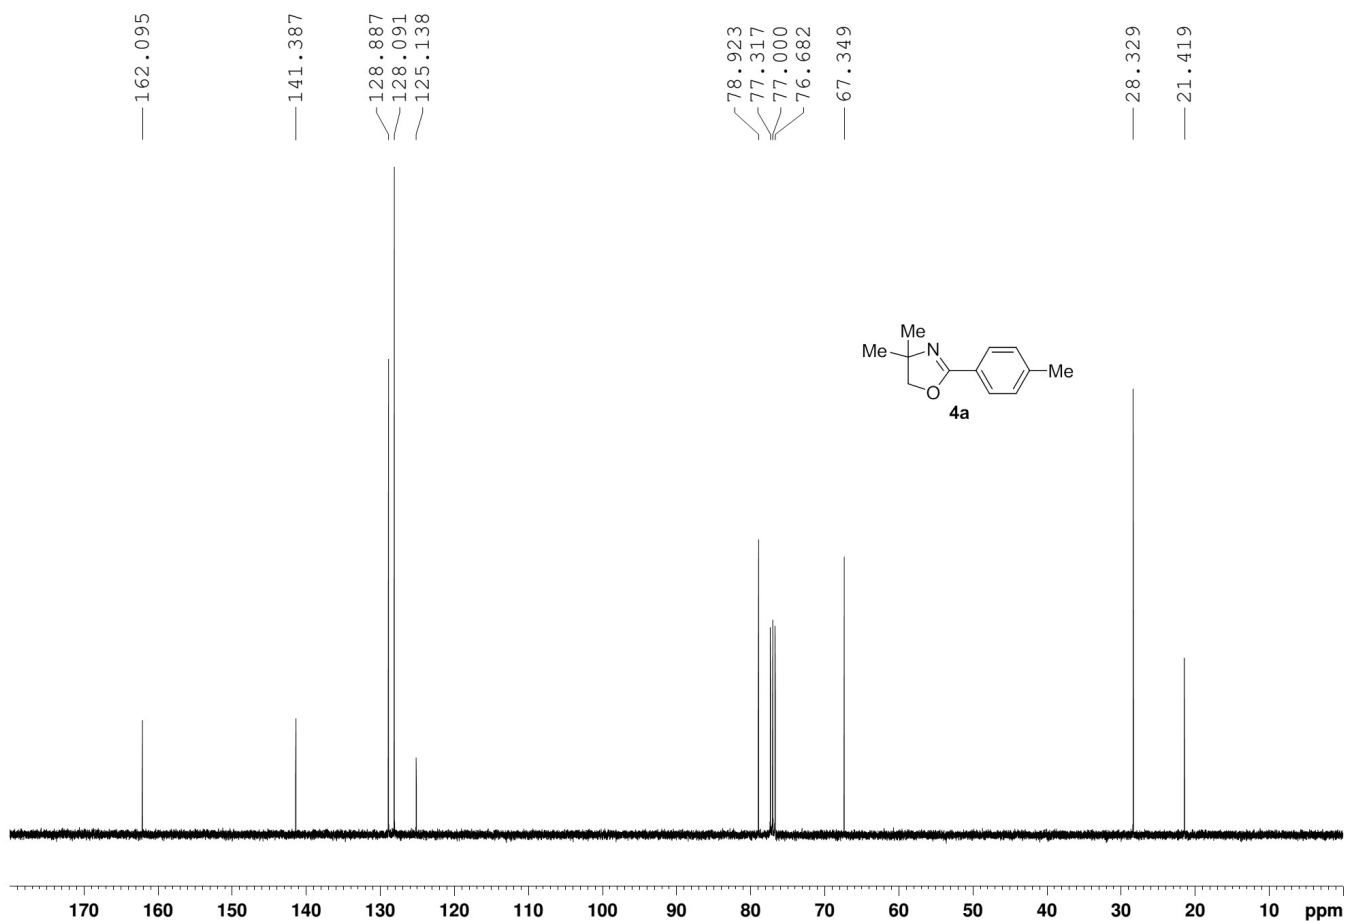



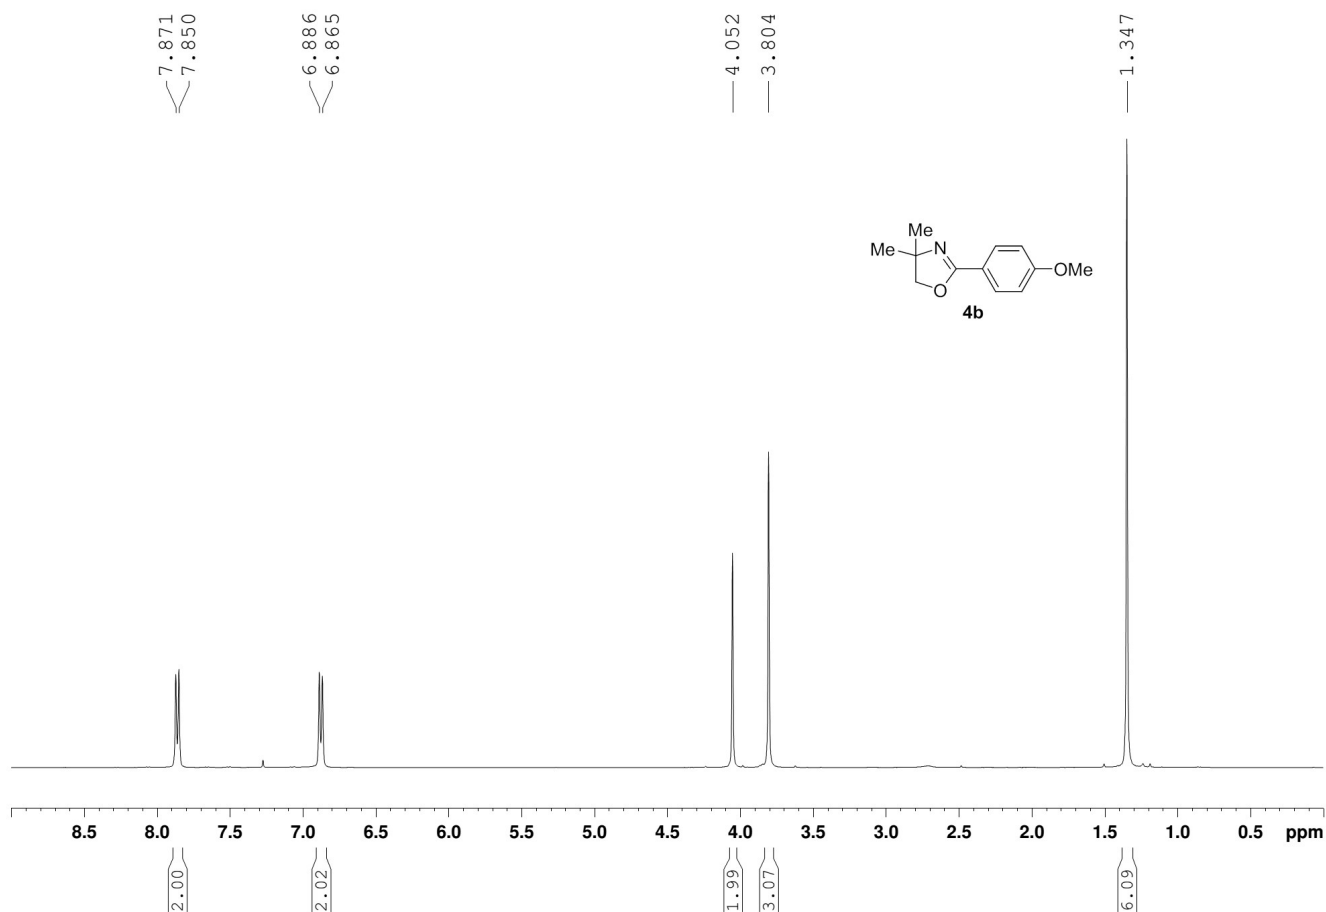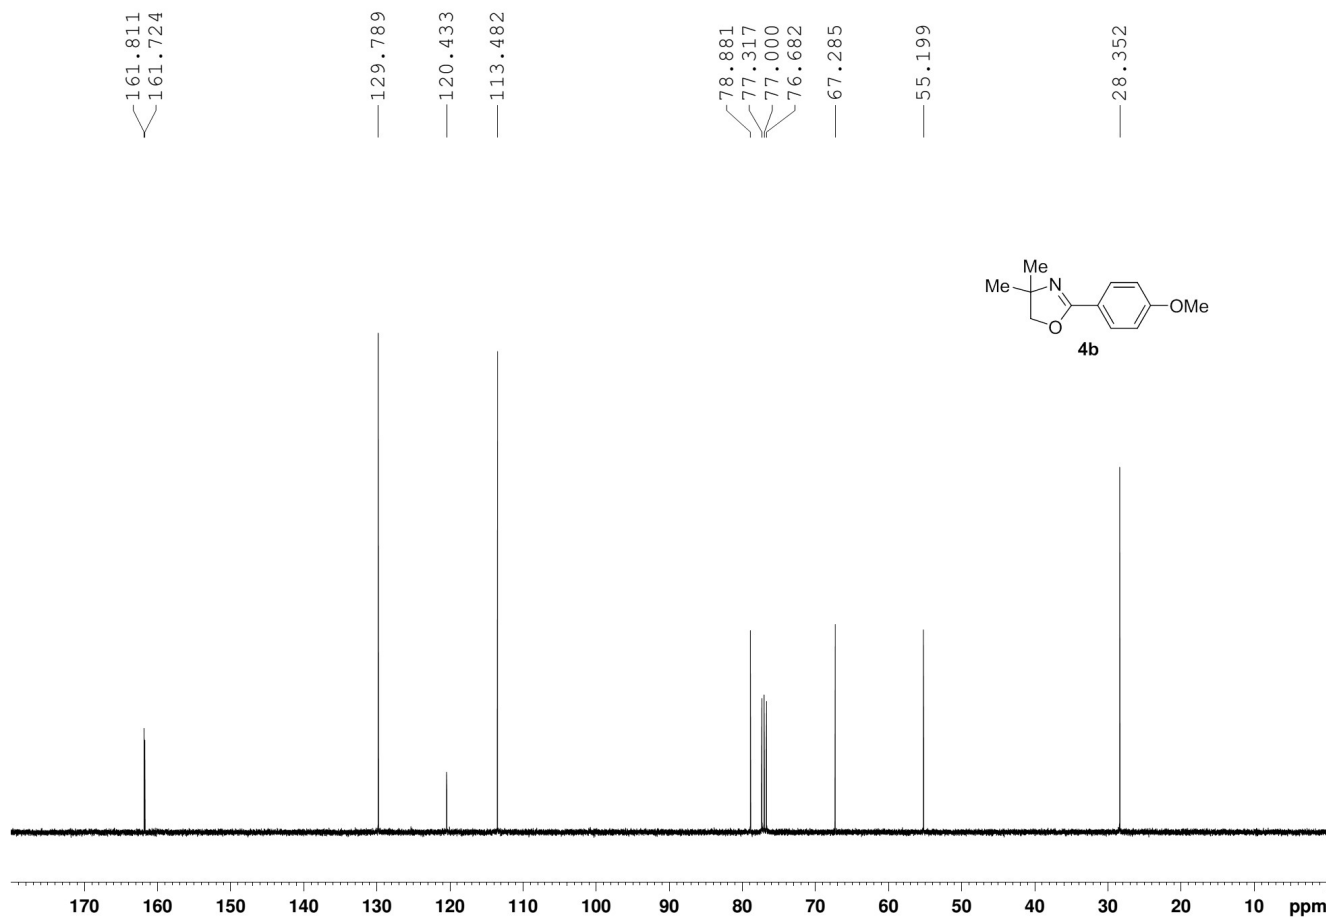

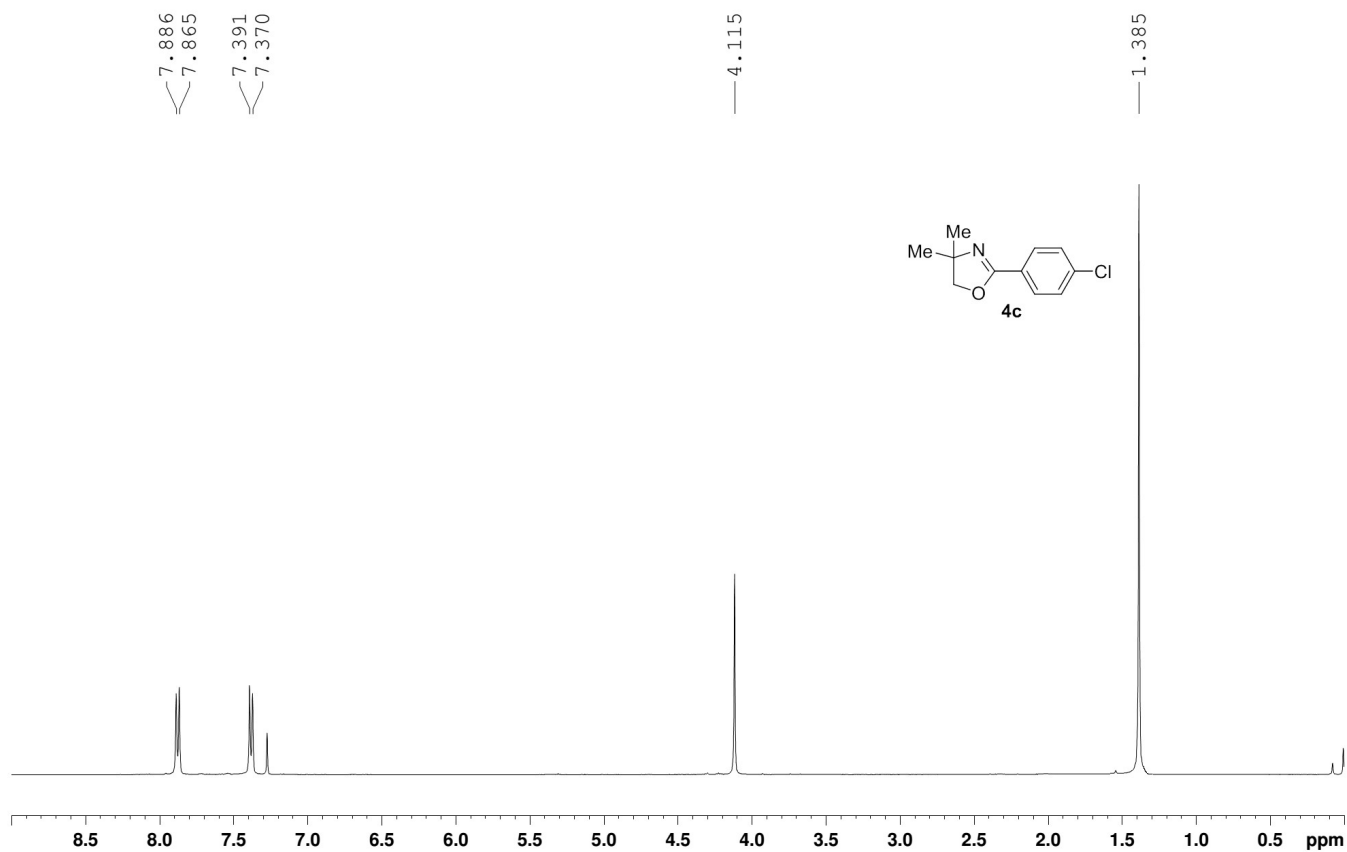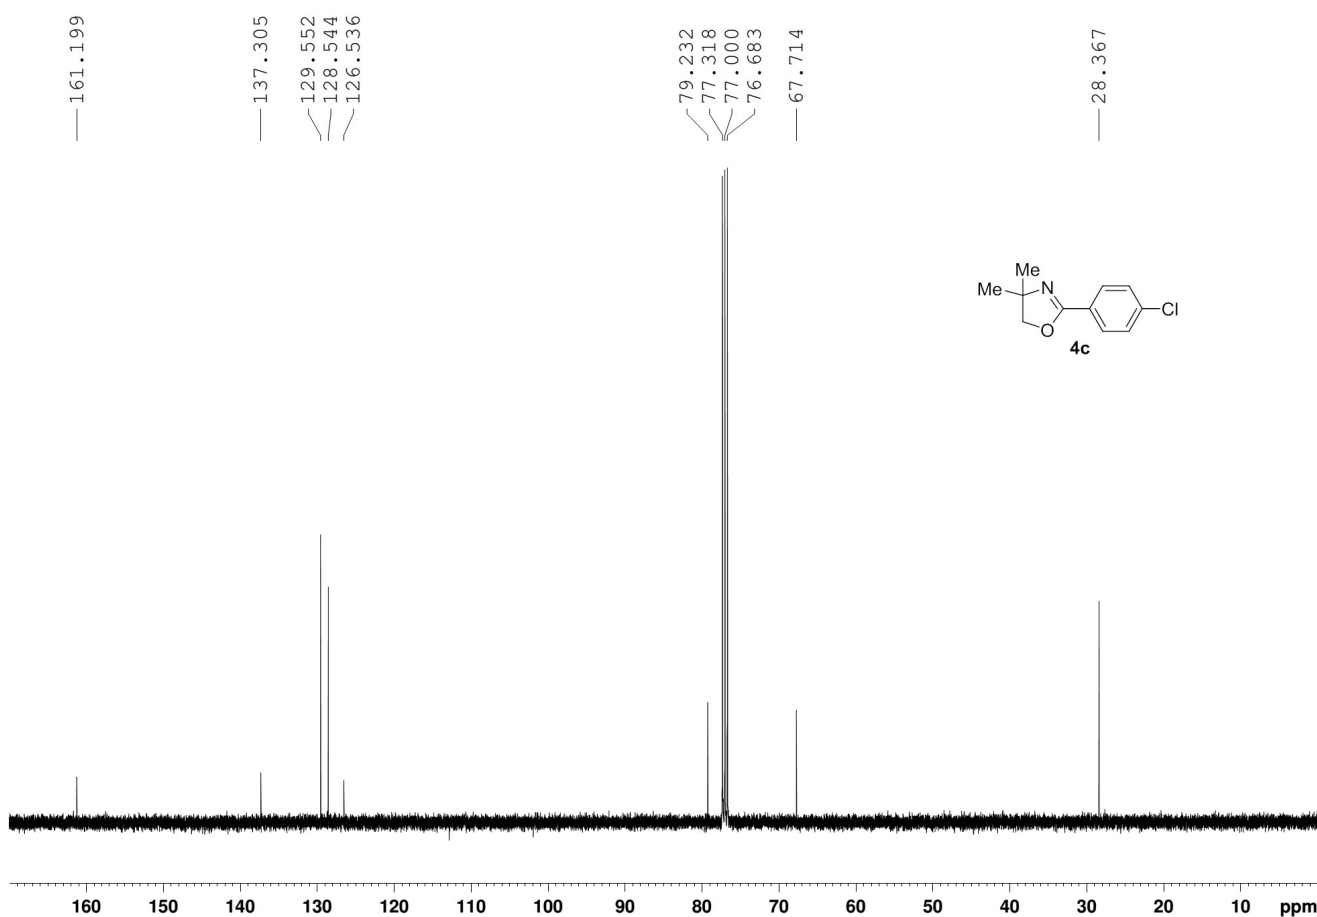

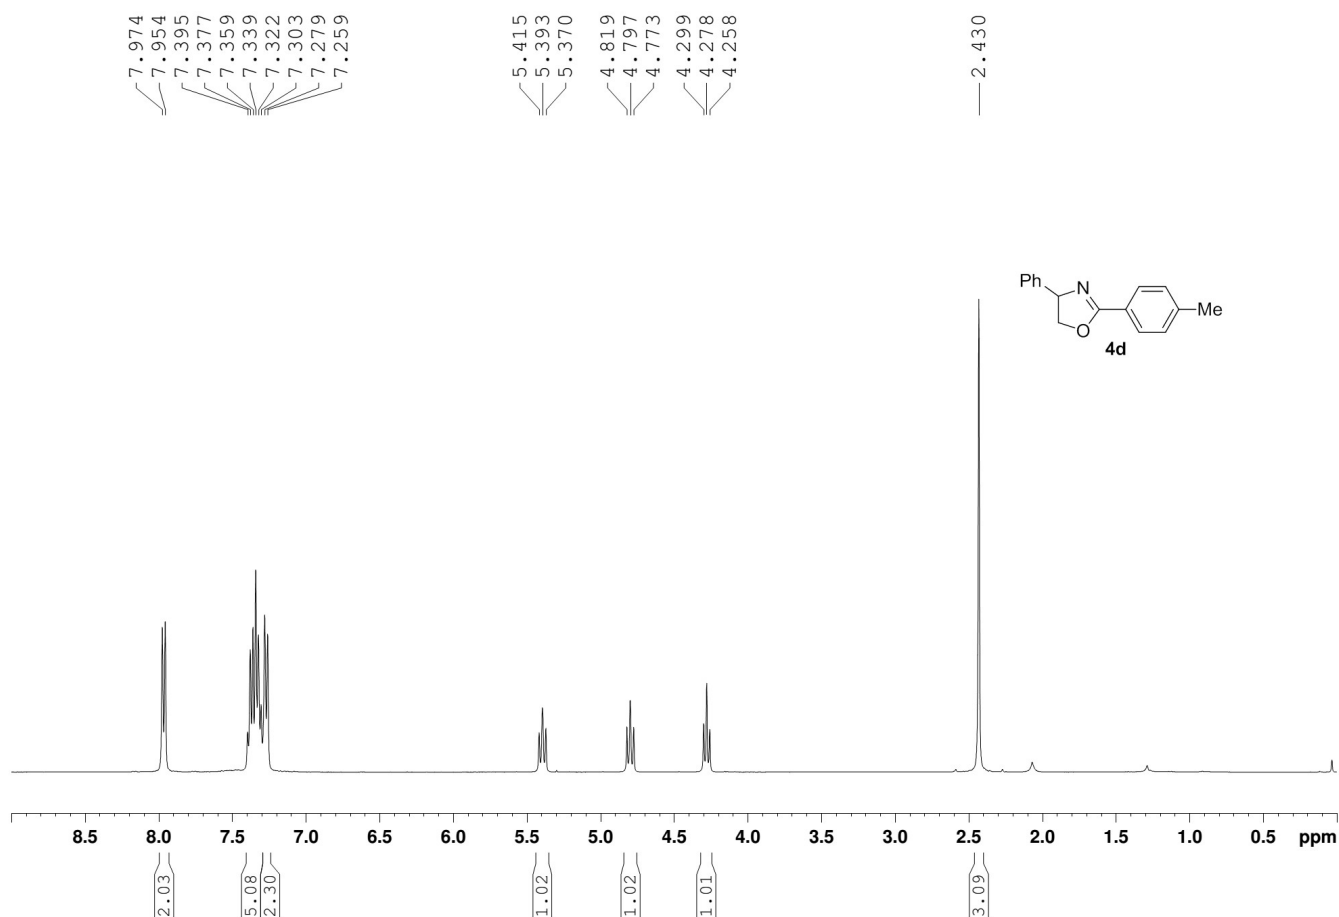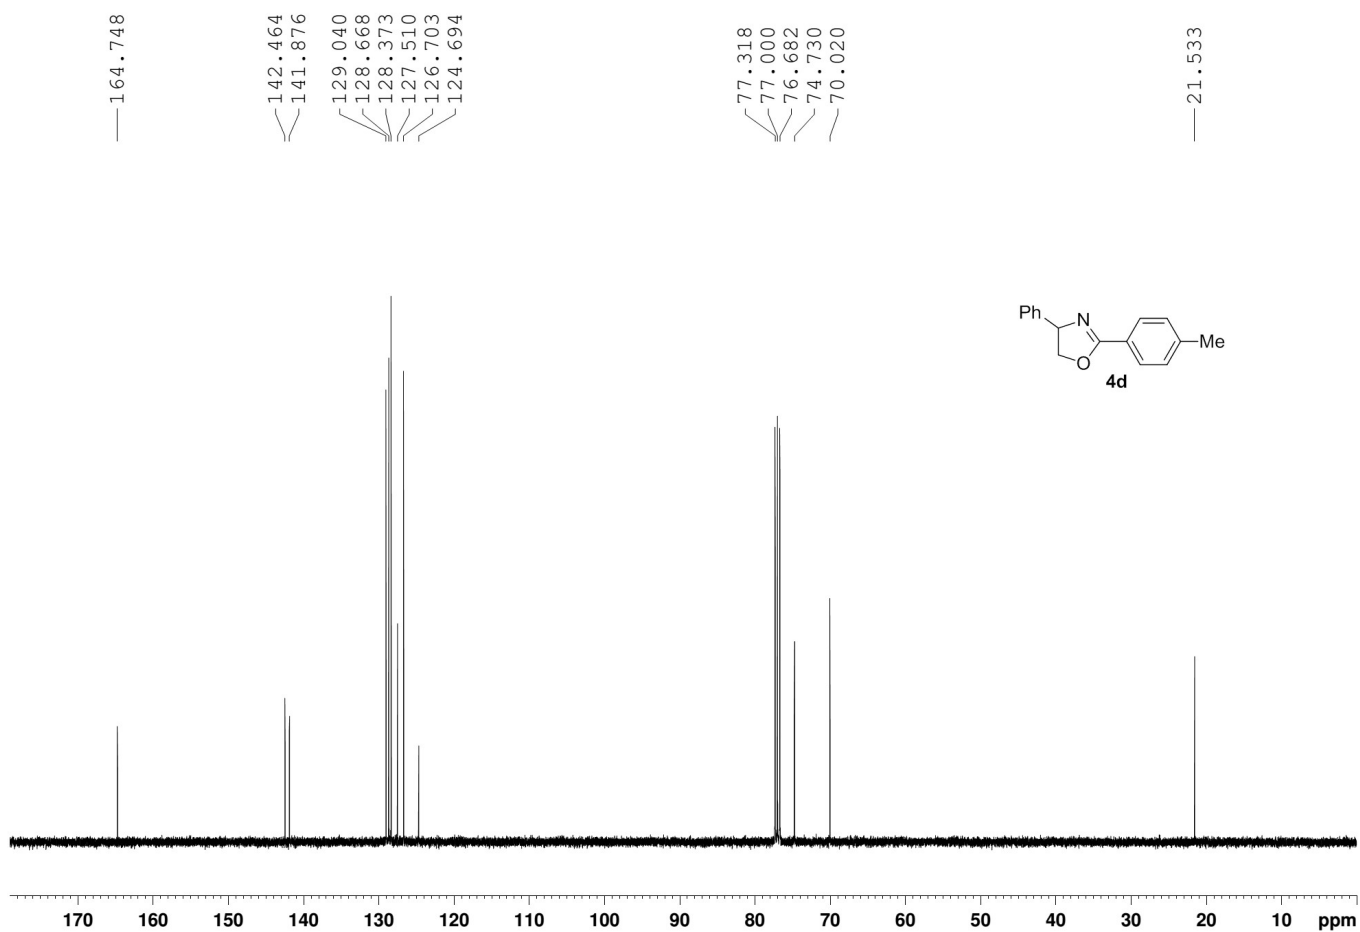

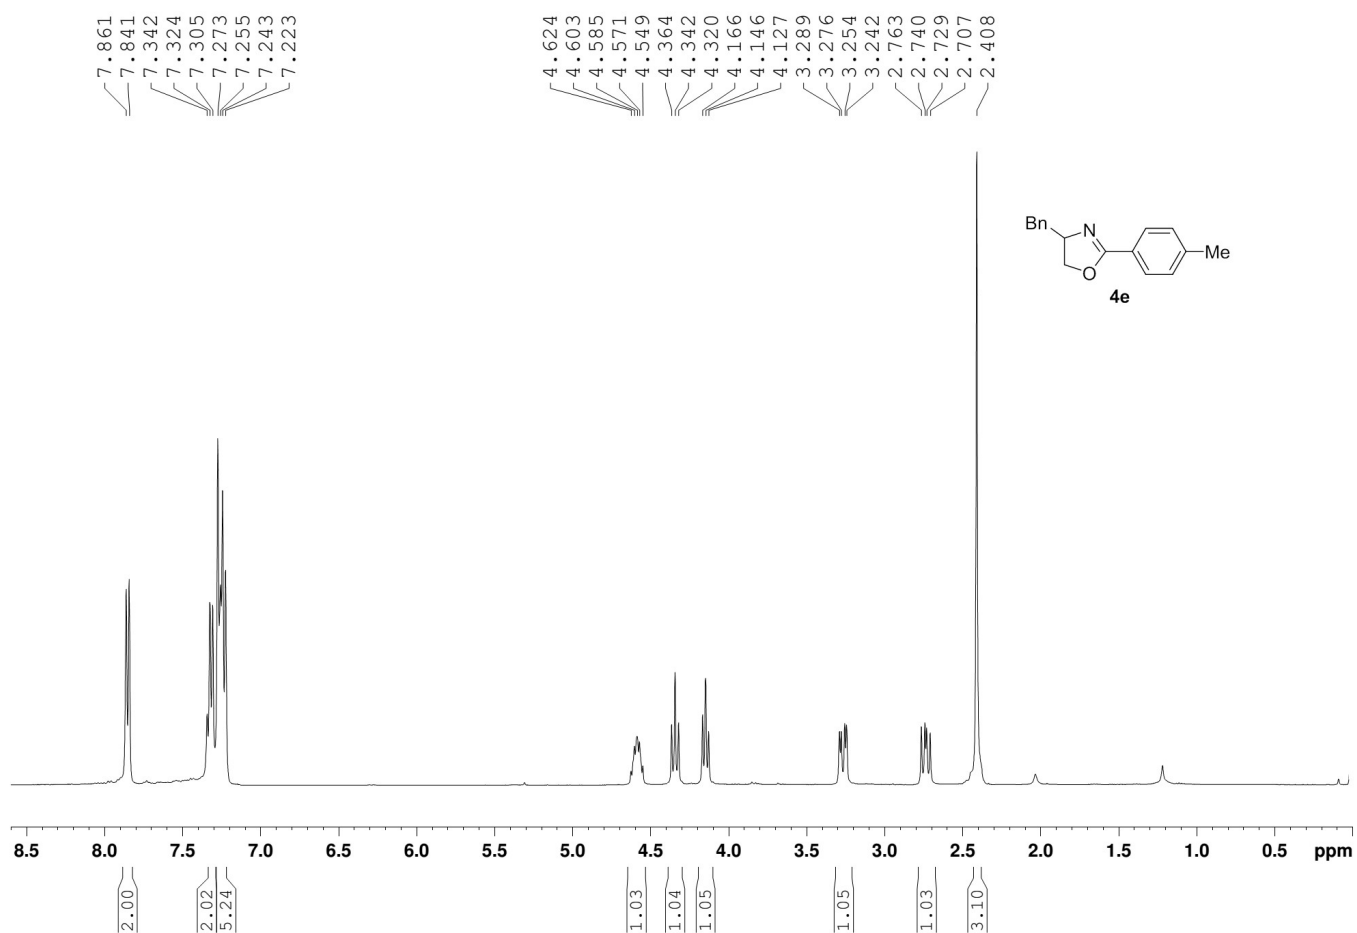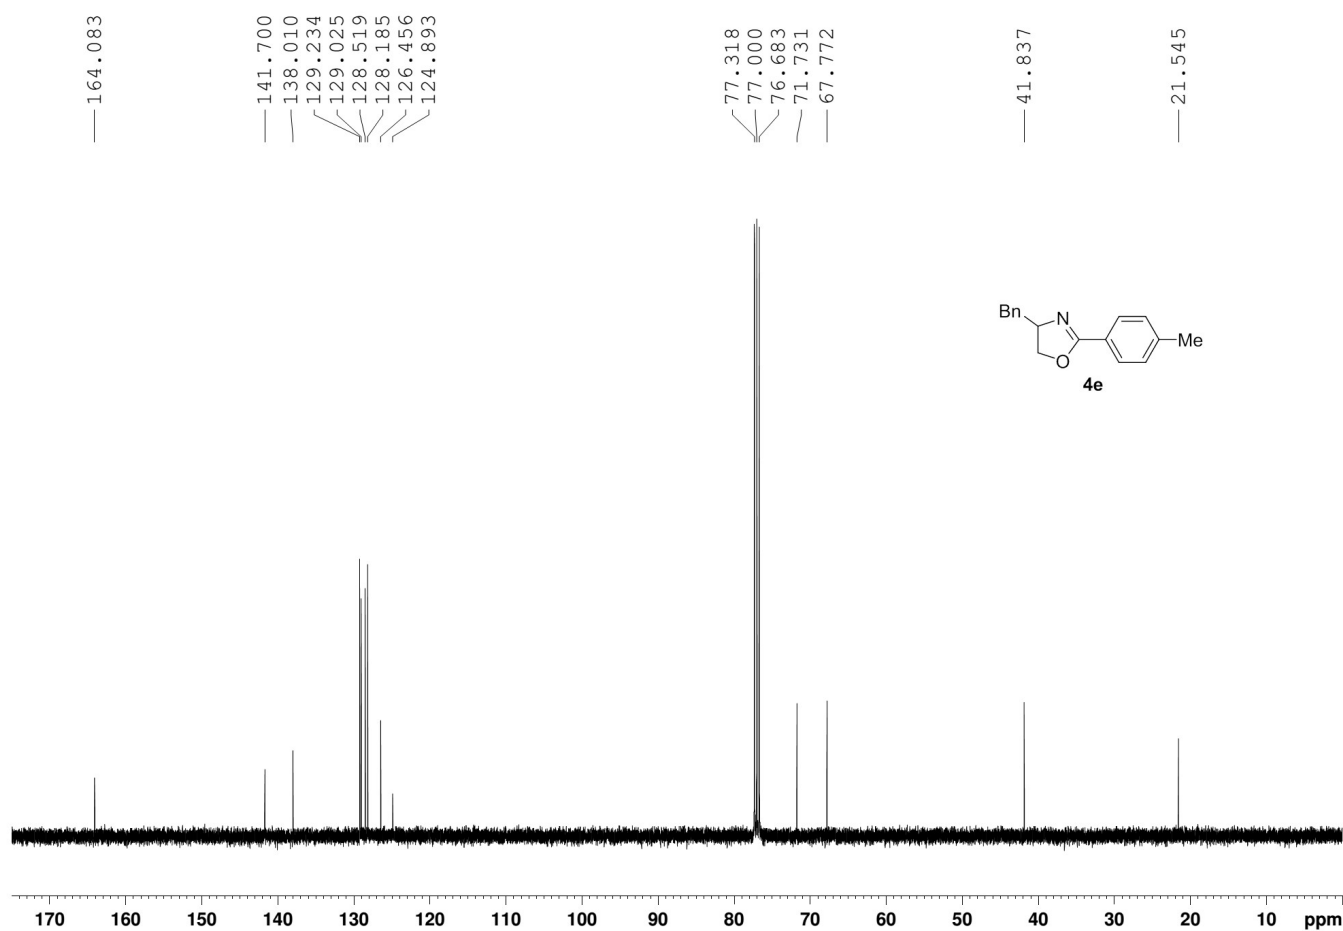

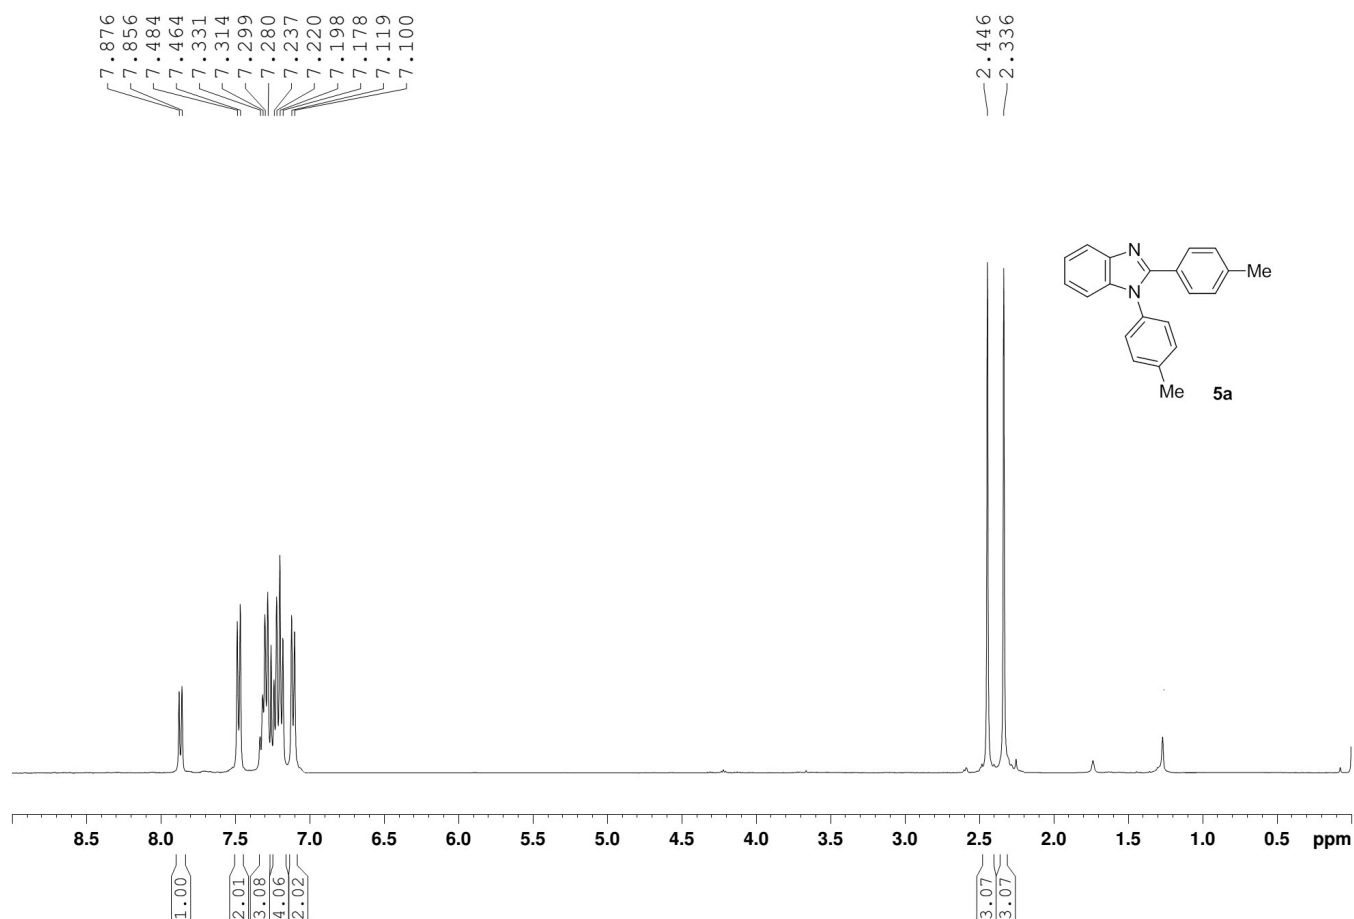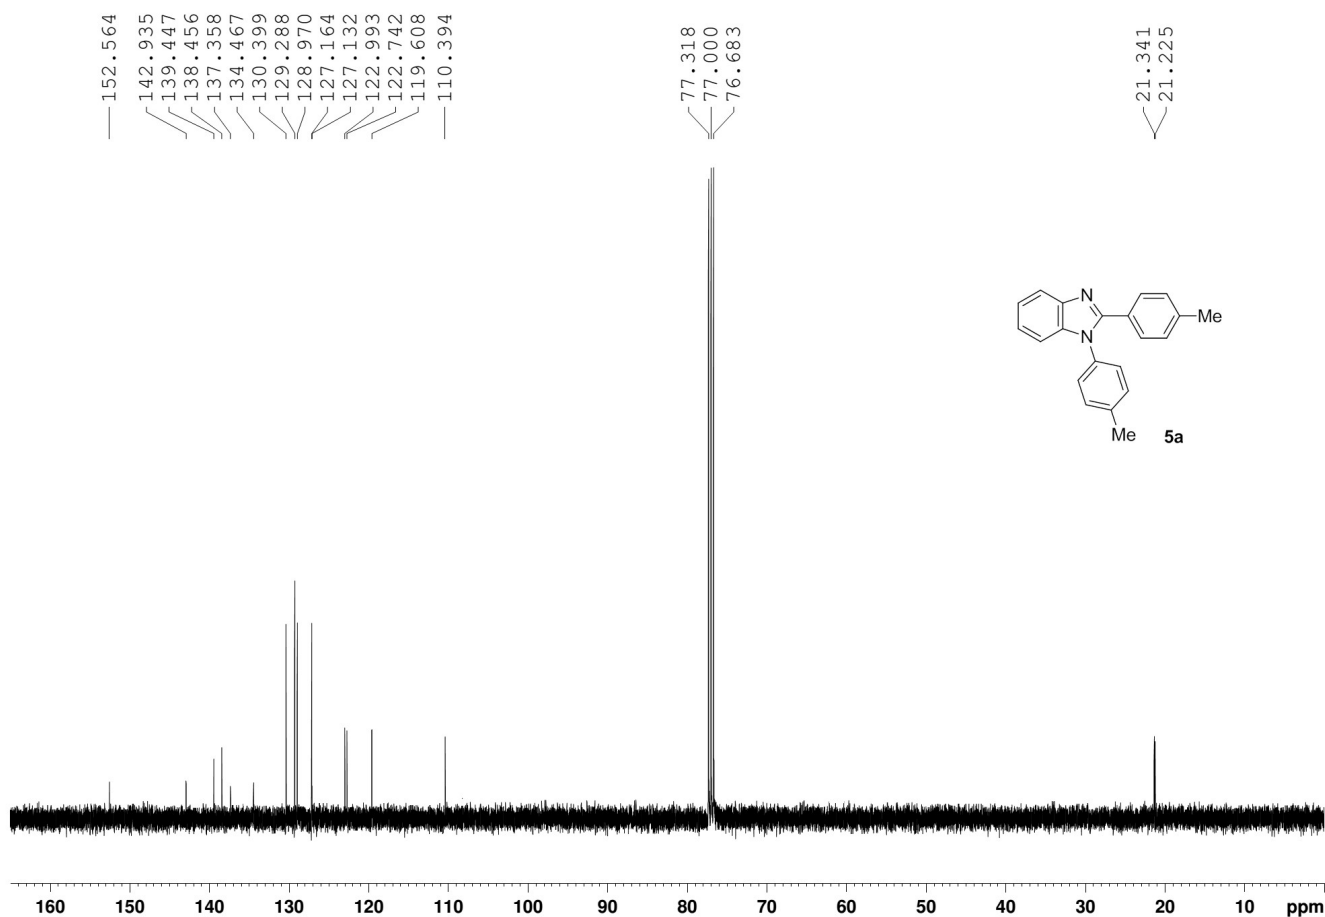

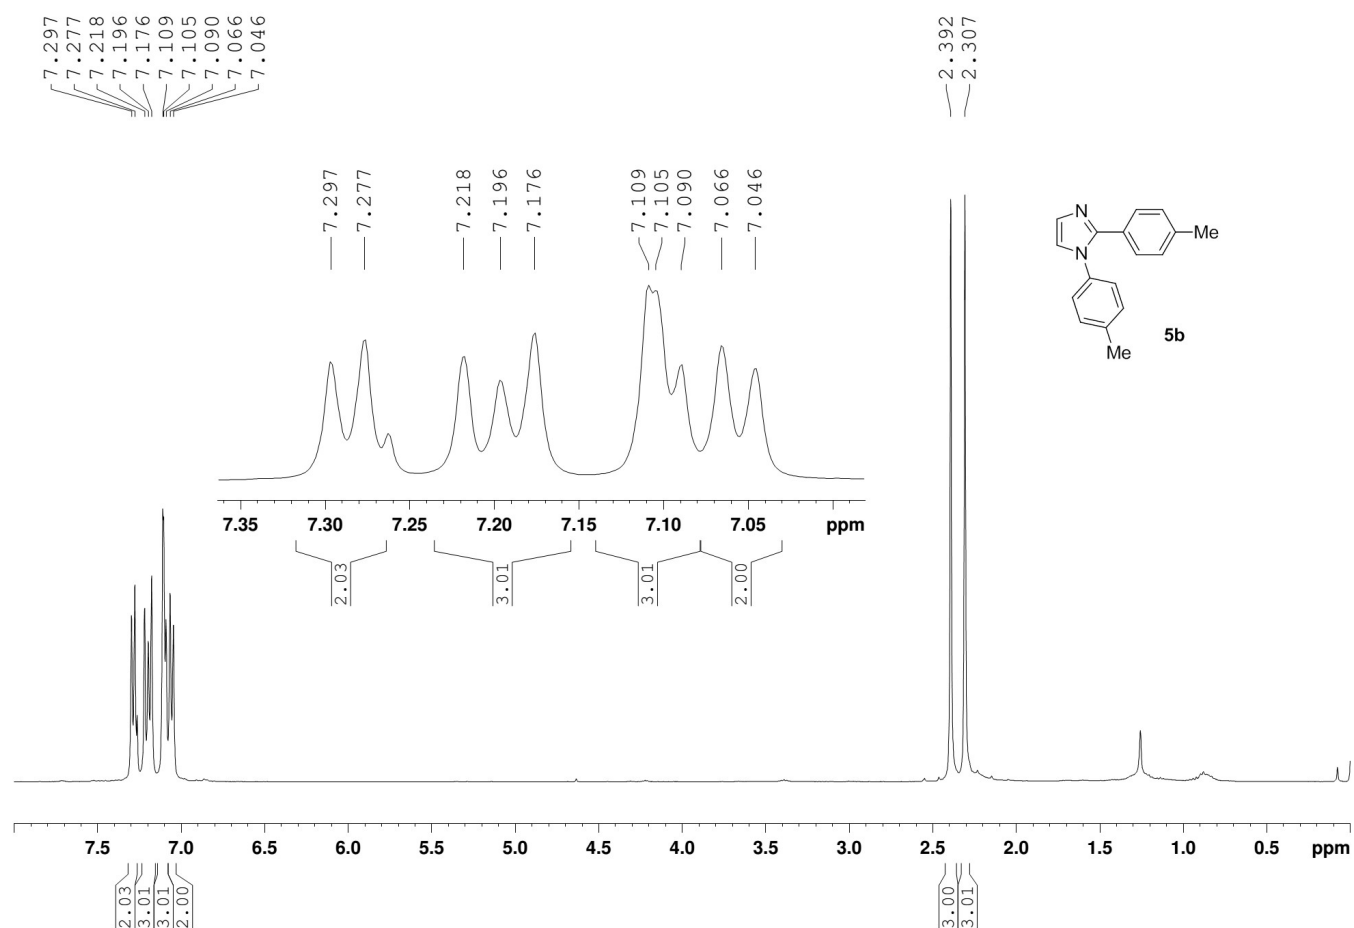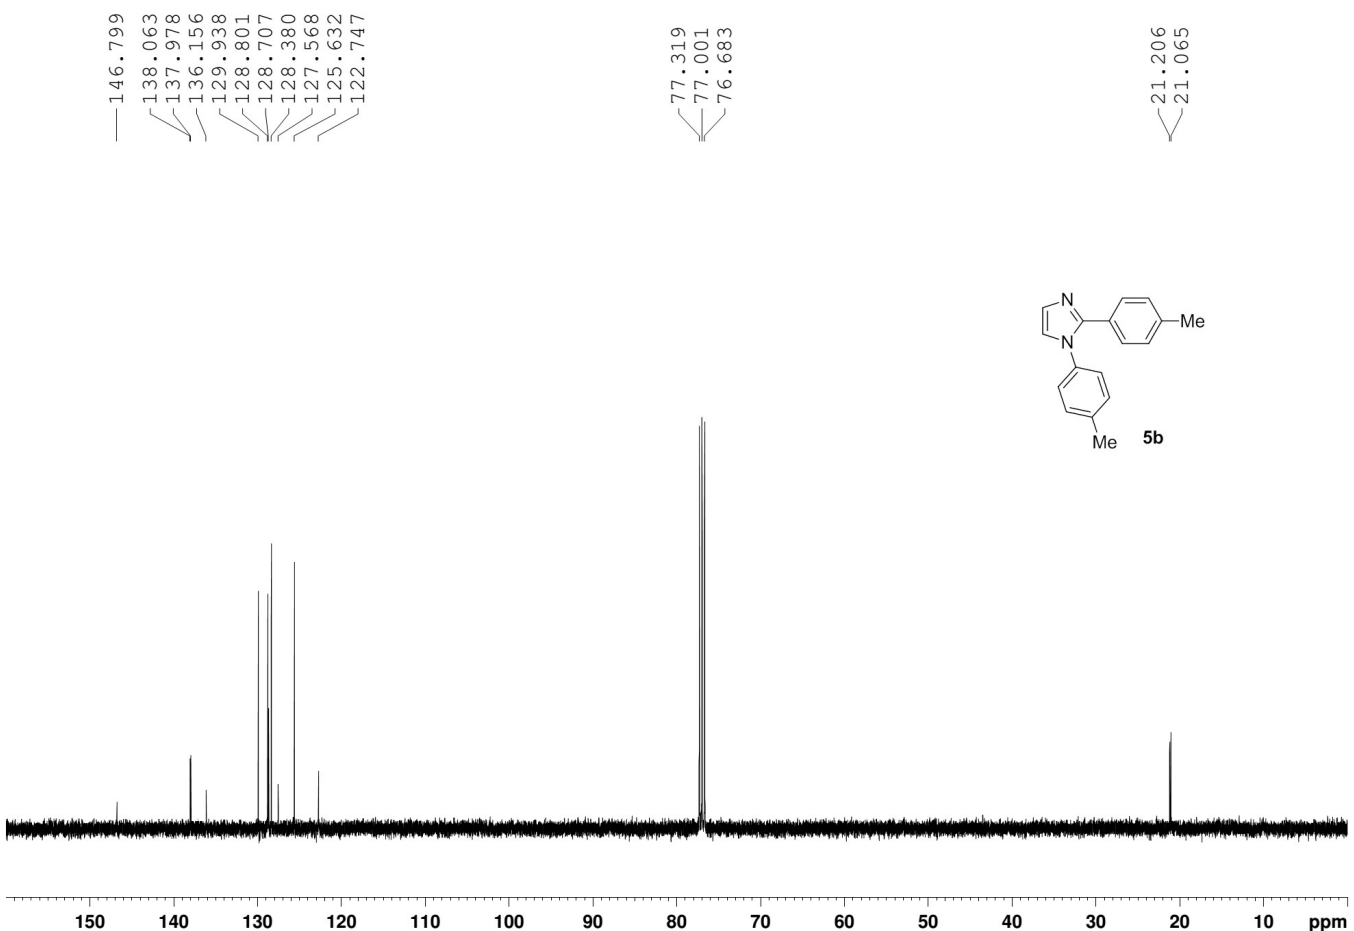

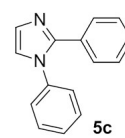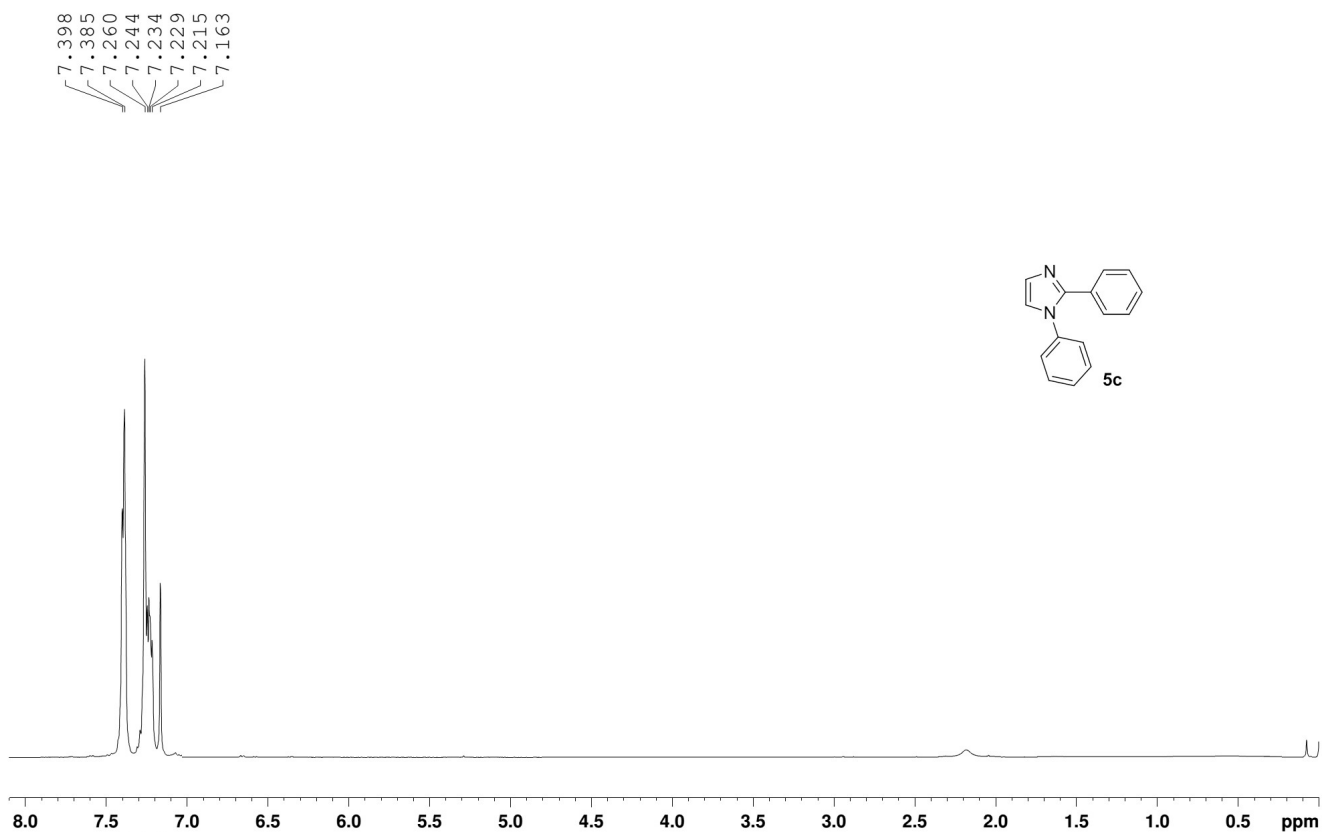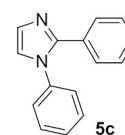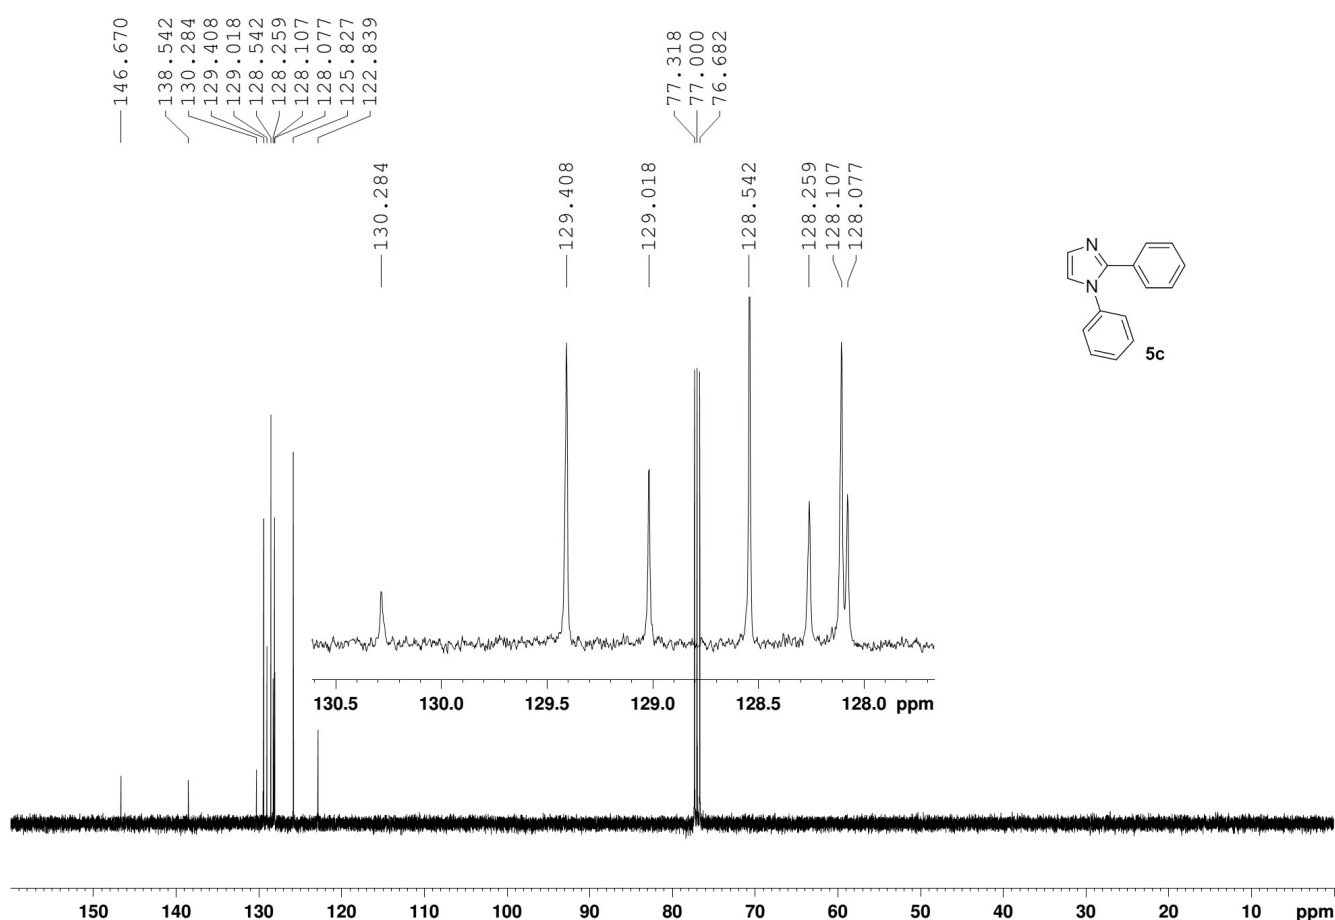

Supplement: c9ob01883b1.pdf [file c9ob01883b1.pdf]
